# Supplementary material
Source: PubMed Central journal article supplement (PMC2664100)

| INDEX | FREQUENCY | PPM   | HEIGHT |
|-------|-----------|-------|--------|
| 1     | 2904.594  | 7.262 | 151.2  |
| 2     | 626.339   | 1.566 | 57.3   |
| 3     | 579.967   | 1.450 | 65.9   |
| 4     | 550.638   | 1.377 | 63.8   |
| 5     | 379.734   | 0.949 | 69.4   |

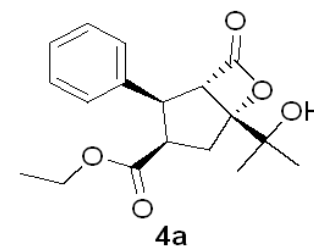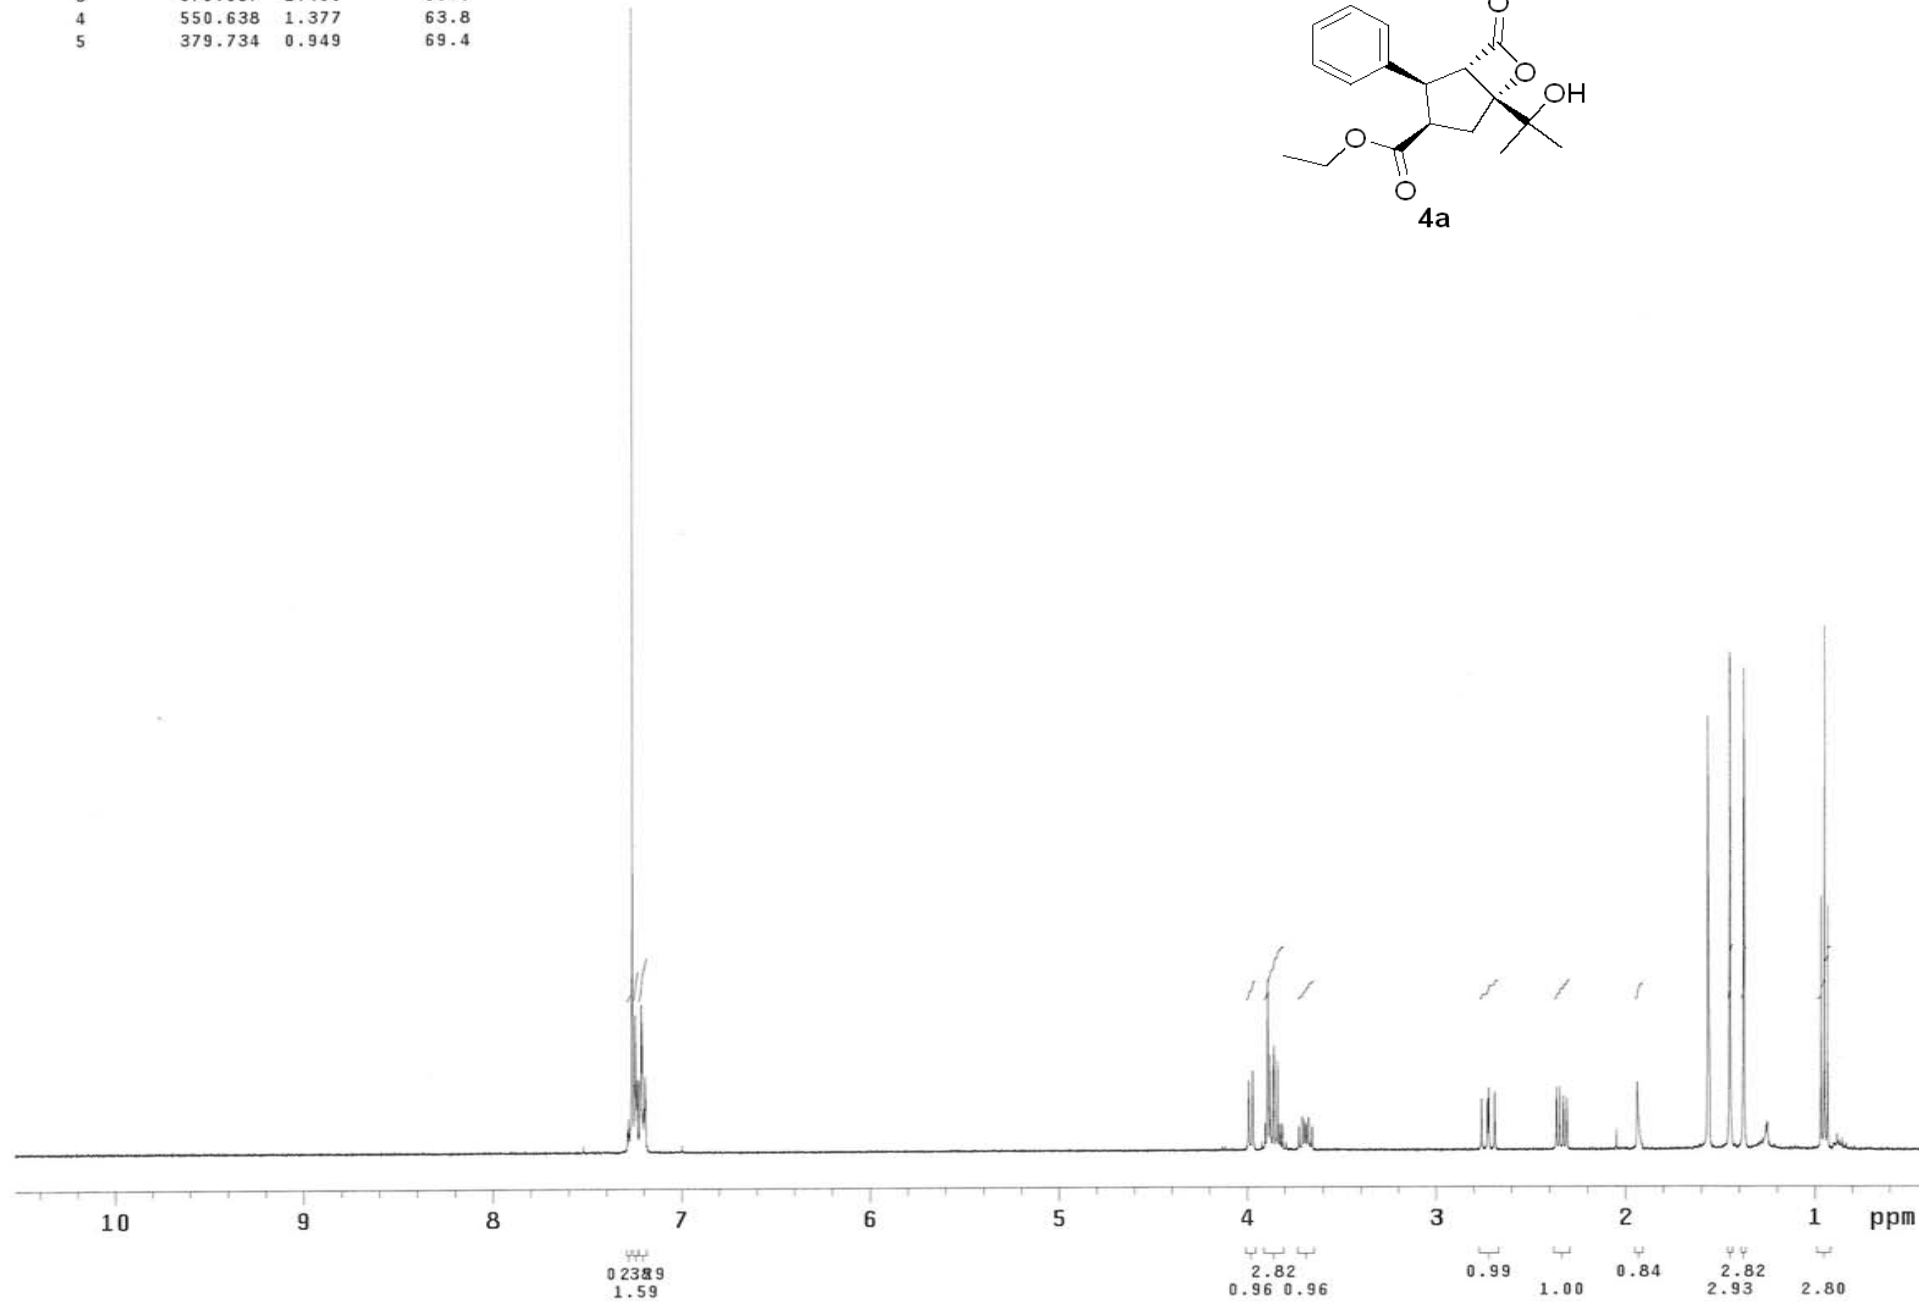

| INDEX | FREQUENCY | PPM     | HEIGHT |
|-------|-----------|---------|--------|
| 1     | 17219.910 | 171.228 | 22.9   |
| 2     | 17090.969 | 169.946 | 14.0   |
| 3     | 13991.052 | 139.121 | 31.2   |
| 4     | 12942.741 | 128.697 | 81.0   |
| 5     | 12868.733 | 127.962 | 70.5   |
| 6     | 12832.111 | 127.597 | 40.5   |
| 7     | 9507.883  | 94.543  | 21.2   |
| 8     | 7798.846  | 77.549  | 39.9   |
| 9     | 7766.802  | 77.230  | 40.5   |
| 10    | 7734.757  | 76.911  | 39.1   |
| 11    | 7181.609  | 71.411  | 21.0   |
| 12    | 6205.780  | 61.708  | 25.6   |
| 13    | 6128.721  | 60.942  | 38.5   |
| 14    | 4853.047  | 48.257  | 36.3   |
| 15    | 4773.699  | 47.468  | 35.4   |
| 16    | 3198.181  | 31.801  | 16.1   |
| 17    | 2561.107  | 25.467  | 35.9   |
| 18    | 1402.929  | 13.950  | 39.6   |

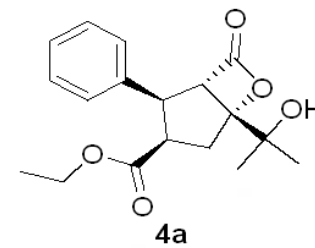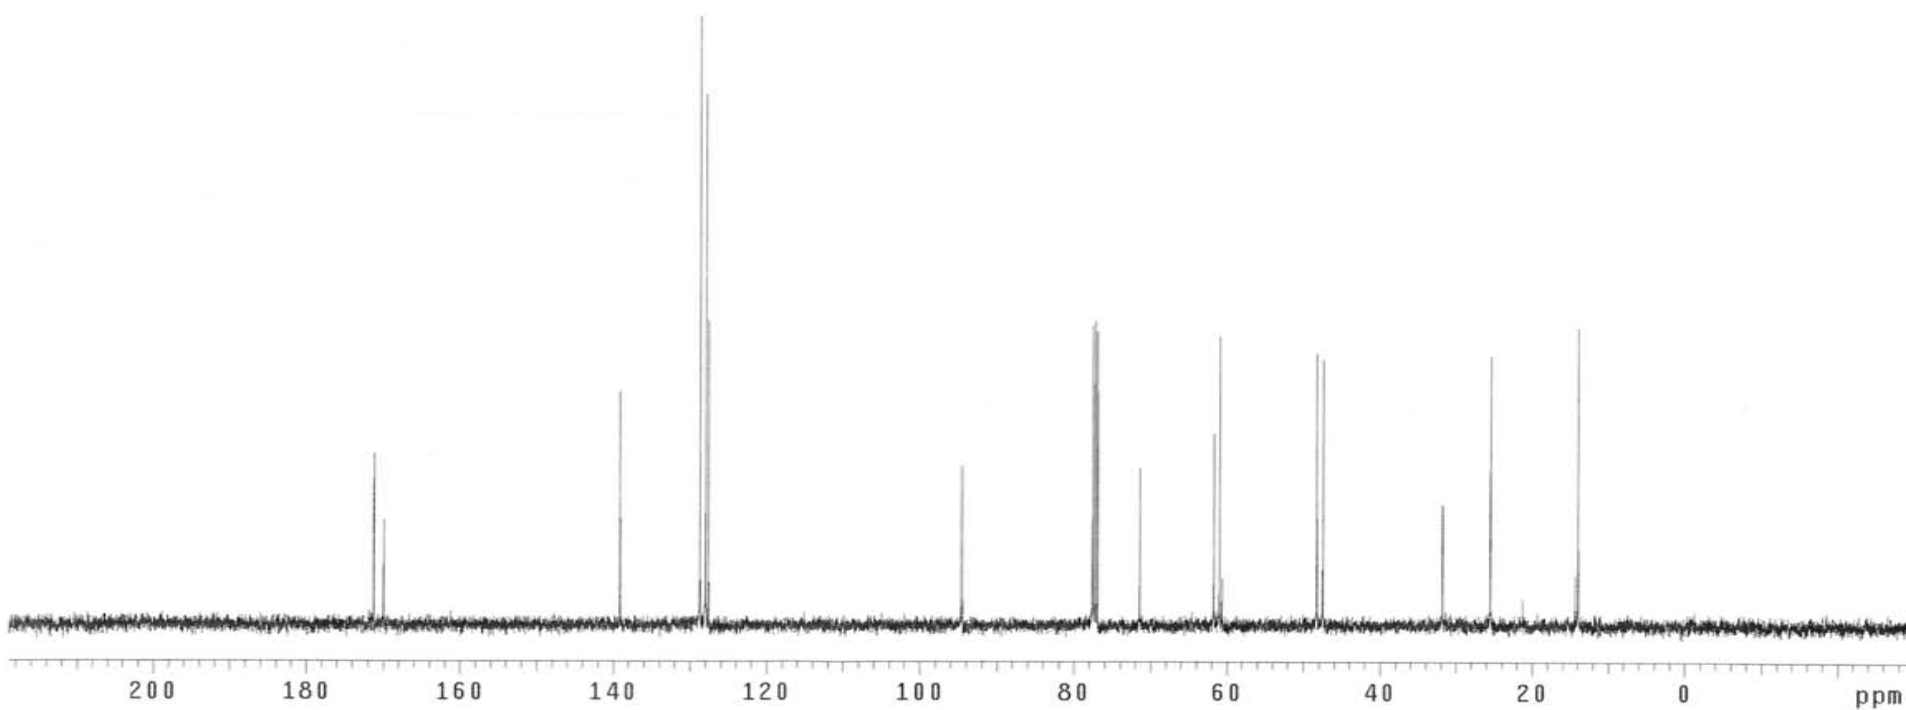

| INDEX | FREQUENCY | PPM   | HEIGHT |
|-------|-----------|-------|--------|
| 1     | 2946.514  | 7.367 | 54.6   |
| 2     | 2904.594  | 7.262 | 77.4   |
| 3     | 585.802   | 1.465 | 127.0  |
| 4     | 580.427   | 1.451 | 151.2  |
| 5     | 479.083   | 1.198 | 58.5   |
| 6     | 471.866   | 1.180 | 118.7  |
| 7     | 464.802   | 1.162 | 59.3   |

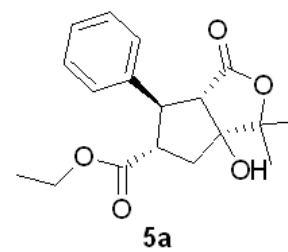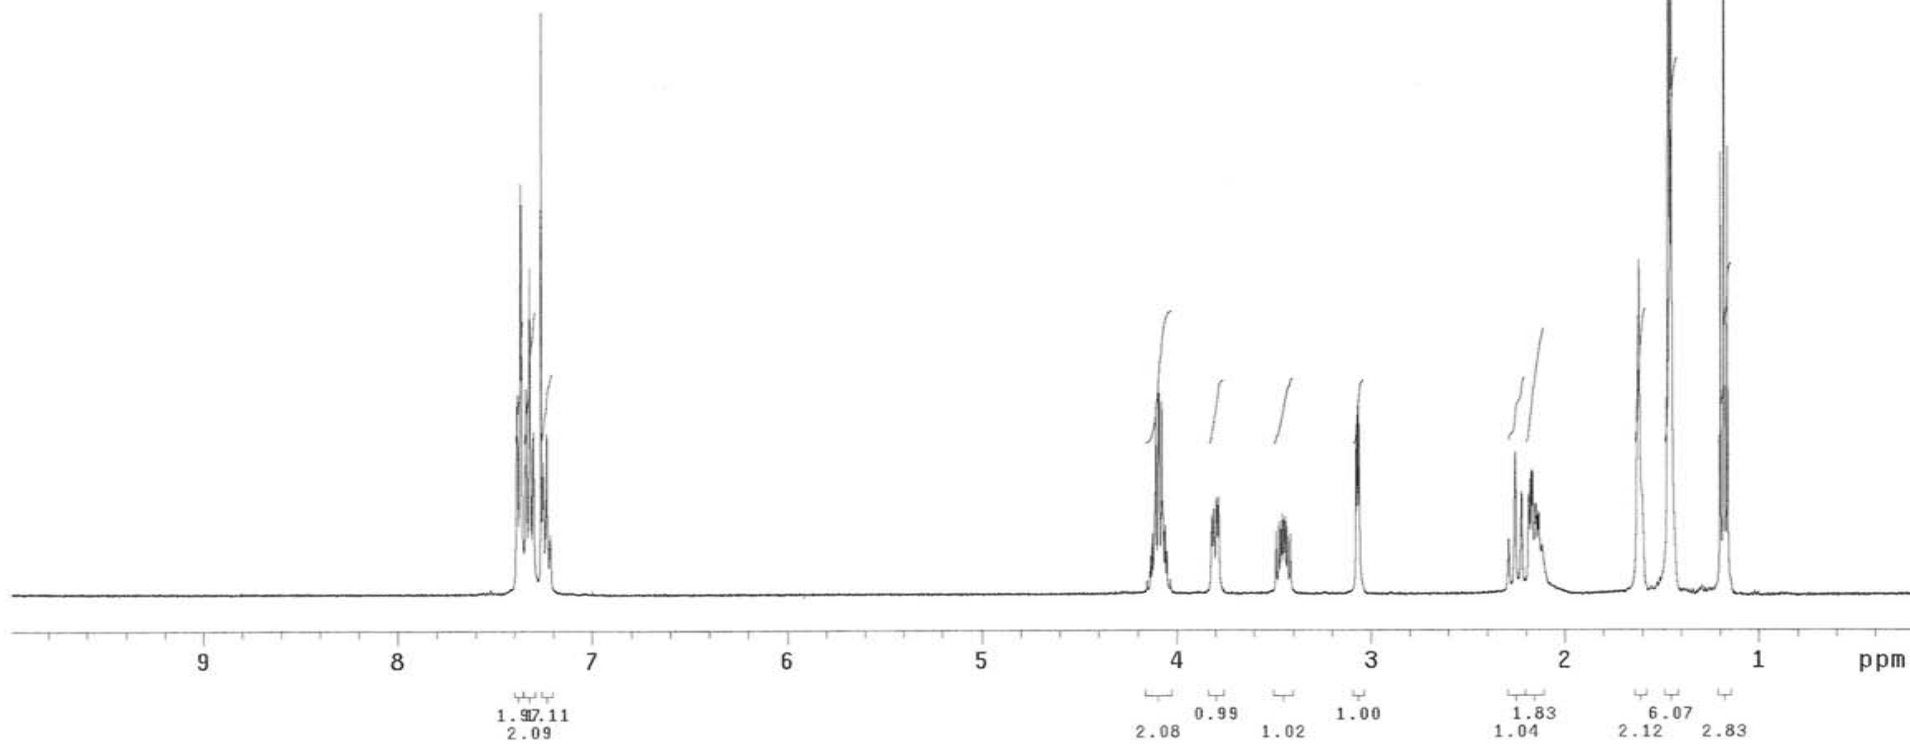

| INDEX | FREQUENCY | PPM     | HEIGHT |
|-------|-----------|---------|--------|
| 1     | 17451.088 | 173.527 | 16.8   |
| 2     | 14384.740 | 143.036 | 25.4   |
| 3     | 12964.104 | 128.910 | 58.2   |
| 4     | 12856.526 | 127.840 | 57.8   |
| 5     | 12783.282 | 127.112 | 27.3   |
| 6     | 8846.394  | 87.965  | 22.1   |
| 7     | 8591.564  | 85.431  | 14.8   |
| 8     | 7798.846  | 77.549  | 78.0   |
| 9     | 7766.802  | 77.230  | 81.0   |
| 10    | 7734.757  | 76.911  | 79.7   |
| 11    | 6150.084  | 61.154  | 30.8   |
| 12    | 5937.980  | 59.045  | 21.7   |
| 13    | 5347.447  | 53.173  | 19.4   |
| 14    | 5142.973  | 51.140  | 19.3   |
| 15    | 2484.048  | 24.700  | 16.4   |
| 16    | 2163.603  | 21.514  | 20.5   |
| 17    | 1434.974  | 14.269  | 33.1   |

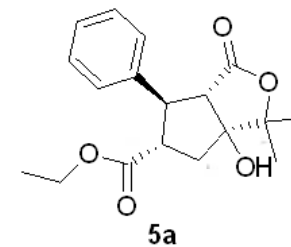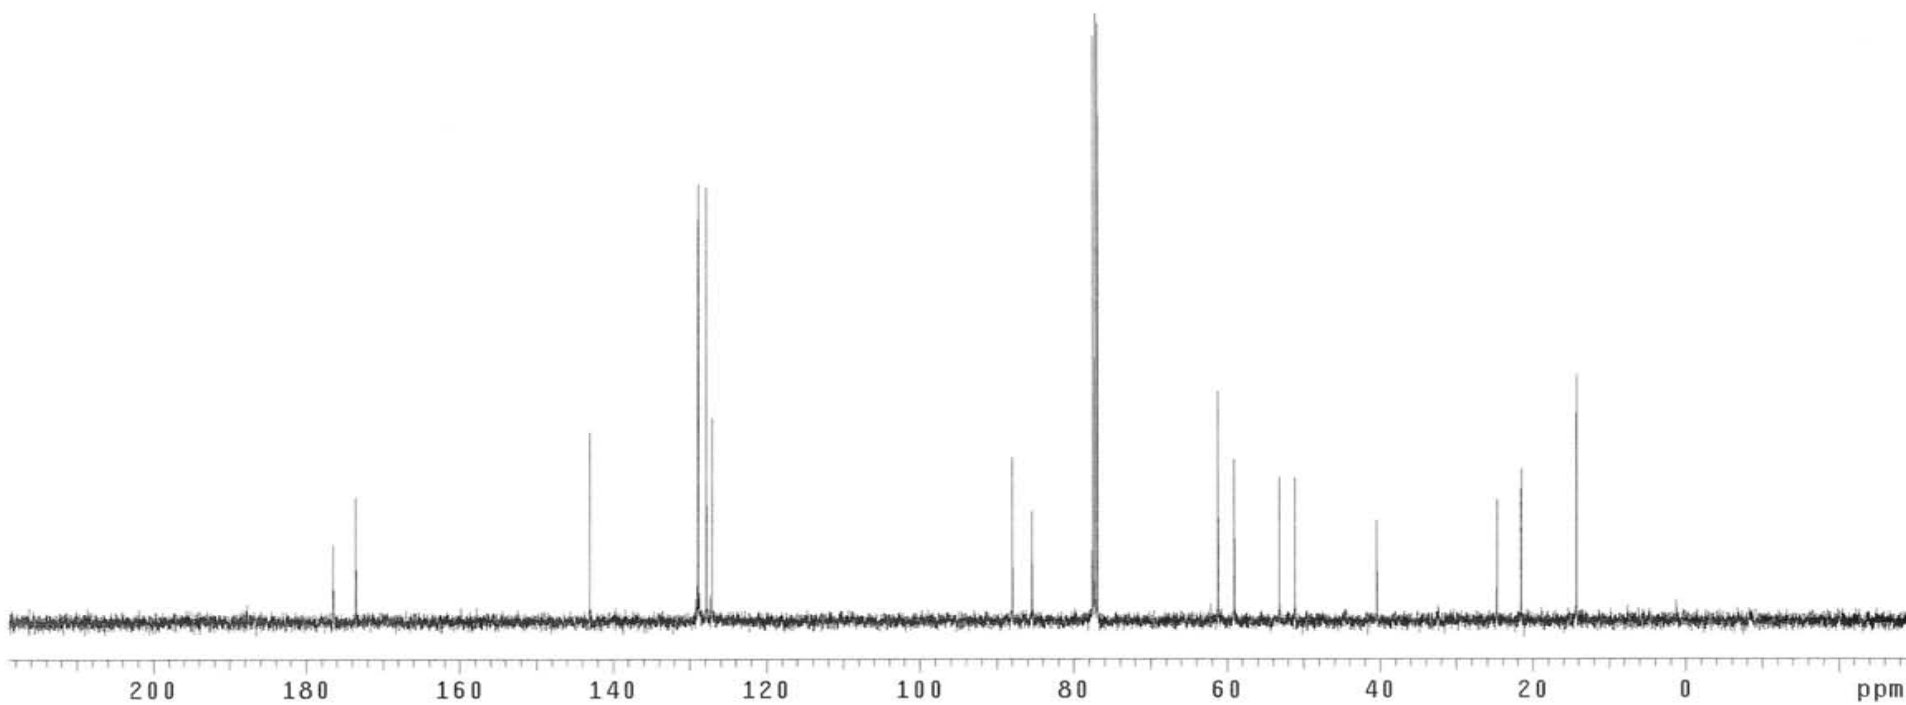

| INDEX | FREQUENCY | PPM   | HEIGHT |
|-------|-----------|-------|--------|
| 1     | 2918.874  | 7.298 | 49.6   |
| 2     | 552.174   | 1.381 | 107.7  |
| 3     | 546.646   | 1.367 | 111.7  |
| 4     | 438.545   | 1.097 | 72.4   |

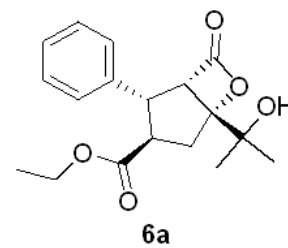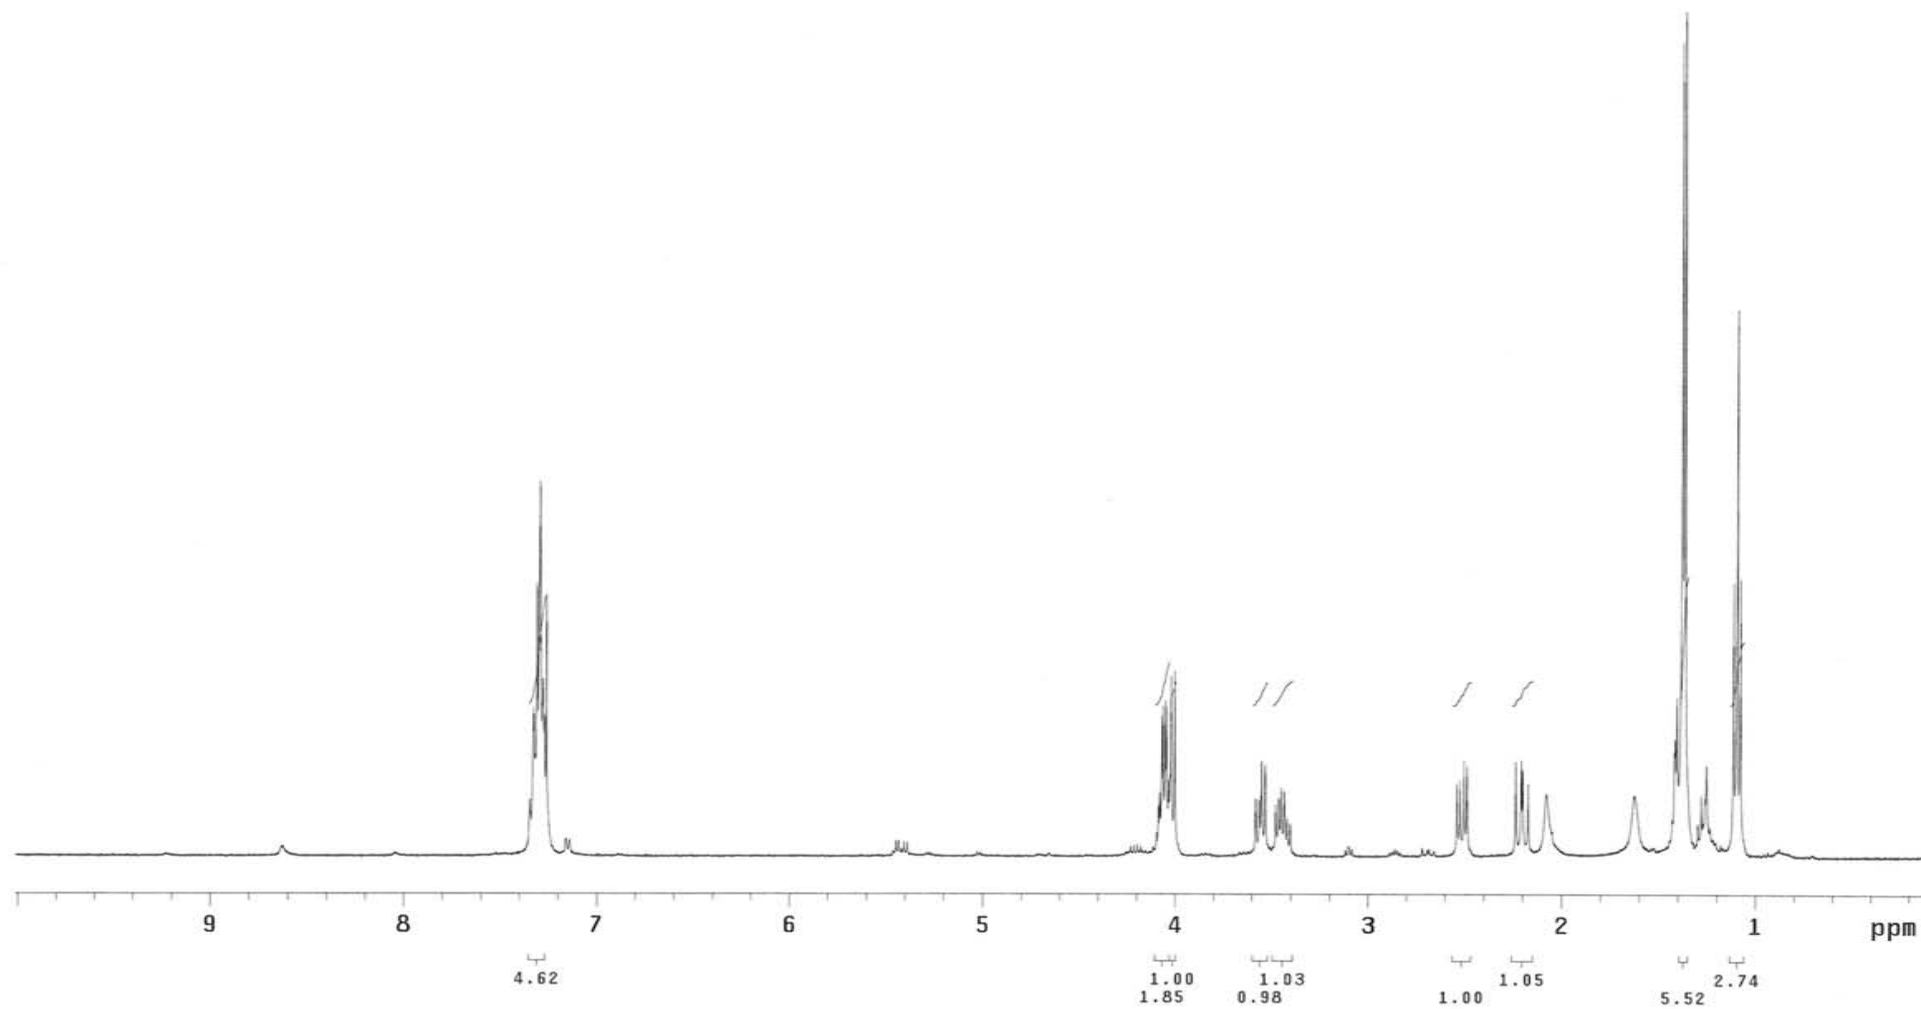

Bode, J. & Kaebamrung, J.

"Stereodivergency of Triazolium..."

| INDEX | FREQUENCY | PPM     | HEIGHT |
|-------|-----------|---------|--------|
| 1     | 12948.844 | 128.758 | 31.8   |
| 2     | 12883.229 | 128.106 | 29.5   |
| 3     | 7798.846  | 77.549  | 173.8  |
| 4     | 7766.801  | 77.230  | 175.1  |
| 5     | 7735.520  | 76.919  | 175.7  |

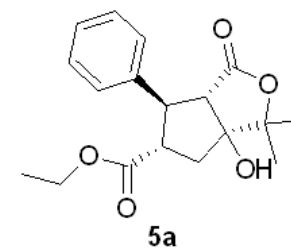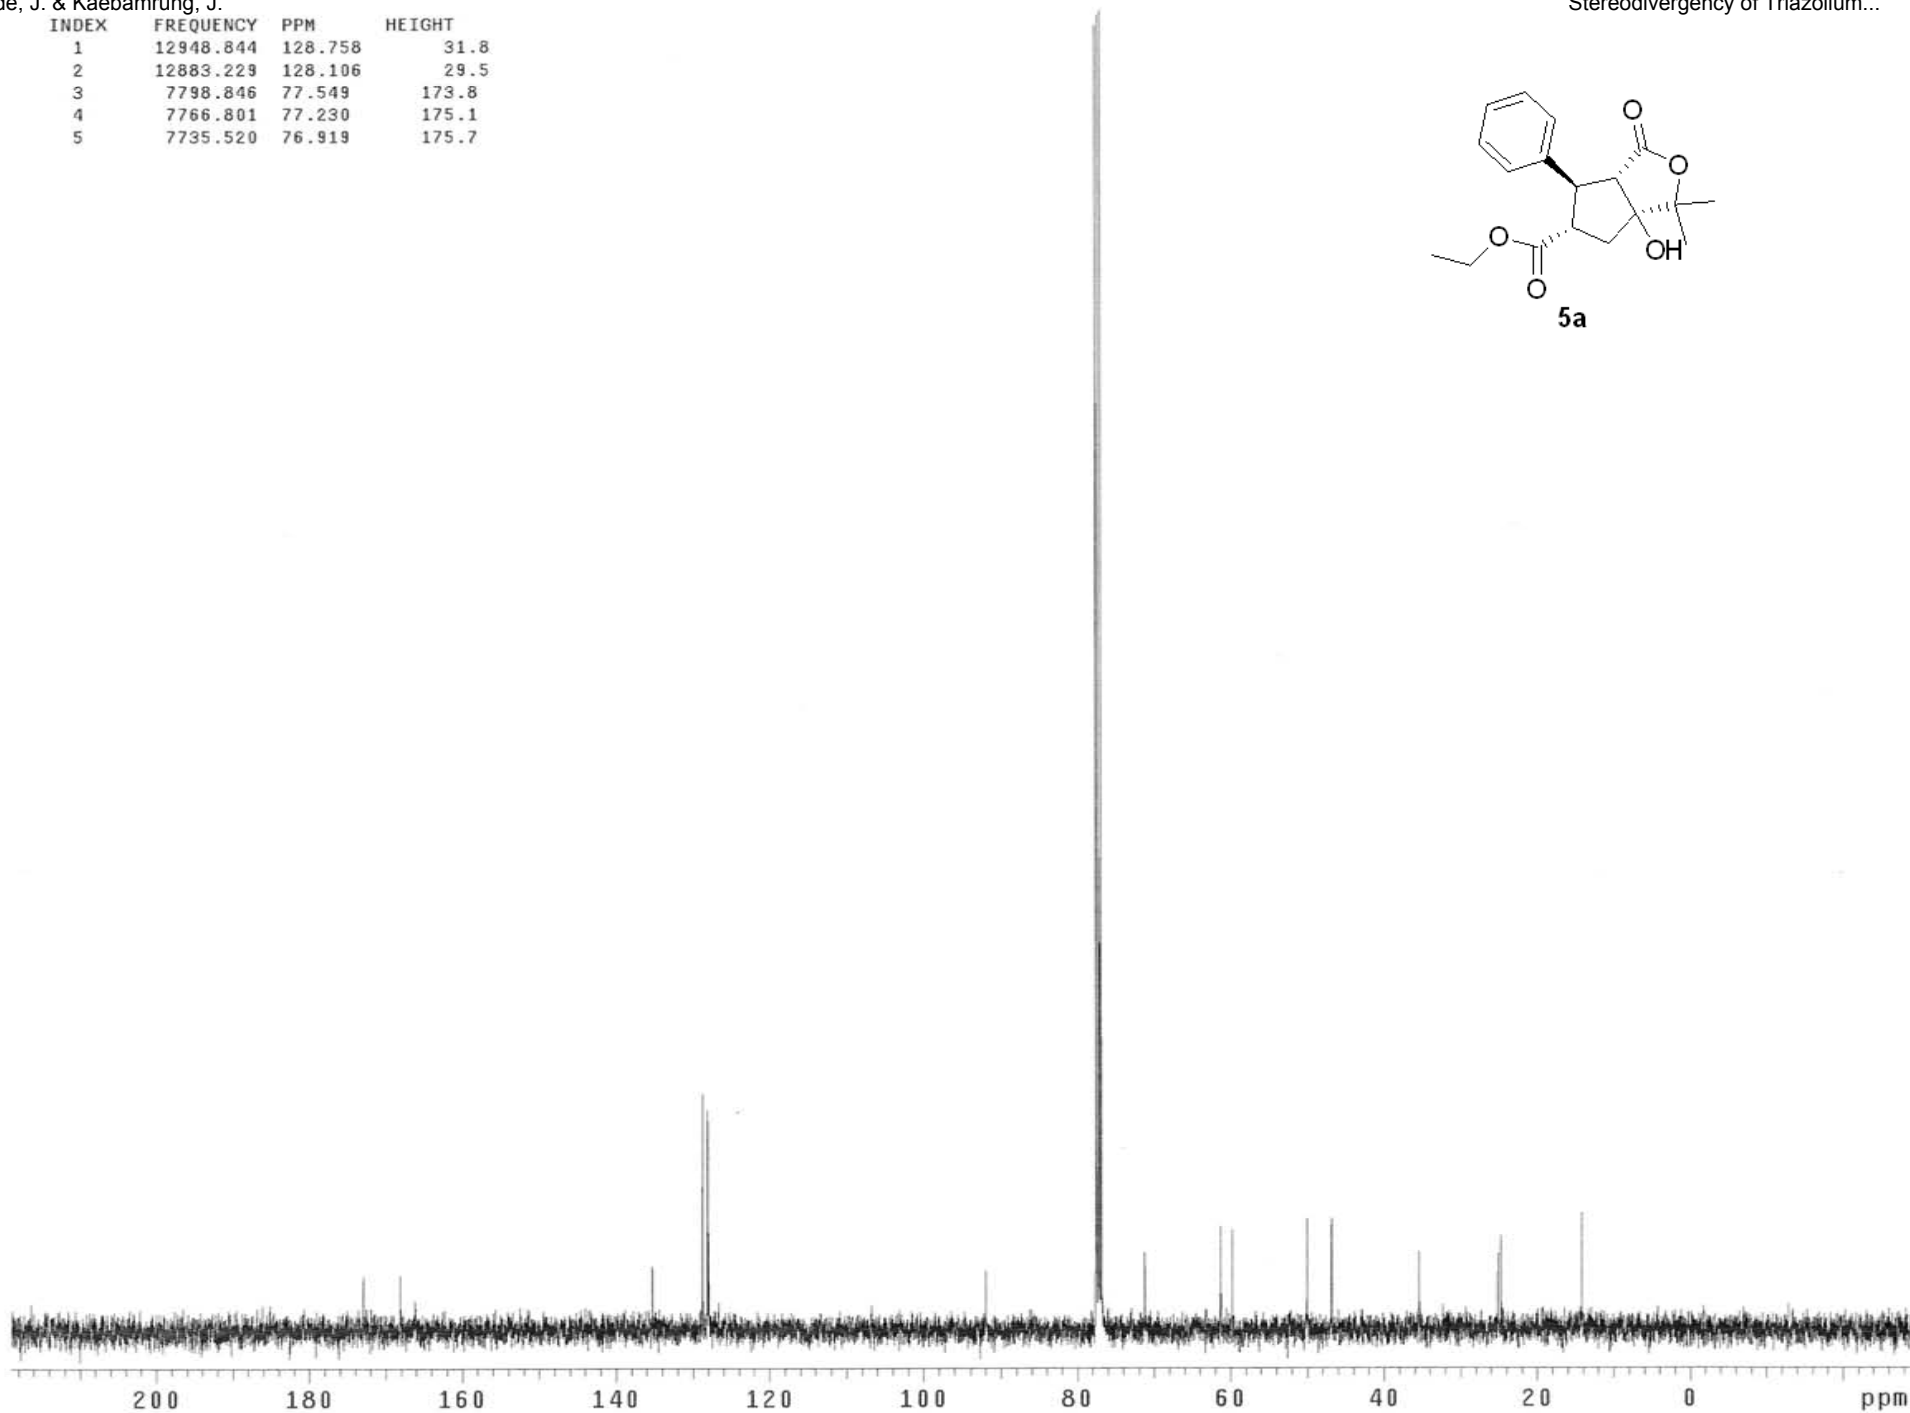

| INDEX | FREQUENCY | PPM   | HEIGHT |
|-------|-----------|-------|--------|
| 1     | 2904.441  | 7.262 | 62.2   |
| 2     | 1505.426  | 3.764 | 151.2  |
| 3     | 577.663   | 1.444 | 92.3   |
| 4     | 553.095   | 1.383 | 90.9   |
| 5     | 398.621   | 0.997 | 72.7   |

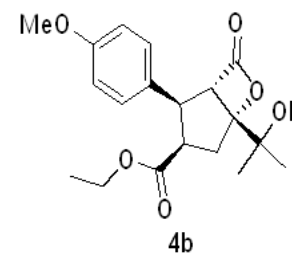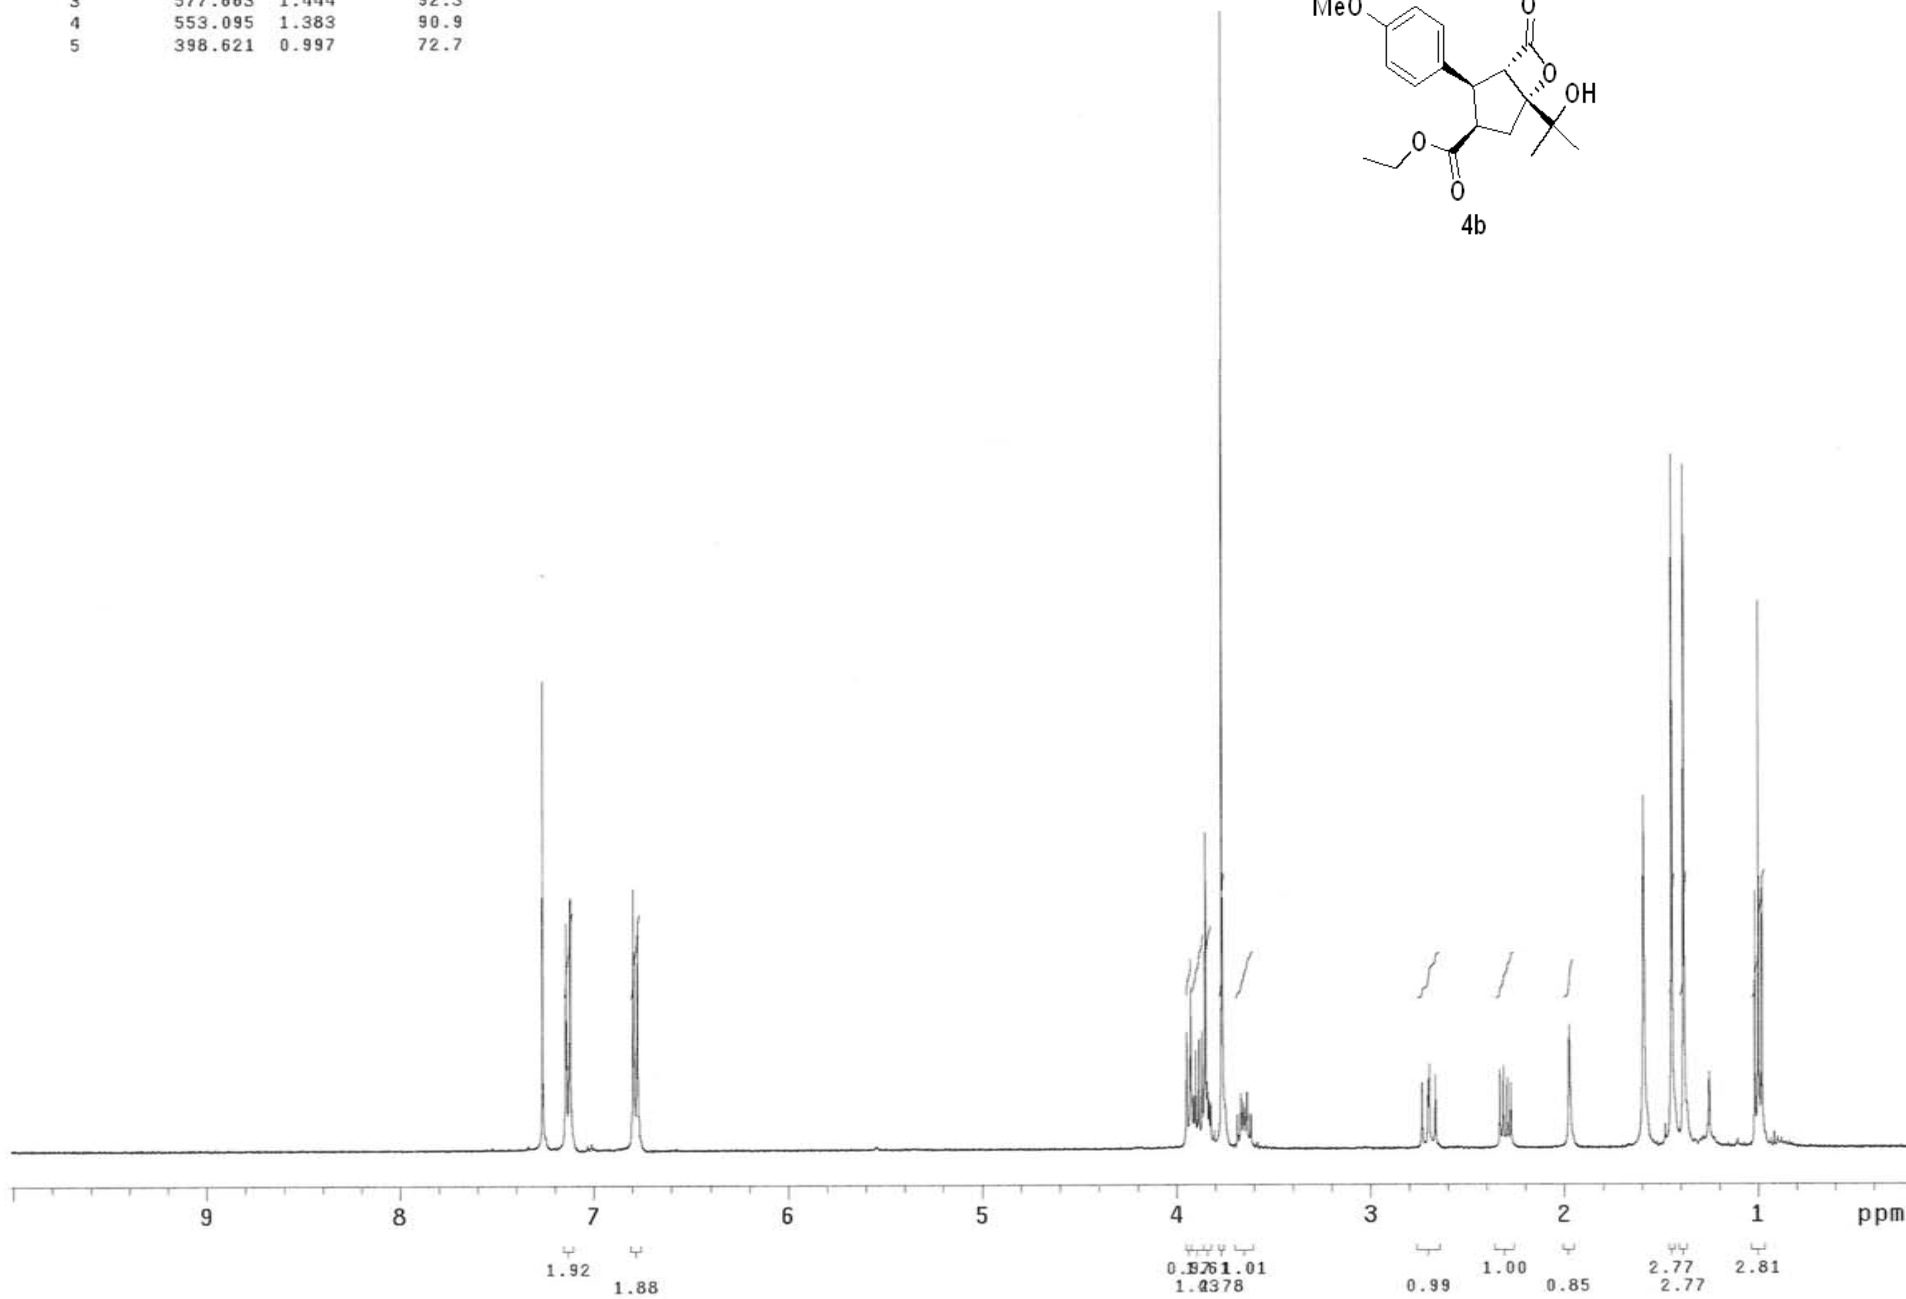

| INDEX | FREQUENCY | PPM     | HEIGHT |
|-------|-----------|---------|--------|
| 1     | 17226.013 | 171.289 | 25.8   |
| 2     | 17094.784 | 169.984 | 15.5   |
| 3     | 15977.043 | 158.869 | 26.9   |
| 4     | 13187.652 | 131.133 | 31.4   |
| 5     | 12983.178 | 129.100 | 68.0   |
| 6     | 11461.067 | 113.964 | 67.2   |
| 7     | 9496.438  | 94.429  | 26.9   |
| 8     | 7798.846  | 77.549  | 78.6   |
| 9     | 7766.801  | 77.230  | 81.0   |
| 10    | 7734.757  | 76.911  | 76.4   |
| 11    | 7186.187  | 71.457  | 26.3   |
| 12    | 6217.224  | 61.822  | 27.0   |
| 13    | 6126.432  | 60.919  | 36.0   |
| 14    | 5564.891  | 55.335  | 37.3   |
| 15    | 4856.862  | 48.295  | 32.6   |
| 16    | 4705.032  | 46.785  | 28.6   |
| 17    | 3181.395  | 31.635  | 17.2   |
| 18    | 2566.447  | 25.520  | 31.7   |
| 19    | 1415.137  | 14.072  | 39.7   |

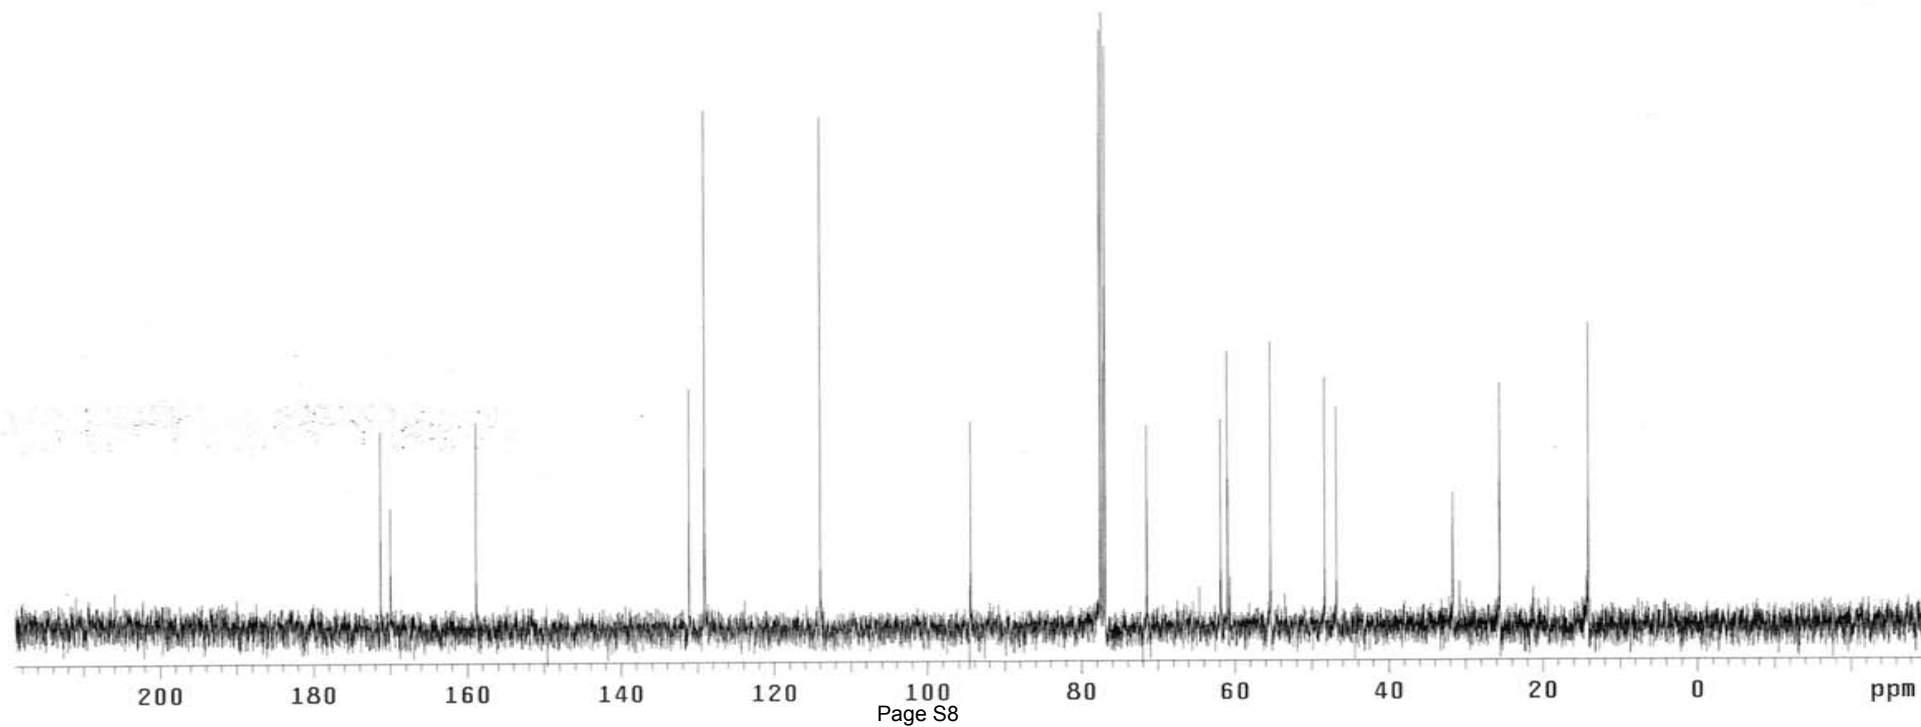



| INDEX | FREQUENCY | PPM   | HEIGHT |
|-------|-----------|-------|--------|
| 1     | 1514.332  | 3.786 | 151.2  |
| 2     | 581.349   | 1.454 | 87.6   |
| 3     | 575.514   | 1.439 | 102.4  |
| 4     | 472.634   | 1.182 | 74.9   |

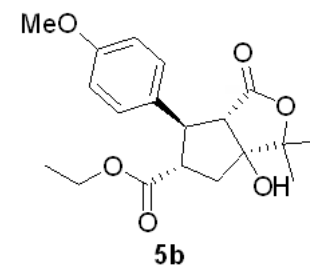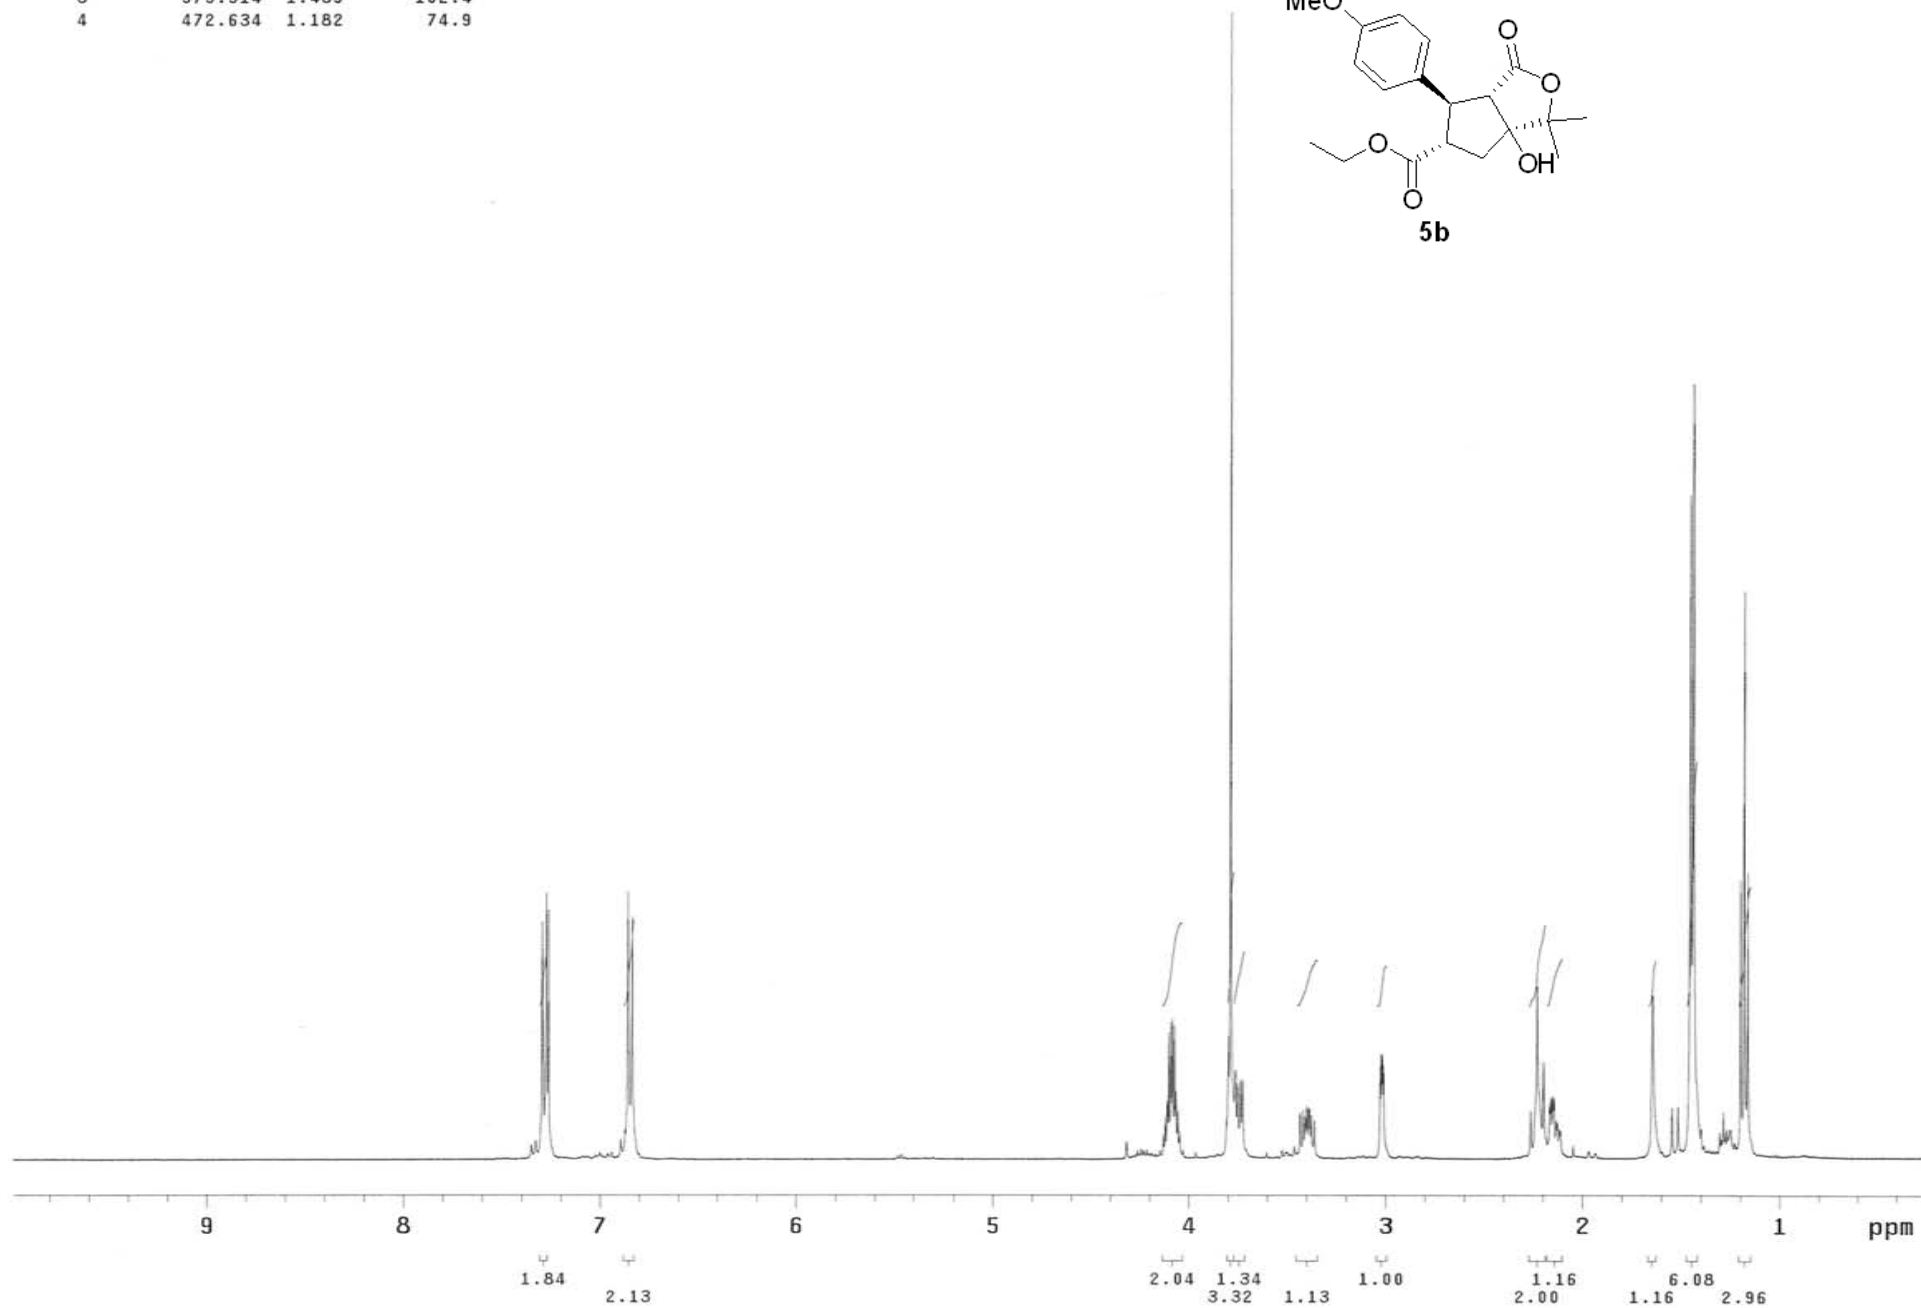

| INDEX | FREQUENCY | PPM     | HEIGHT |
|-------|-----------|---------|--------|
| 1     | 12959.526 | 128.864 | 39.7   |
| 2     | 11492.348 | 114.275 | 35.6   |
| 3     | 7798.846  | 77.549  | 155.3  |
| 4     | 7766.801  | 77.230  | 162.0  |
| 5     | 7734.757  | 76.911  | 161.1  |
| 6     | 1441.840  | 14.337  | 20.4   |

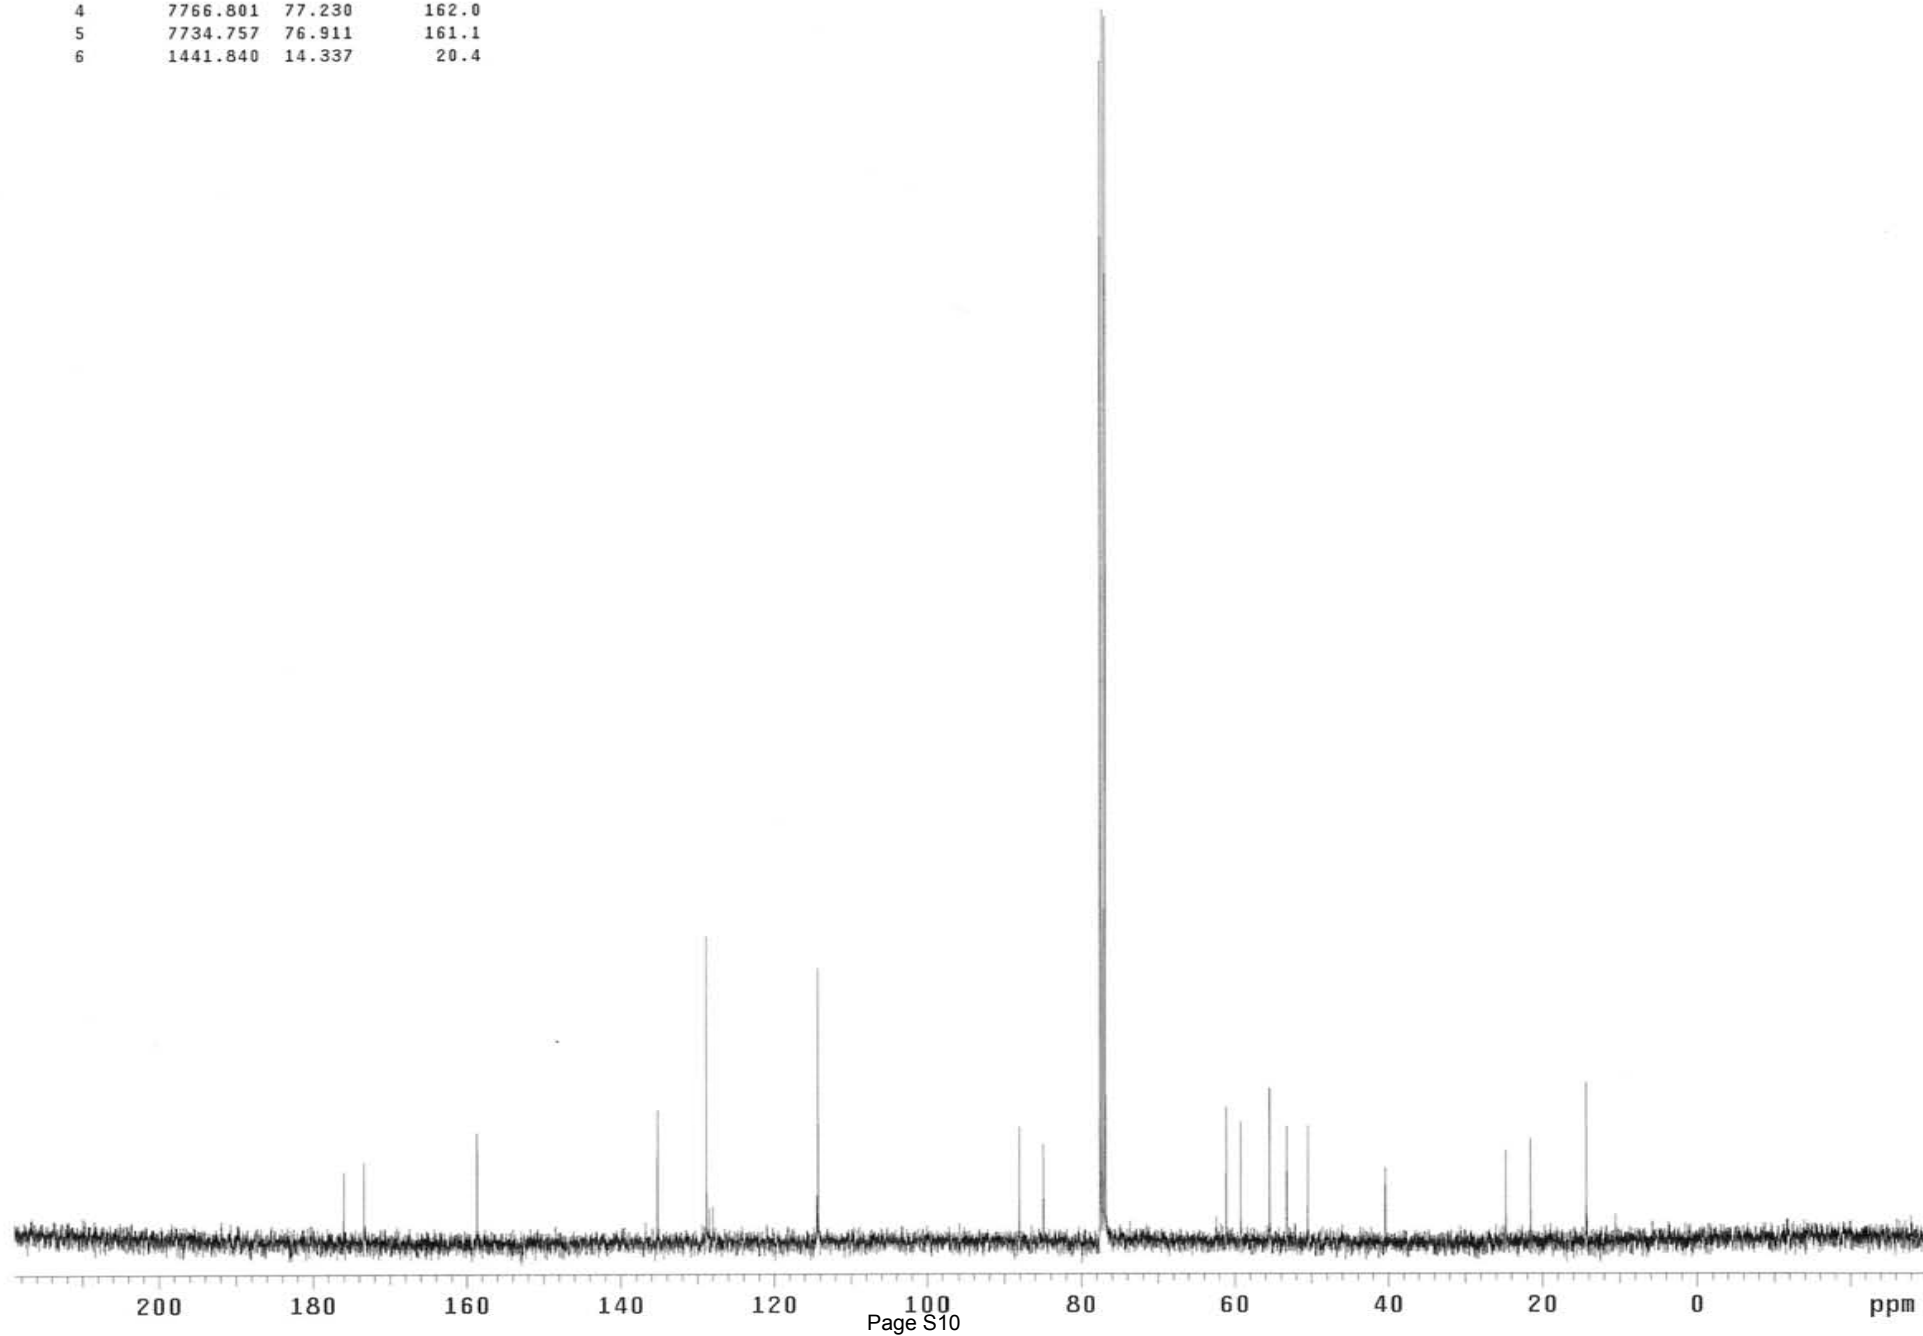

| INDEX | FREQUENCY | PPM   | HEIGHT |
|-------|-----------|-------|--------|
| 1     | 2904.594  | 7.262 | 75.6   |
| 2     | 1515.253  | 3.789 | 151.2  |
| 3     | 636.167   | 1.591 | 64.0   |
| 4     | 550.024   | 1.375 | 91.2   |
| 5     | 543.728   | 1.359 | 94.7   |
| 6     | 444.073   | 1.110 | 72.2   |

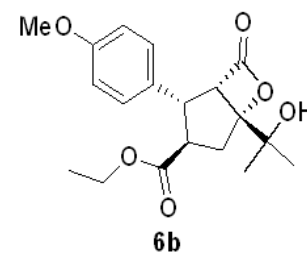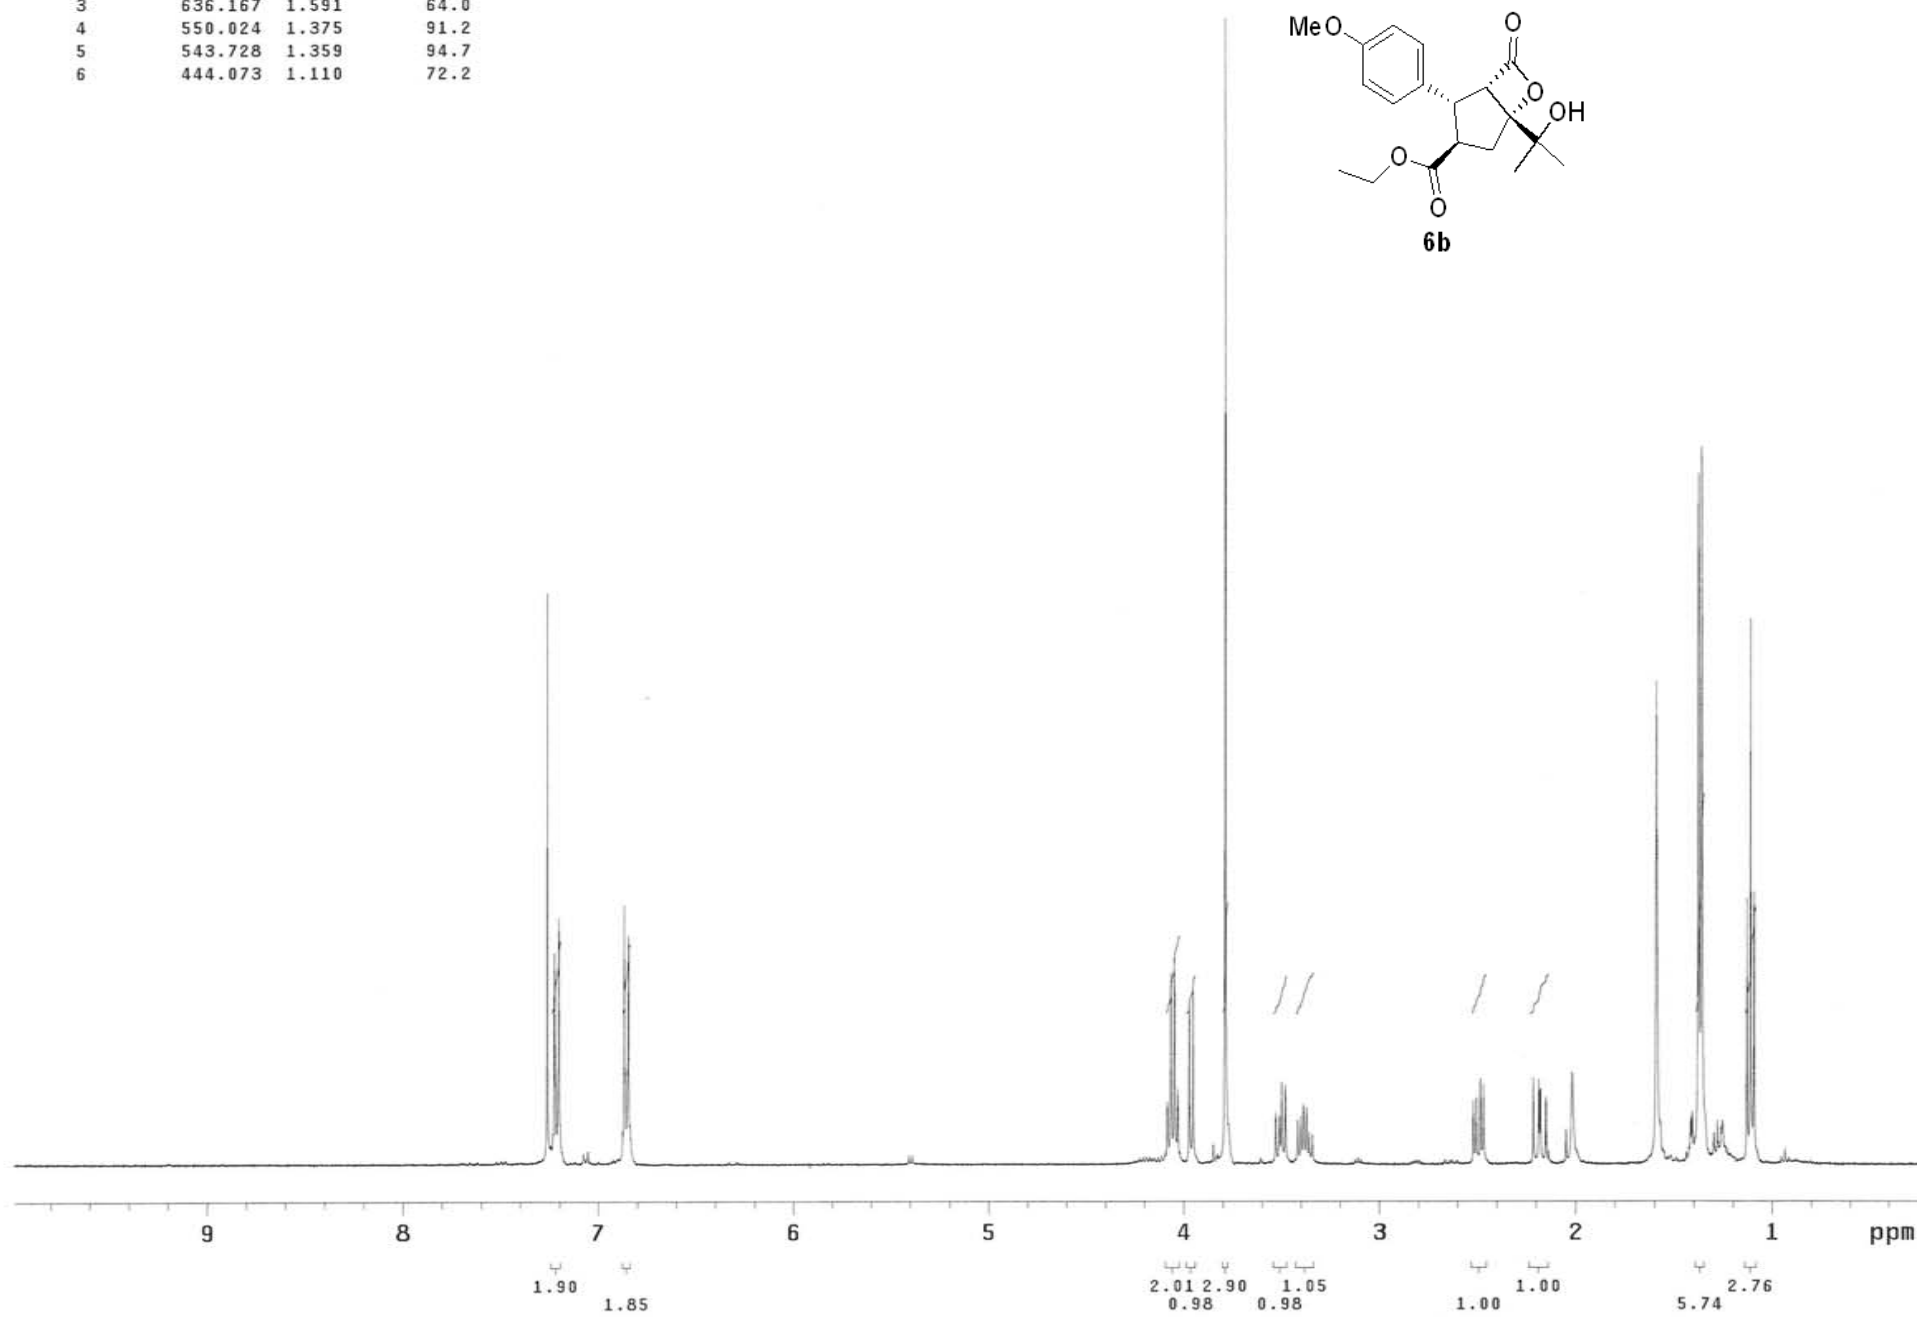

| INDEX | FREQUENCY | PPM     | HEIGHT |
|-------|-----------|---------|--------|
| 1     | 17399.206 | 173.011 | 14.3   |
| 2     | 16923.117 | 168.277 | 13.8   |
| 3     | 16014.428 | 159.241 | 14.6   |
| 4     | 12993.859 | 129.206 | 48.8   |
| 5     | 12795.489 | 127.233 | 18.1   |
| 6     | 11479.378 | 114.146 | 52.5   |
| 7     | 9253.053  | 92.009  | 17.0   |
| 8     | 7798.846  | 77.549  | 638.5  |
| 9     | 7787.401  | 77.435  | 26.4   |
| 10    | 7766.801  | 77.230  | 648.0  |
| 11    | 7734.757  | 76.911  | 628.3  |
| 12    | 7163.298  | 71.229  | 20.9   |
| 13    | 6162.290  | 61.275  | 22.9   |
| 14    | 6015.039  | 59.811  | 18.9   |
| 15    | 5572.520  | 55.411  | 20.1   |
| 16    | 4972.832  | 49.448  | 20.7   |
| 17    | 4741.654  | 47.149  | 20.7   |
| 18    | 3560.588  | 35.405  | 13.0   |
| 19    | 2524.484  | 25.102  | 13.7   |
| 20    | 2483.284  | 24.693  | 15.3   |
| 21    | 1432.684  | 14.246  | 23.6   |

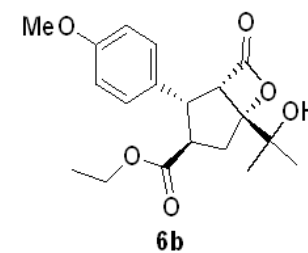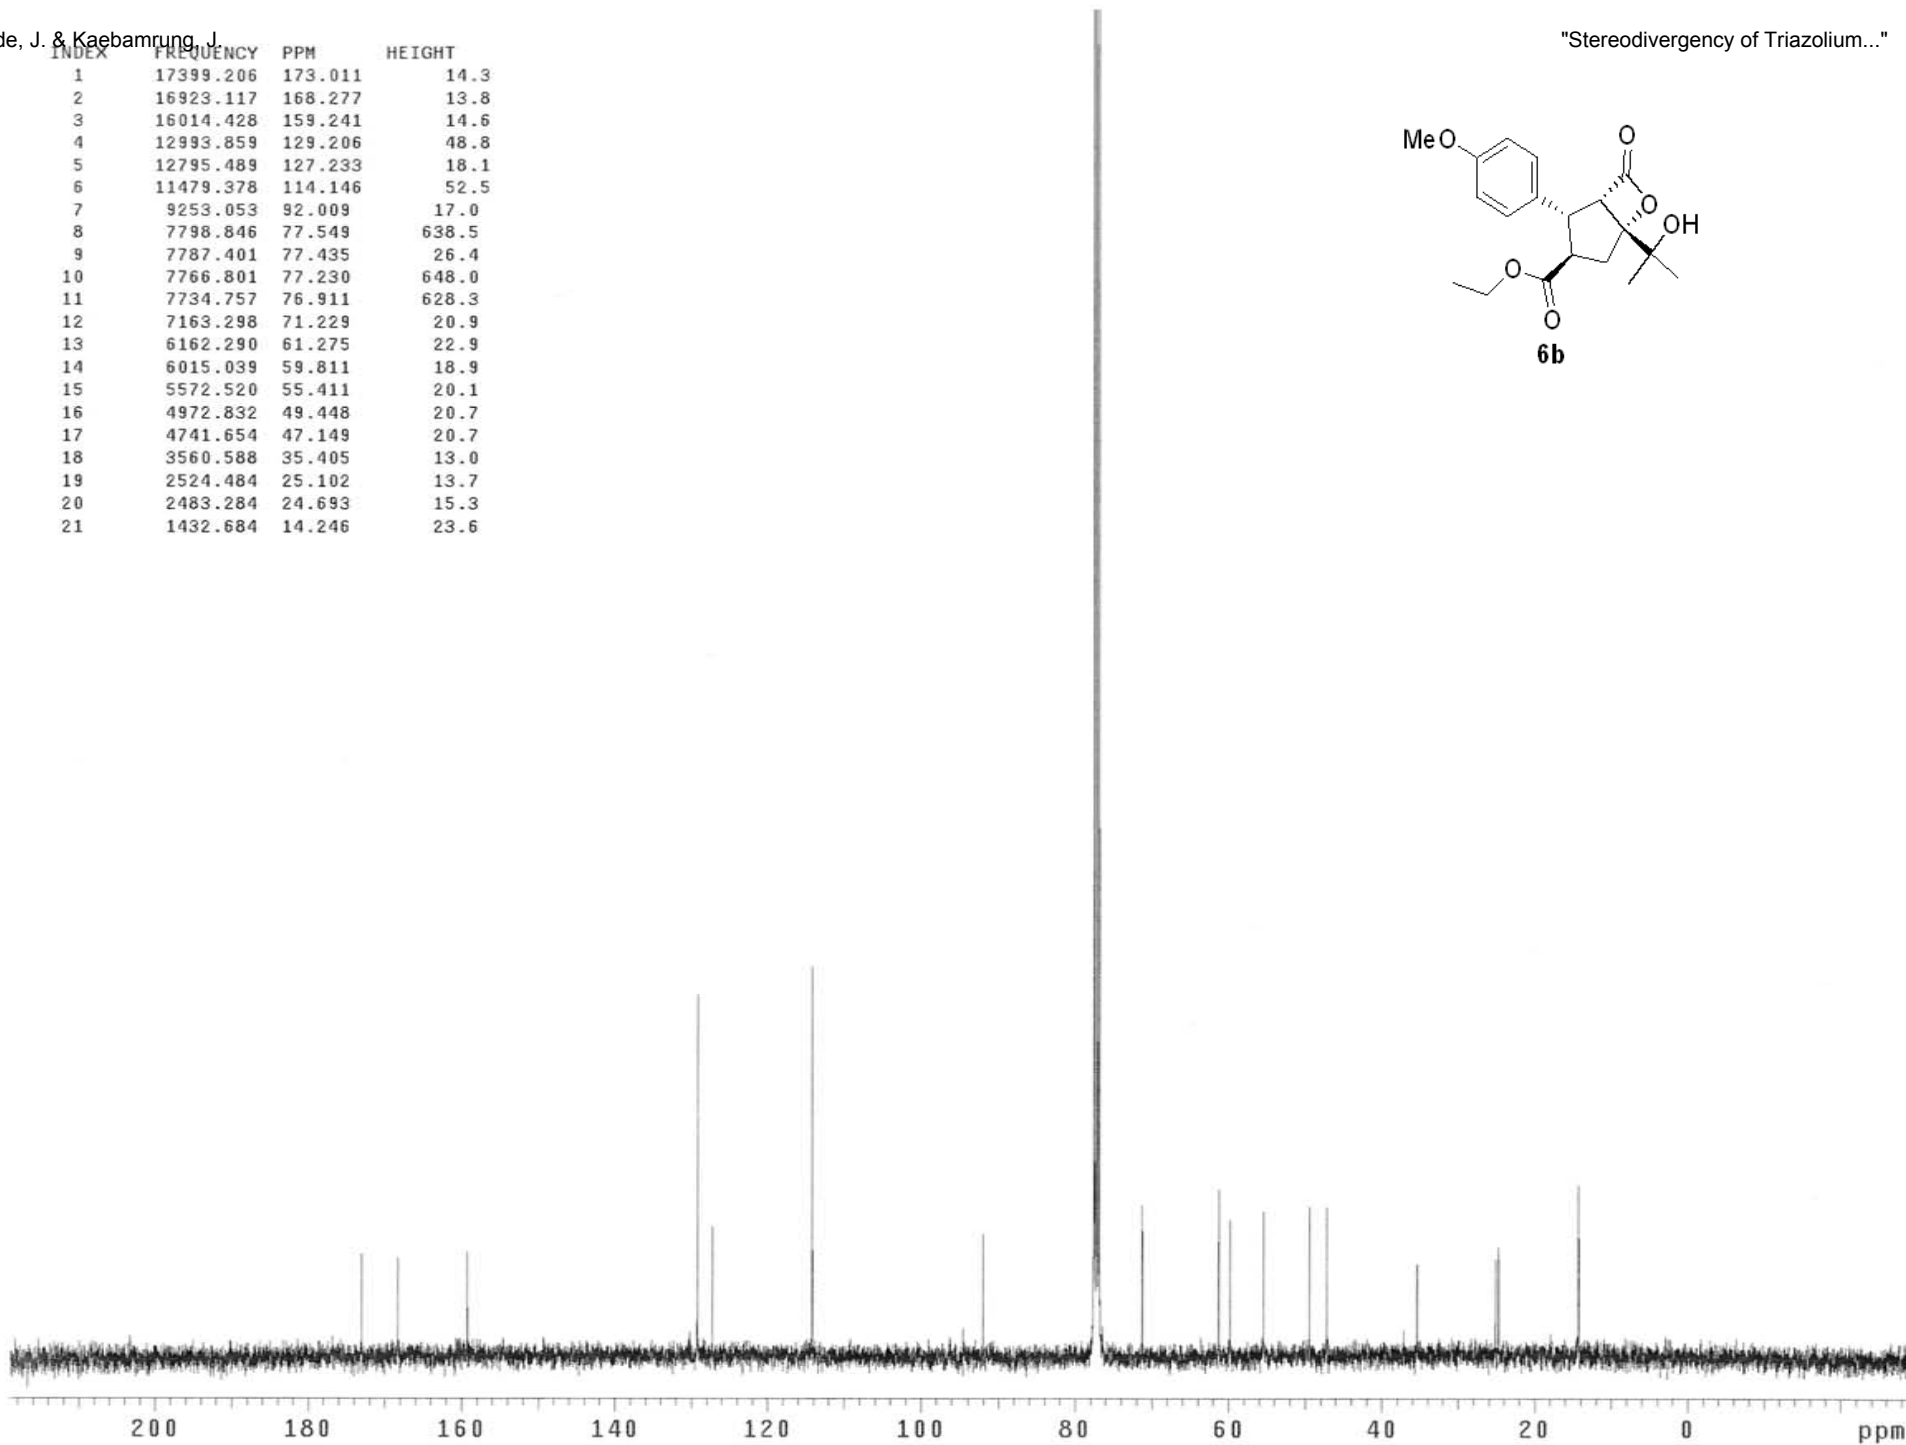

| INDEX | FREQUENCY | PPM   | HEIGHT |
|-------|-----------|-------|--------|
| 1     | 2958.798  | 7.398 | 52.1   |
| 2     | 2950.353  | 7.377 | 61.2   |
| 3     | 2852.233  | 7.131 | 57.6   |
| 4     | 2843.634  | 7.110 | 49.3   |
| 5     | 1540.589  | 3.852 | 62.4   |
| 6     | 575.667   | 1.439 | 151.2  |
| 7     | 548.795   | 1.372 | 149.0  |
| 8     | 409.831   | 1.025 | 61.2   |
| 9     | 402.767   | 1.007 | 128.0  |
| 10    | 395.550   | 0.989 | 59.7   |

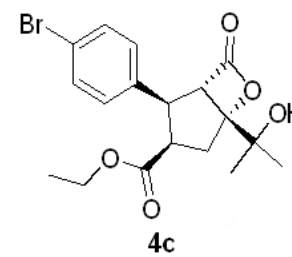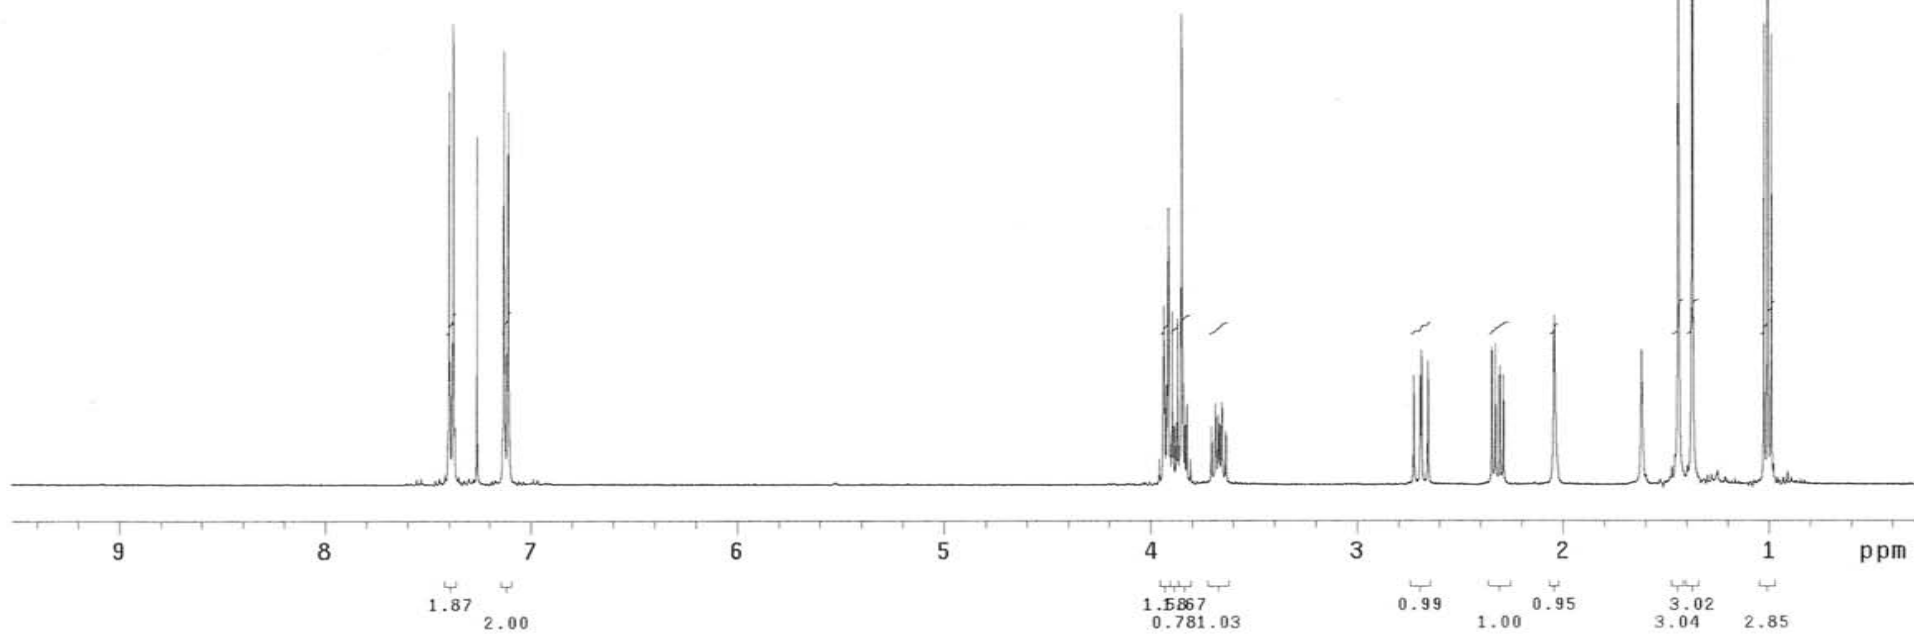

| INDEX | FREQUENCY | PPM     | HEIGHT |
|-------|-----------|---------|--------|
| 1     | 17193.206 | 170.962 | 24.7   |
| 2     | 13889.577 | 138.112 | 28.0   |
| 3     | 13257.081 | 131.823 | 81.0   |
| 4     | 13053.370 | 129.798 | 76.6   |
| 5     | 12237.000 | 121.680 | 25.0   |
| 6     | 9472.786  | 94.194  | 21.5   |
| 7     | 7798.846  | 77.549  | 56.8   |
| 8     | 7766.801  | 77.230  | 58.9   |
| 9     | 7734.757  | 76.911  | 57.6   |
| 10    | 7183.135  | 71.426  | 26.9   |
| 11    | 6185.180  | 61.503  | 30.6   |
| 12    | 6147.032  | 61.124  | 36.3   |
| 13    | 4842.365  | 48.151  | 32.4   |
| 14    | 4717.239  | 46.906  | 32.3   |
| 15    | 3170.714  | 31.528  | 21.0   |
| 16    | 2574.077  | 25.596  | 24.8   |
| 17    | 2564.921  | 25.505  | 24.9   |
| 18    | 1415.900  | 14.079  | 37.8   |

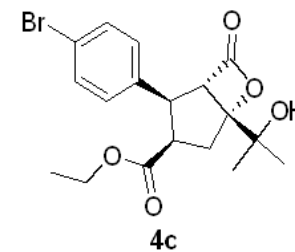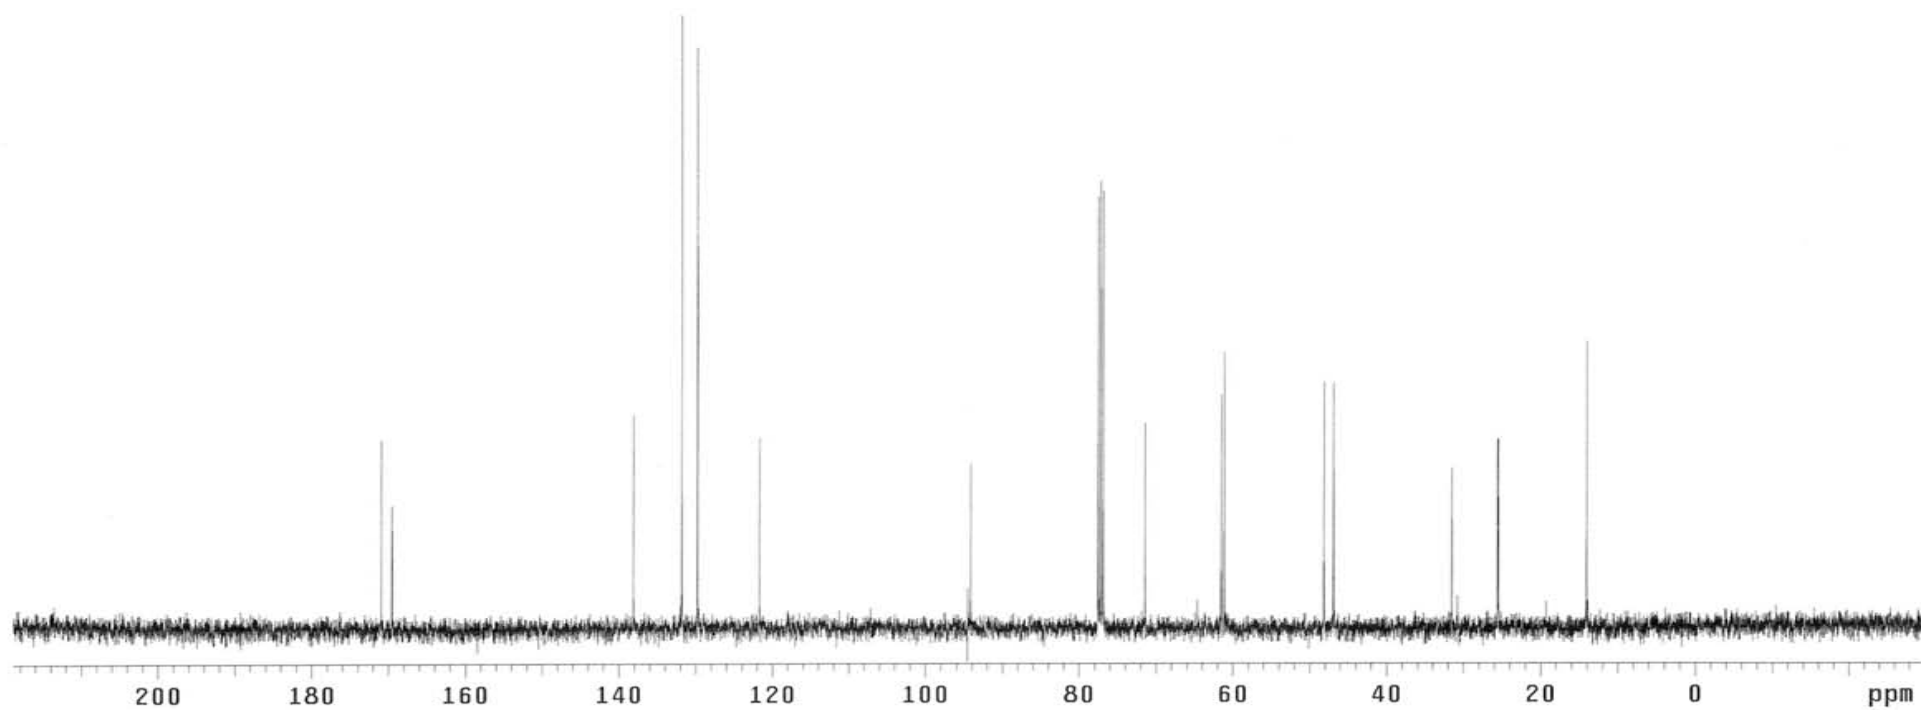

| INDEX | FREQUENCY | PPM   | HEIGHT |
|-------|-----------|-------|--------|
| 1     | 2975.190  | 7.439 | 59.9   |
| 2     | 2909.469  | 7.275 | 58.5   |
| 3     | 2906.552  | 7.267 | 109.4  |
| 4     | 2901.024  | 7.253 | 50.8   |
| 5     | 589.756   | 1.475 | 135.8  |
| 6     | 582.232   | 1.456 | 151.2  |
| 7     | 483.805   | 1.210 | 58.3   |
| 8     | 476.741   | 1.192 | 121.8  |
| 9     | 469.524   | 1.174 | 60.1   |

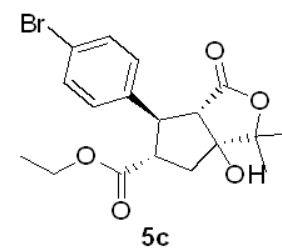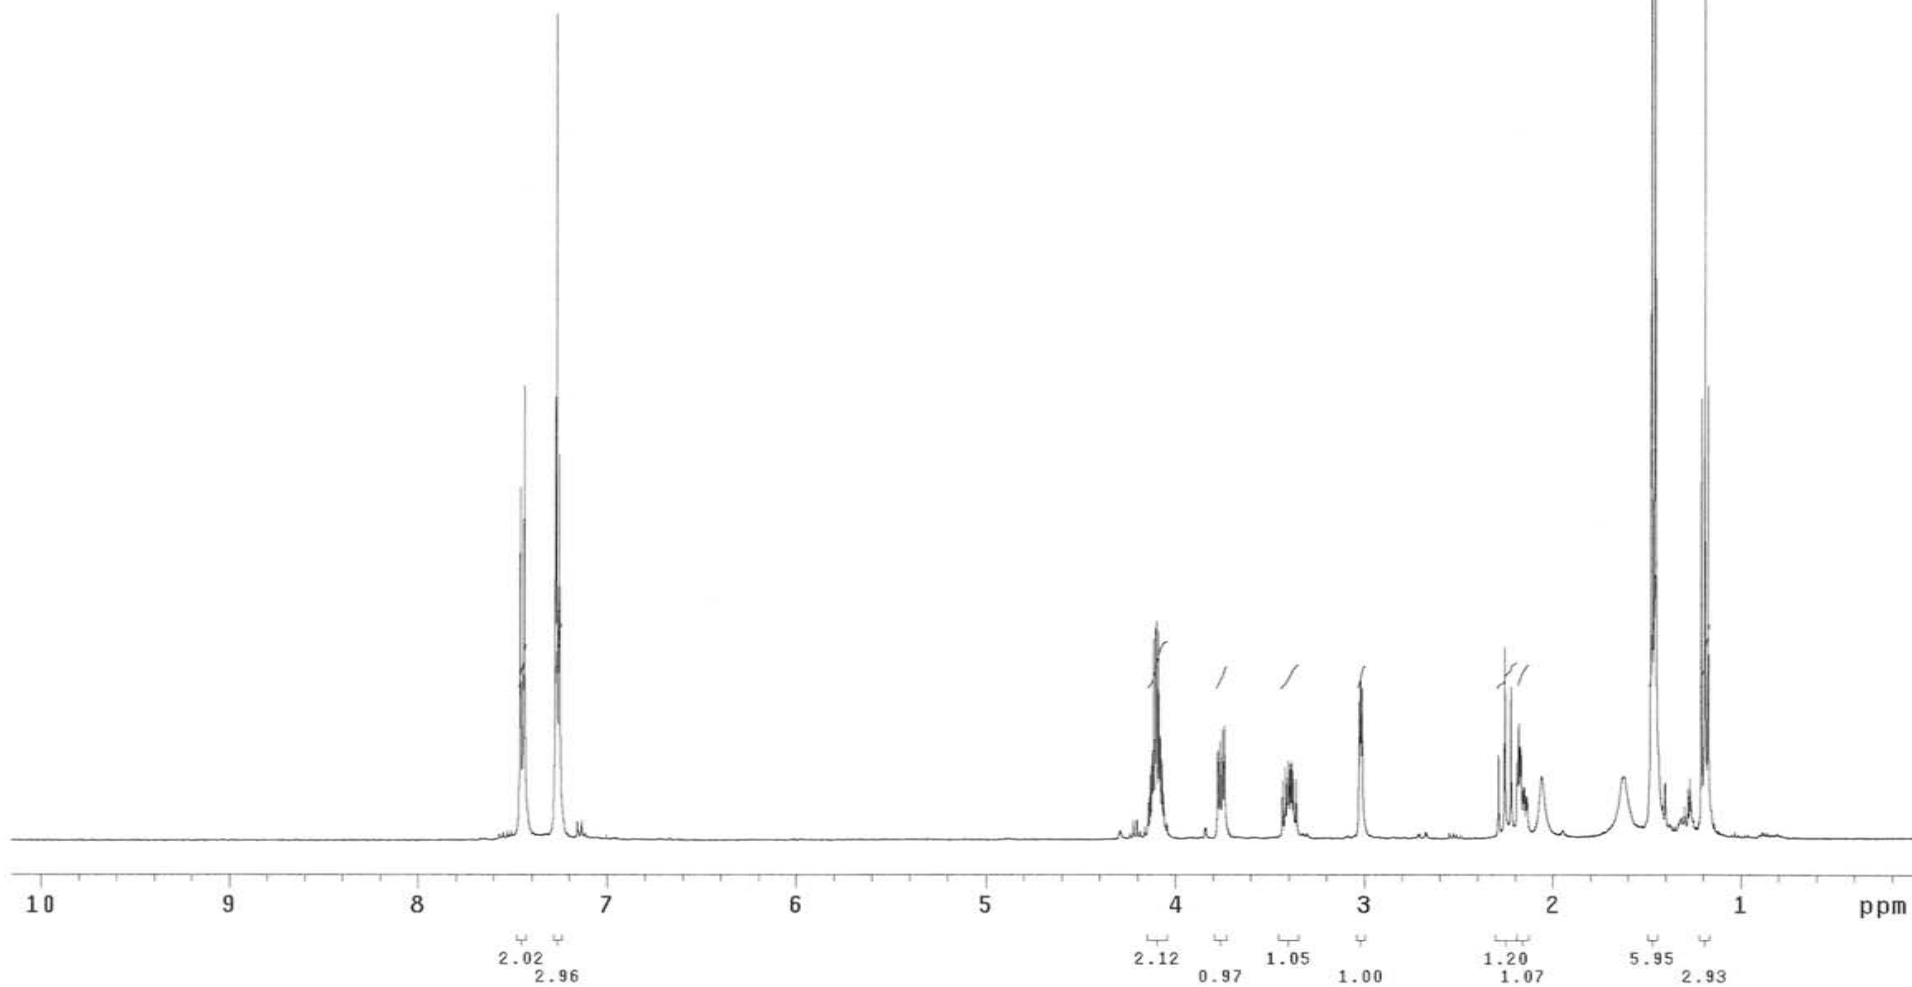

| INDEX | FREQUENCY | PPM     | HEIGHT |
|-------|-----------|---------|--------|
| 1     | 17667.006 | 175.674 | 8.5    |
| 2     | 17401.495 | 173.034 | 10.4   |
| 3     | 14296.236 | 142.156 | 14.2   |
| 4     | 13279.207 | 132.043 | 43.6   |
| 5     | 13041.926 | 129.684 | 41.4   |
| 6     | 12177.489 | 121.088 | 12.0   |
| 7     | 8864.705  | 88.147  | 14.1   |
| 8     | 8557.231  | 85.090  | 11.6   |
| 9     | 7798.083  | 77.541  | 126.0  |
| 10    | 7766.038  | 77.222  | 124.2  |
| 11    | 7733.994  | 76.904  | 120.4  |
| 12    | 6163.817  | 61.291  | 18.8   |
| 13    | 5931.113  | 58.977  | 13.7   |
| 14    | 5339.817  | 53.097  | 13.0   |
| 15    | 5074.306  | 50.457  | 16.3   |
| 16    | 4065.669  | 40.427  | 9.3    |
| 17    | 2487.099  | 24.731  | 7.7    |
| 18    | 2168.181  | 21.560  | 12.7   |
| 19    | 1441.840  | 14.337  | 19.8   |

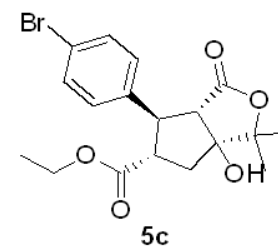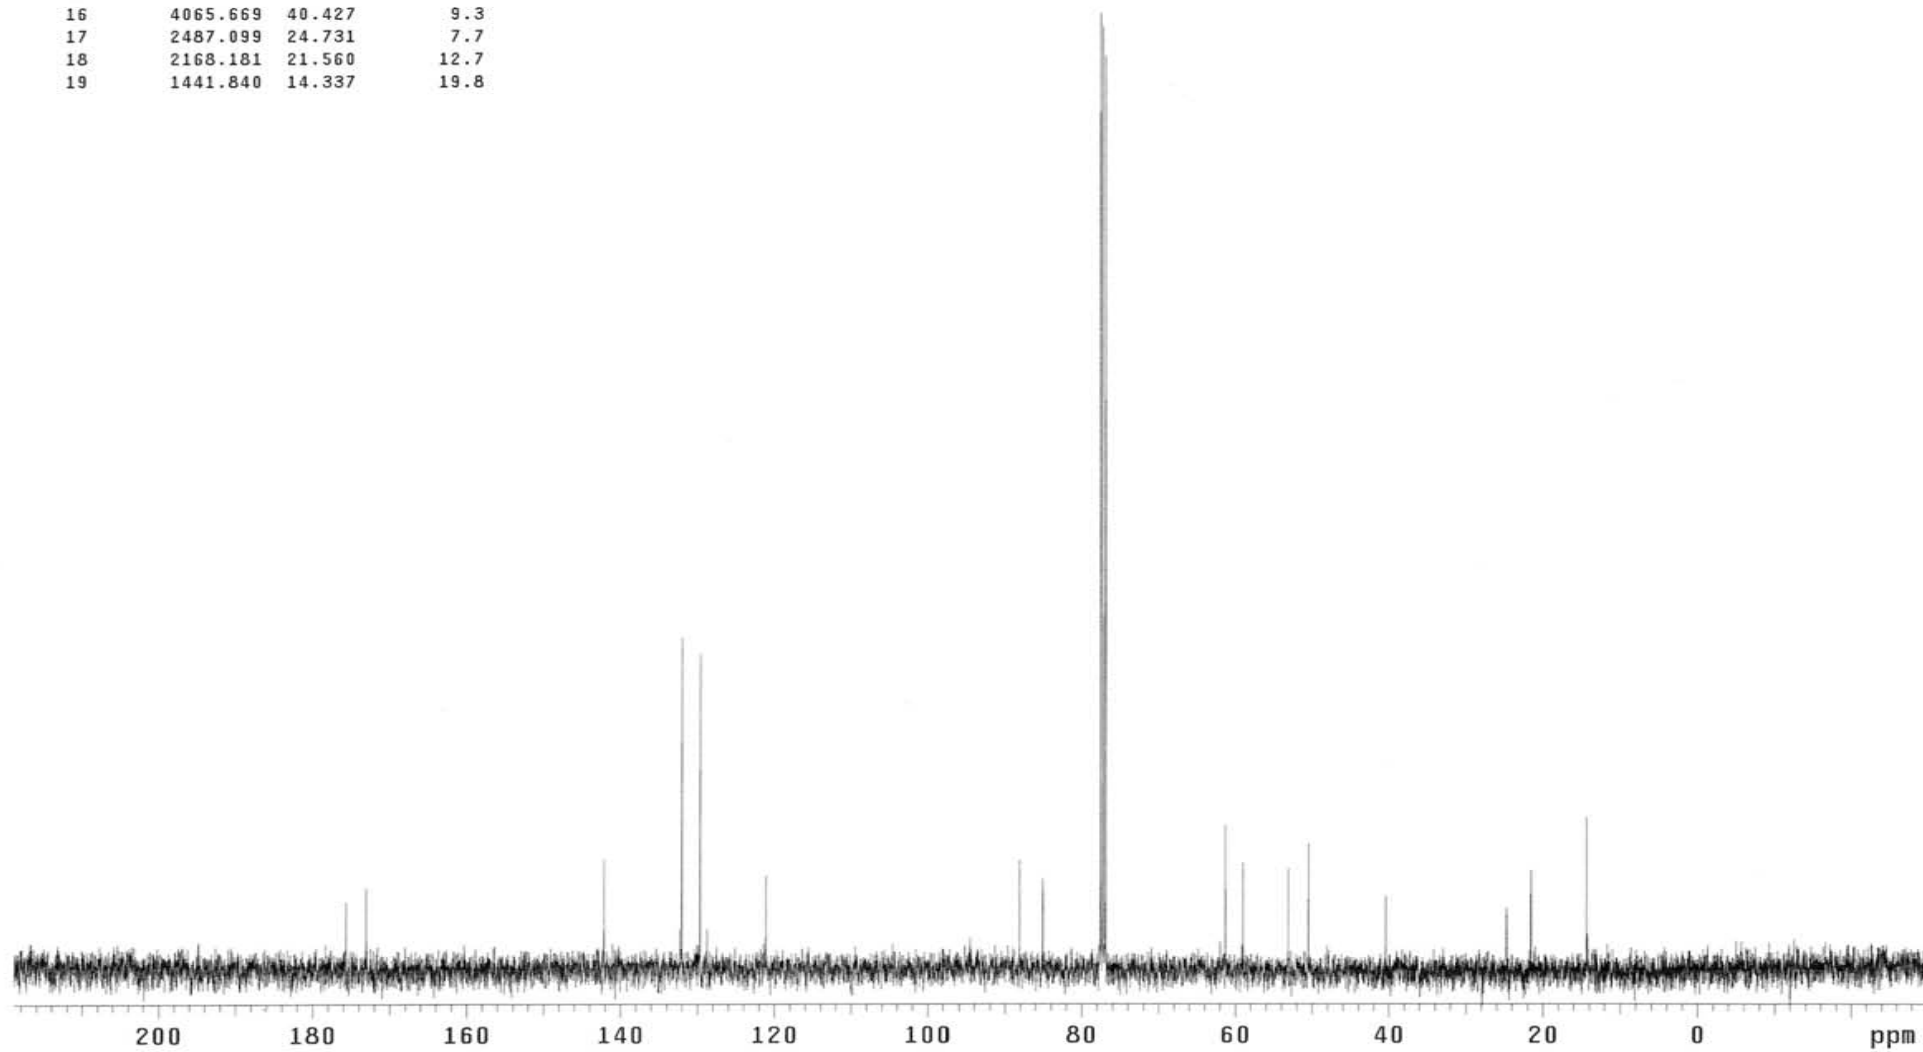



| INDEX | FREQUENCY | PPM   | HEIGHT |
|-------|-----------|-------|--------|
| 1     | 2985.363  | 7.464 | 53.0   |
| 2     | 2976.917  | 7.443 | 59.6   |
| 3     | 2904.748  | 7.263 | 81.2   |
| 4     | 2874.498  | 7.187 | 54.1   |
| 5     | 2866.052  | 7.166 | 48.4   |
| 6     | 1629.343  | 4.074 | 58.4   |
| 7     | 1622.279  | 4.056 | 59.7   |
| 8     | 550.792   | 1.377 | 151.0  |
| 9     | 542.500   | 1.356 | 151.2  |
| 10    | 455.743   | 1.140 | 60.0   |
| 11    | 448.679   | 1.122 | 125.3  |
| 12    | 441.616   | 1.104 | 60.2   |

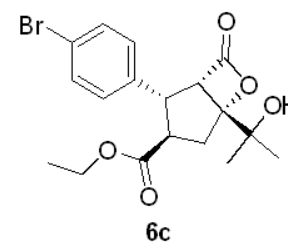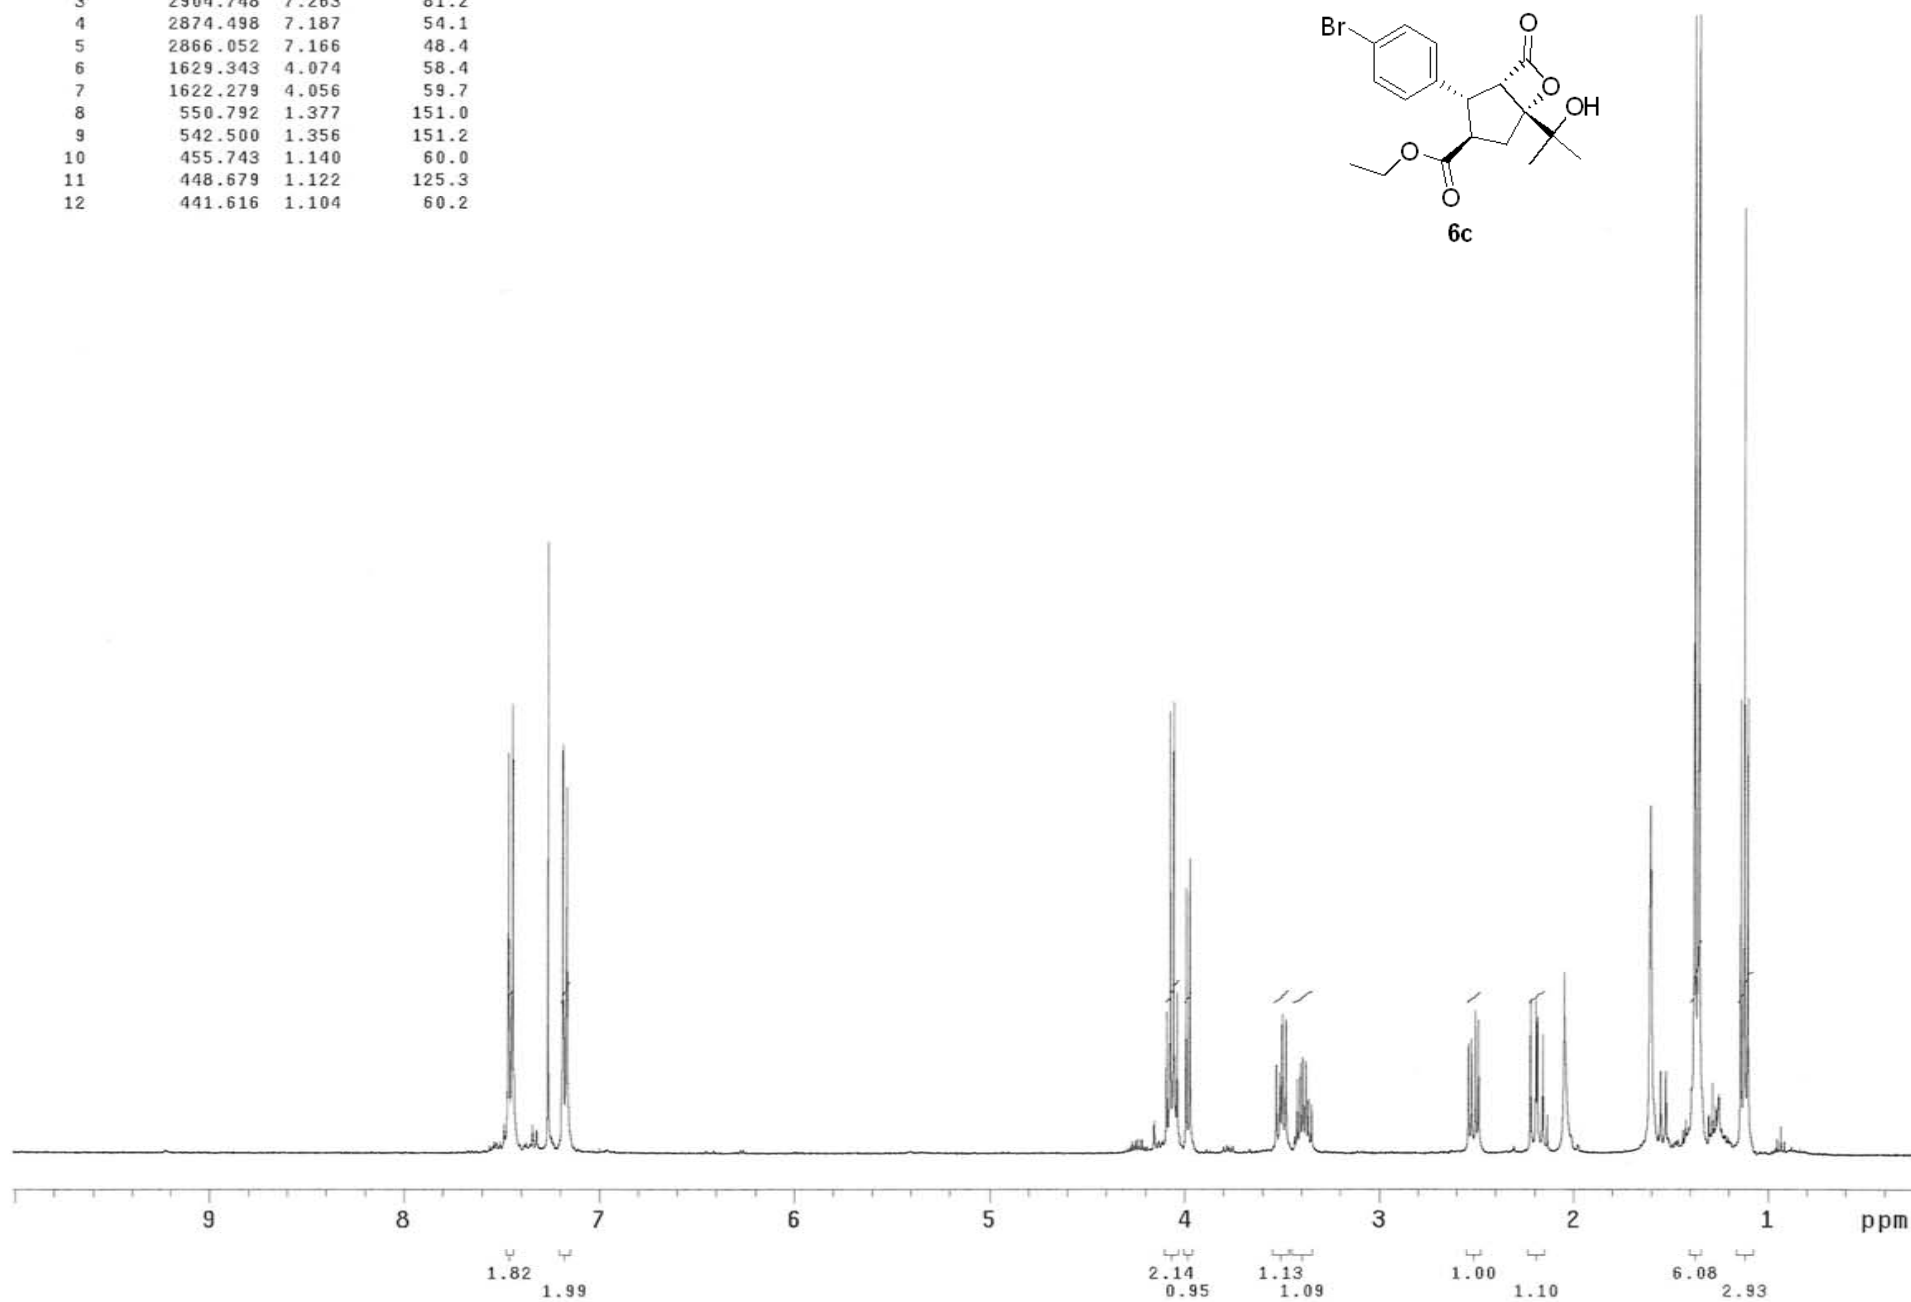

| INDEX | FREQUENCY | PPM     | HEIGHT |
|-------|-----------|---------|--------|
| 1     | 17364.109 | 172.662 | 9.8    |
| 2     | 16887.258 | 167.920 | 9.2    |
| 3     | 13517.251 | 134.410 | 12.2   |
| 4     | 13267.763 | 131.929 | 37.1   |
| 5     | 13061.000 | 129.873 | 31.6   |
| 6     | 12271.333 | 122.021 | 9.7    |
| 7     | 9250.764  | 91.986  | 12.3   |
| 8     | 7798.846  | 77.549  | 230.0  |
| 9     | 7766.801  | 77.230  | 239.4  |
| 10    | 7734.757  | 76.911  | 243.0  |
| 11    | 7157.194  | 71.168  | 15.3   |
| 12    | 6179.839  | 61.450  | 13.3   |
| 13    | 5986.046  | 59.523  | 13.1   |
| 14    | 4961.387  | 49.334  | 12.2   |
| 15    | 4714.950  | 46.884  | 13.0   |
| 16    | 3555.247  | 35.352  | 9.6    |
| 17    | 2521.432  | 25.072  | 8.5    |
| 18    | 2485.573  | 24.716  | 10.1   |
| 19    | 1431.922  | 14.238  | 13.4   |

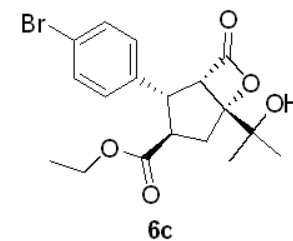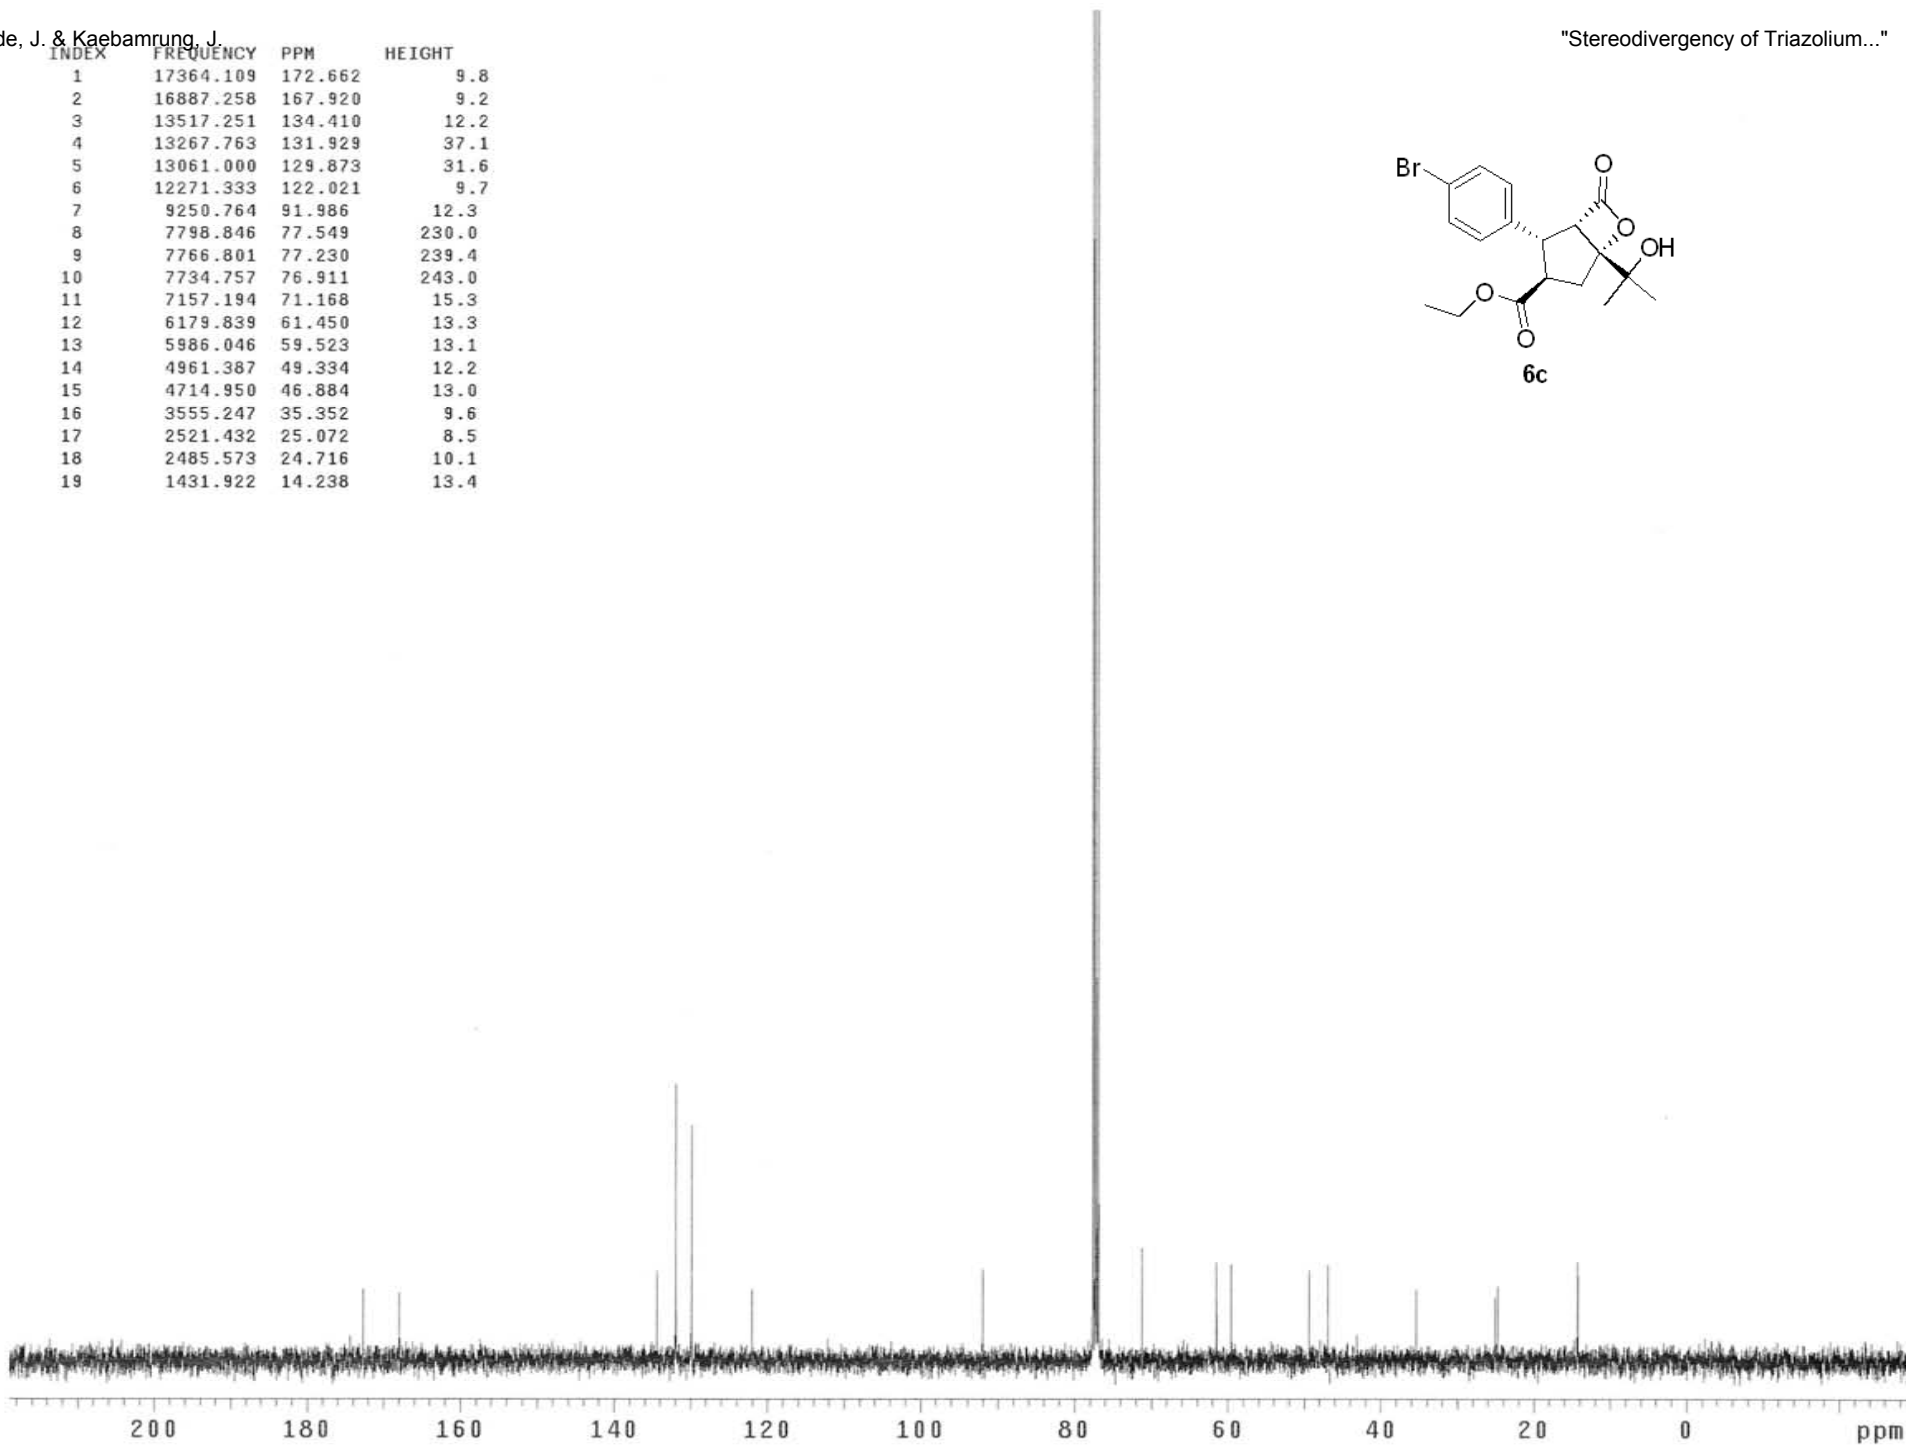

| INDEX | FREQUENCY | PPM   | HEIGHT |
|-------|-----------|-------|--------|
| 1     | 2904.748  | 7.263 | 98.3   |
| 2     | 1557.173  | 3.893 | 58.1   |
| 3     | 634.478   | 1.586 | 71.2   |
| 4     | 583.959   | 1.460 | 150.3  |
| 5     | 556.320   | 1.391 | 151.2  |
| 6     | 392.940   | 0.982 | 57.3   |
| 7     | 385.723   | 0.964 | 114.9  |
| 8     | 378.660   | 0.947 | 58.4   |

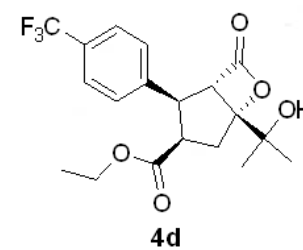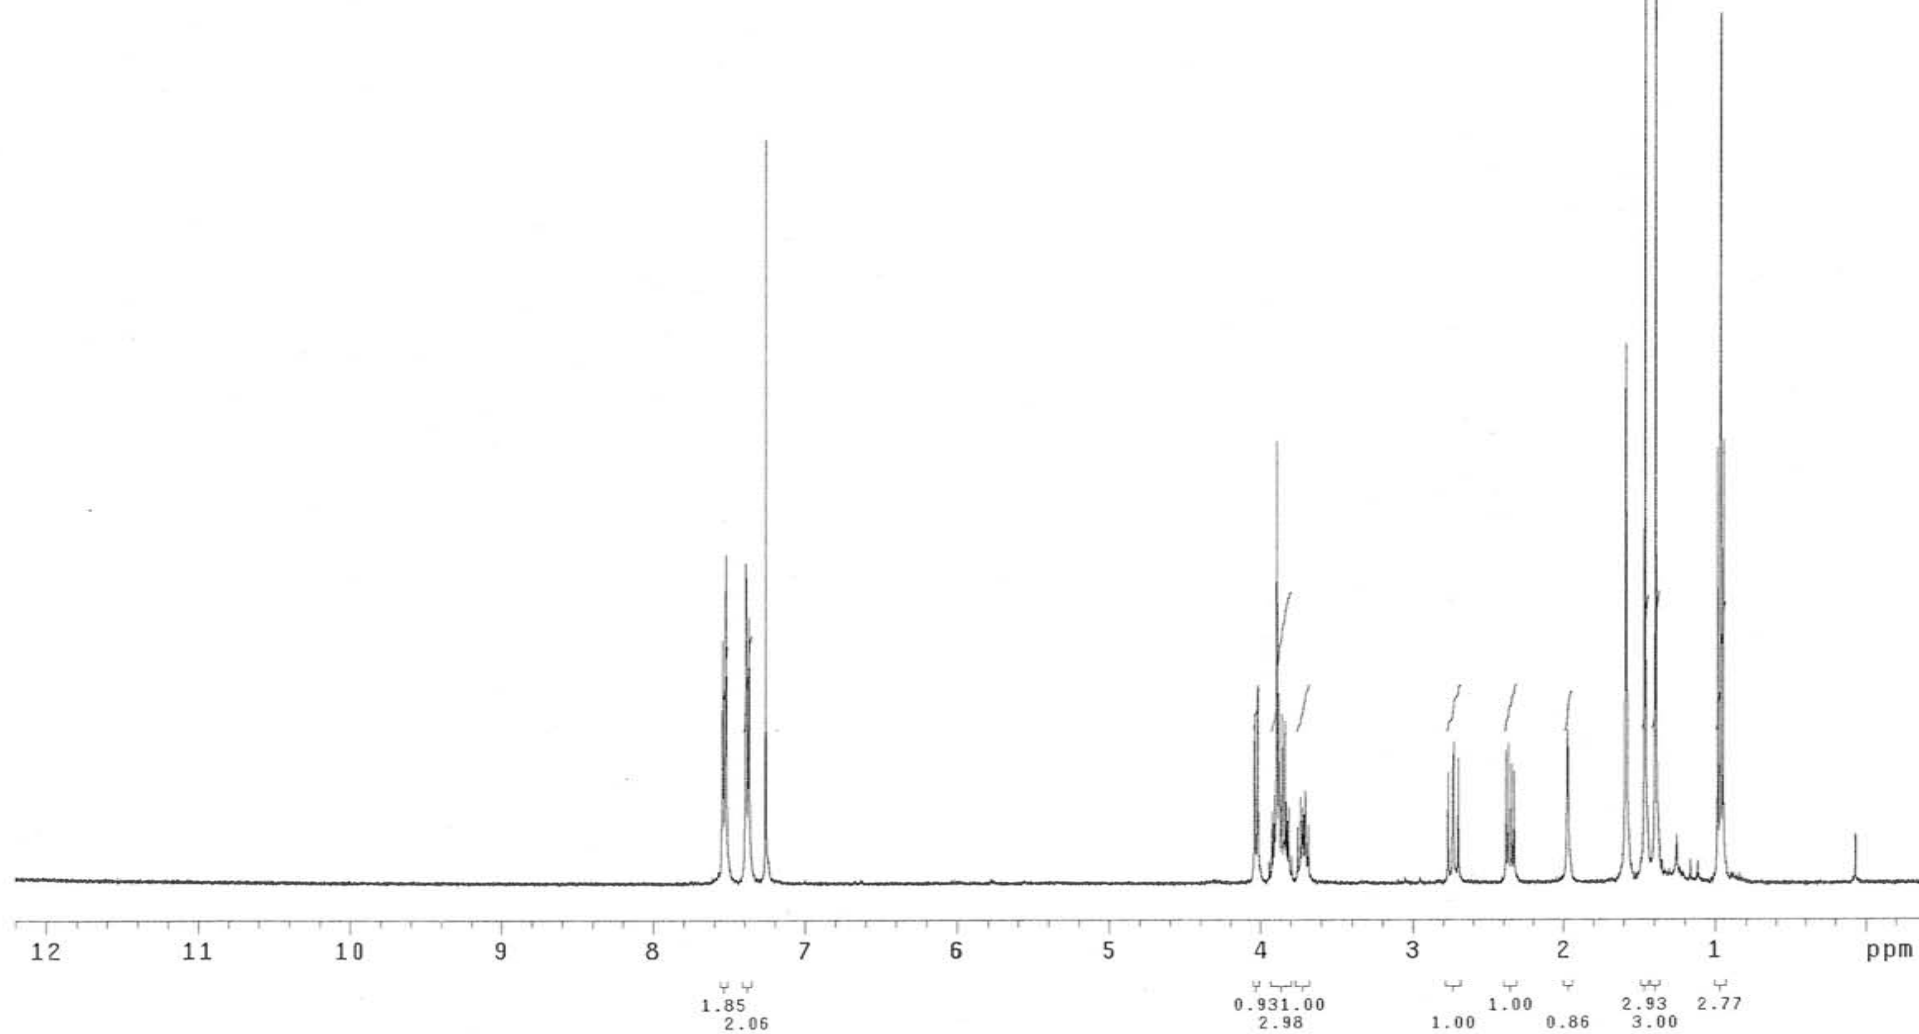

| INDEX | FREQUENCY | PPM     | HEIGHT |
|-------|-----------|---------|--------|
| 1     | 17177.184 | 170.803 | 13.0   |
| 2     | 17024.591 | 169.286 | 13.3   |
| 3     | 14400.762 | 143.195 | 9.9    |
| 4     | 12927.481 | 128.546 | 60.7   |
| 5     | 12645.185 | 125.739 | 25.4   |
| 6     | 12641.370 | 125.701 | 31.6   |
| 7     | 9462.104  | 94.087  | 16.0   |
| 8     | 7798.846  | 77.549  | 160.2  |
| 9     | 7766.801  | 77.230  | 162.0  |
| 10    | 7735.520  | 76.919  | 156.3  |
| 11    | 7196.868  | 71.563  | 22.2   |
| 12    | 6188.231  | 61.533  | 25.1   |
| 13    | 6154.661  | 61.200  | 26.4   |
| 14    | 4855.335  | 48.280  | 24.4   |
| 15    | 4750.809  | 47.240  | 25.7   |
| 16    | 3185.973  | 31.680  | 17.6   |
| 17    | 2583.995  | 25.694  | 23.9   |
| 18    | 2579.417  | 25.649  | 19.8   |
| 19    | 1409.796  | 14.018  | 29.4   |

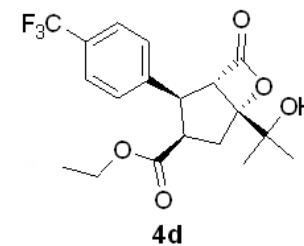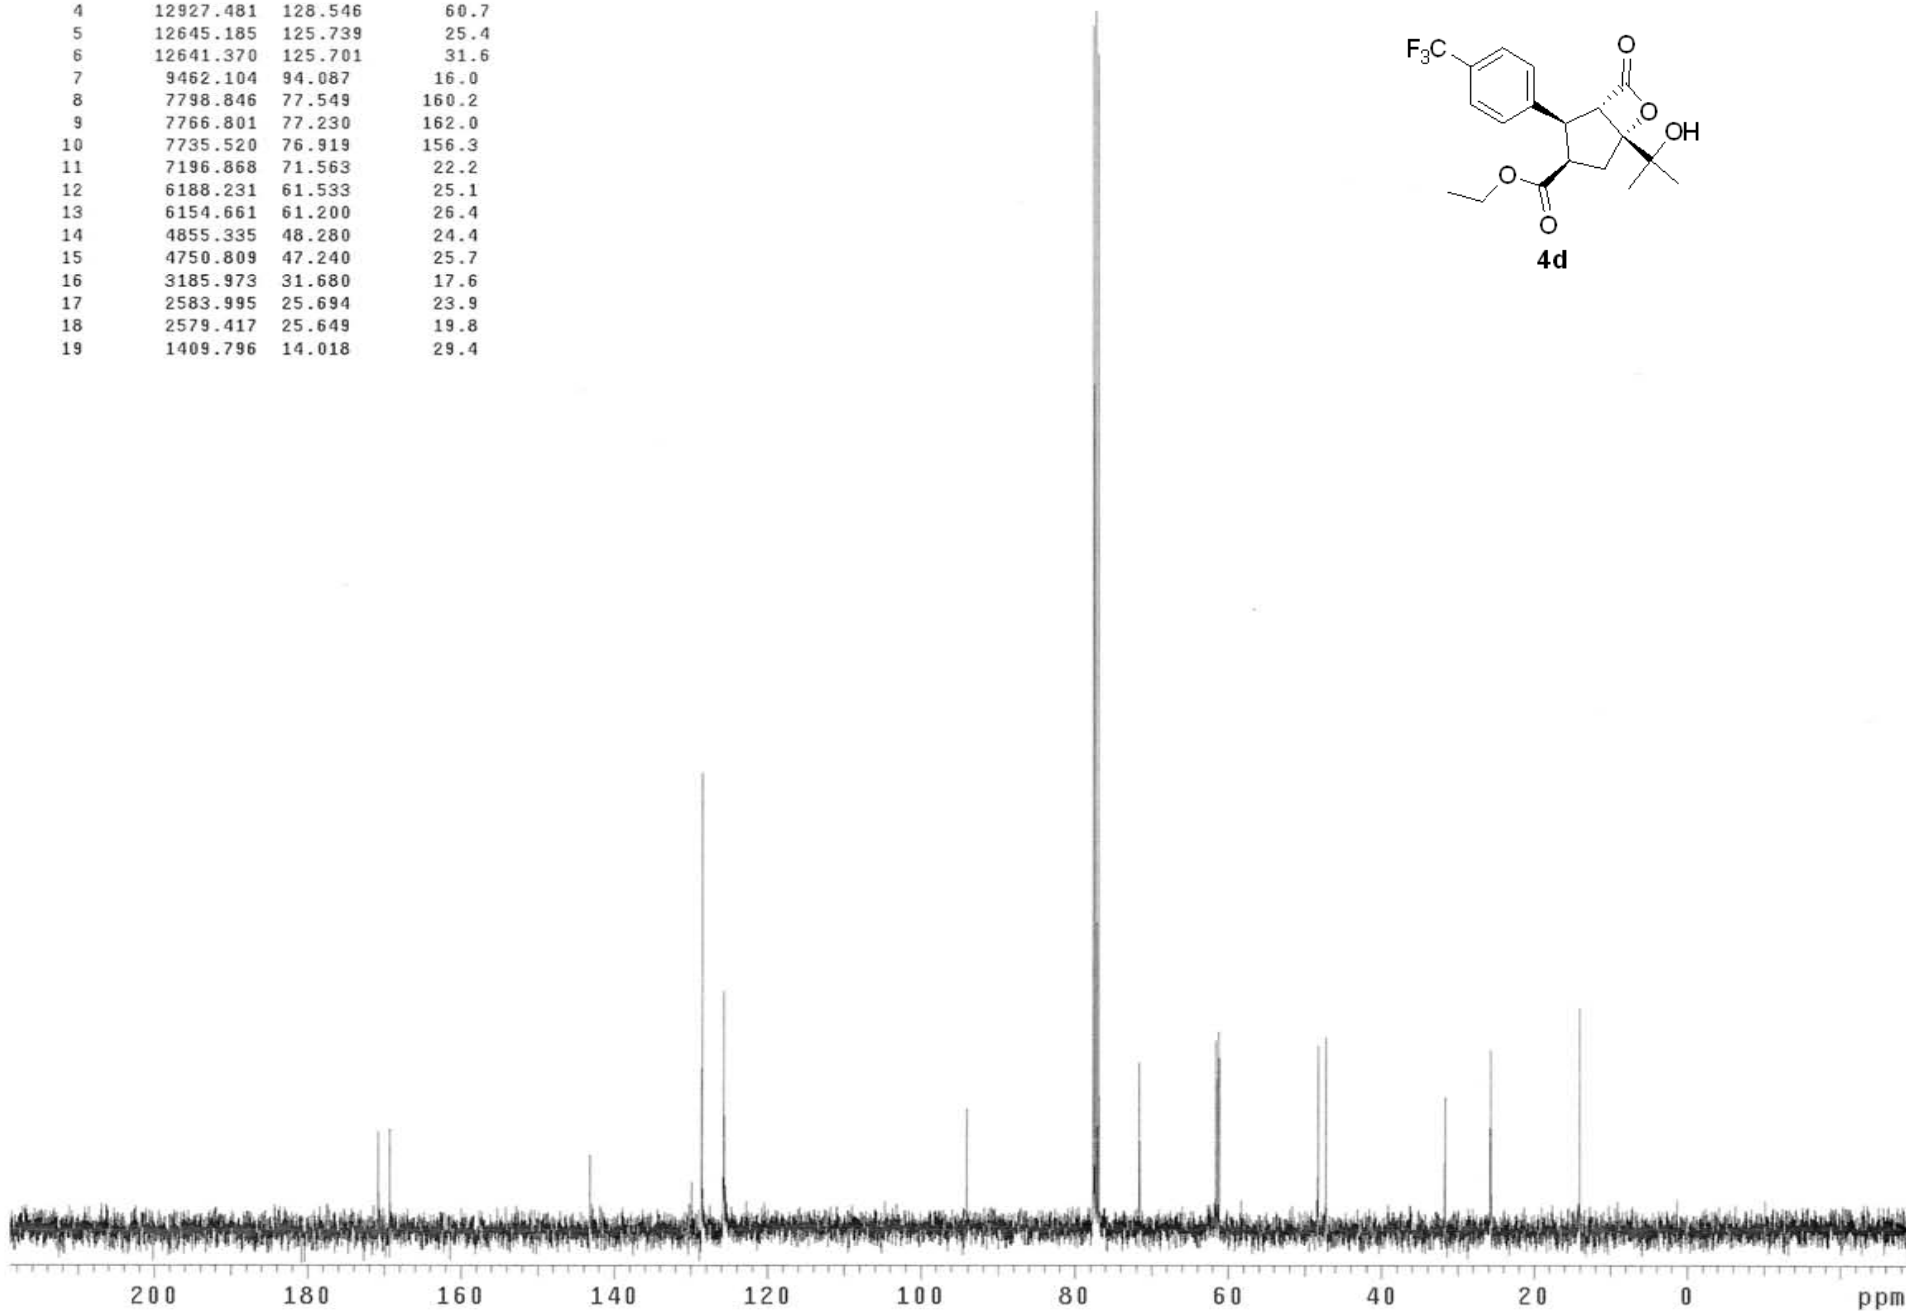

| INDEX | FREQUENCY | PPM   | HEIGHT |
|-------|-----------|-------|--------|
| 1     | 2907.627  | 7.270 | 100.7  |
| 2     | 593.902   | 1.485 | 134.4  |
| 3     | 587.913   | 1.470 | 151.2  |
| 4     | 484.879   | 1.212 | 75.4   |
| 5     | 477.816   | 1.195 | 149.6  |
| 6     | 470.599   | 1.177 | 74.0   |

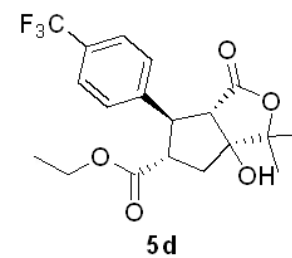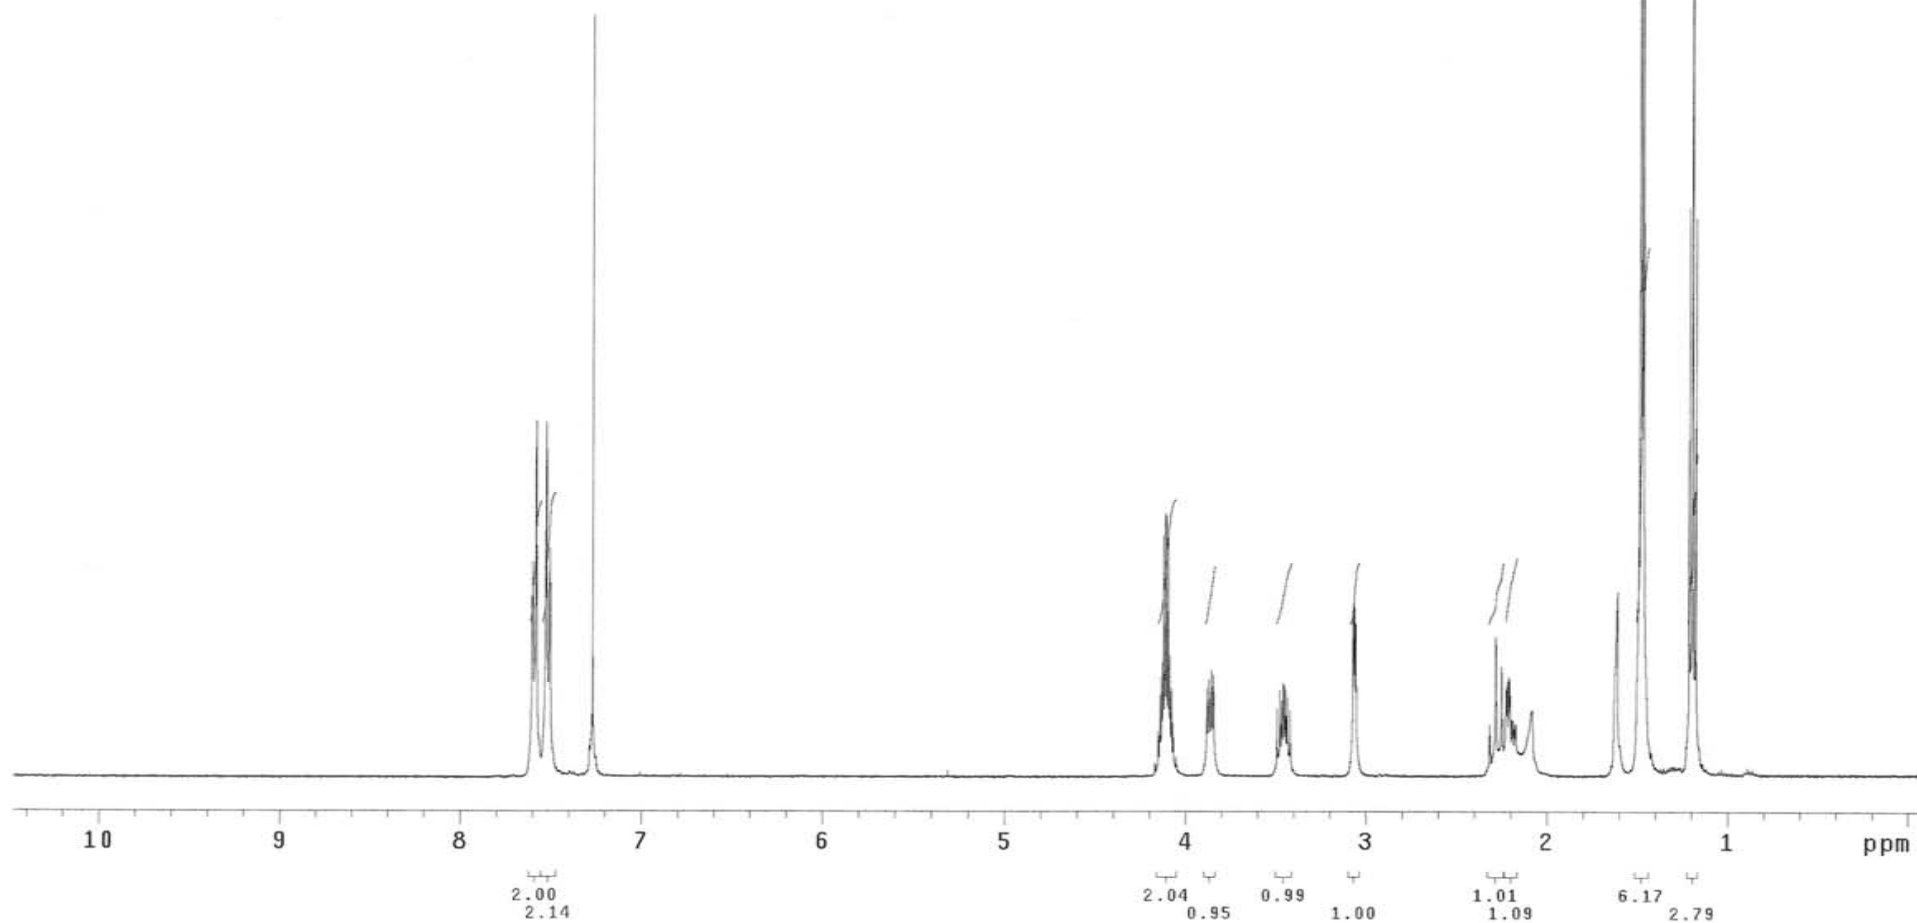

| INDEX | FREQUENCY | PPM     | HEIGHT |
|-------|-----------|---------|--------|
| 1     | 12907.644 | 128.349 | 56.0   |
| 2     | 12668.837 | 125.974 | 23.3   |
| 3     | 12665.785 | 125.944 | 22.2   |
| 4     | 8868.519  | 88.185  | 23.8   |
| 5     | 7798.846  | 77.549  | 224.2  |
| 6     | 7766.801  | 77.230  | 231.7  |
| 7     | 7734.757  | 76.911  | 229.3  |
| 8     | 6172.972  | 61.382  | 24.1   |
| 9     | 5927.298  | 58.939  | 23.1   |
| 10    | 2168.944  | 21.567  | 20.1   |
| 11    | 1438.788  | 14.307  | 28.6   |

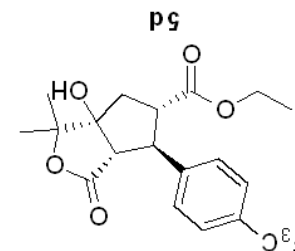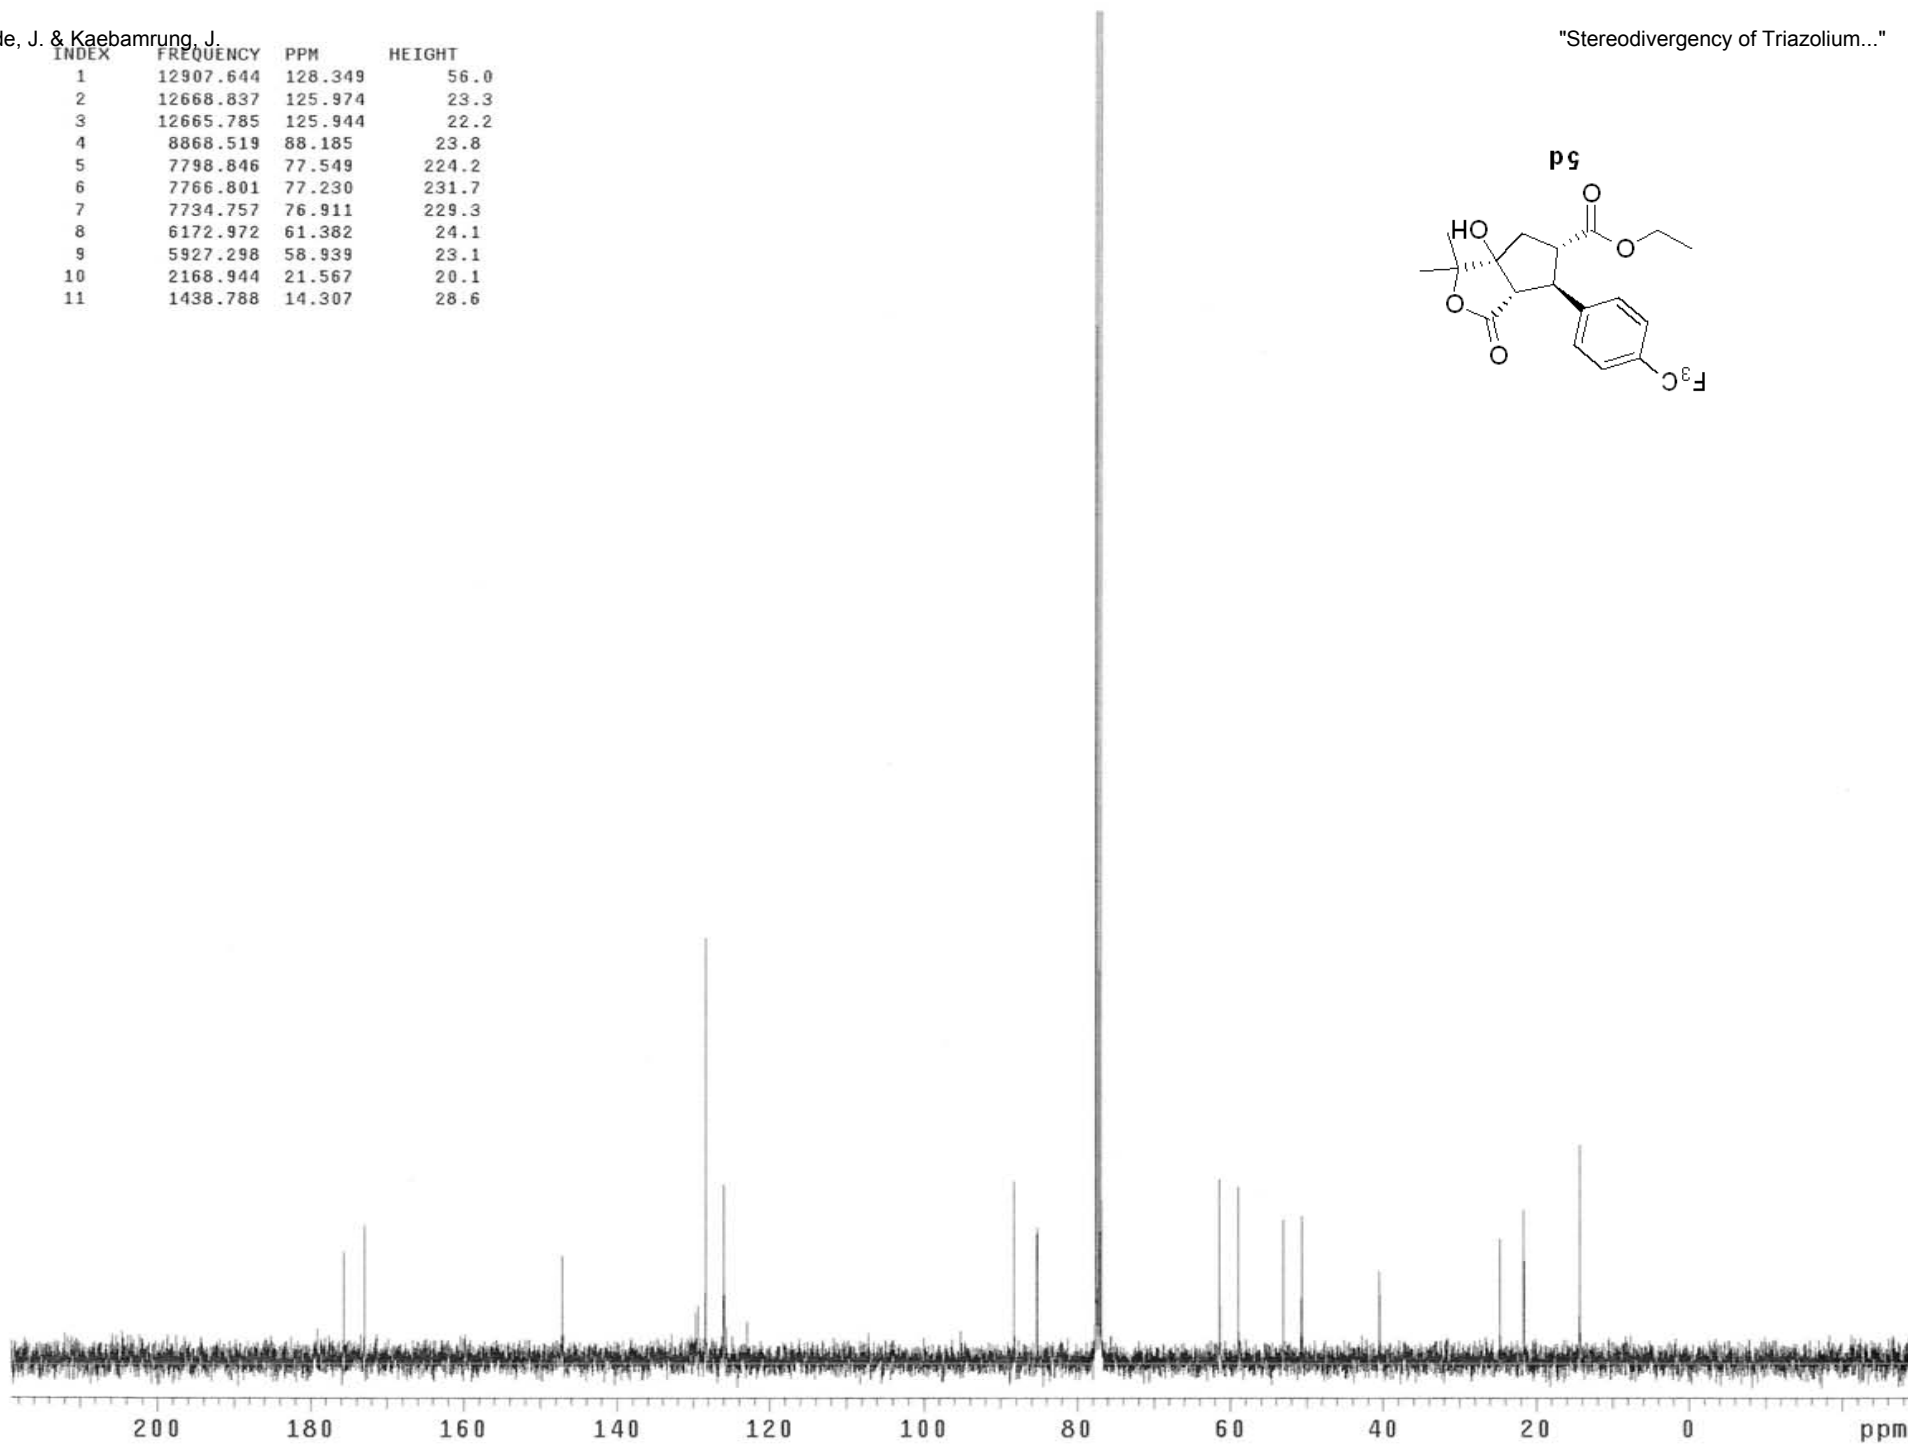

| INDEX | FREQUENCY | PPM   | HEIGHT |
|-------|-----------|-------|--------|
| 1     | 1623.623  | 4.060 | 49.6   |
| 2     | 1616.252  | 4.041 | 49.9   |
| 3     | 553.057   | 1.383 | 135.9  |
| 4     | 545.686   | 1.364 | 151.2  |
| 5     | 451.866   | 1.130 | 51.9   |
| 6     | 444.802   | 1.112 | 107.7  |
| 7     | 437.585   | 1.094 | 56.1   |

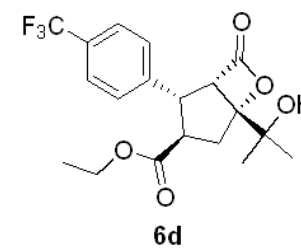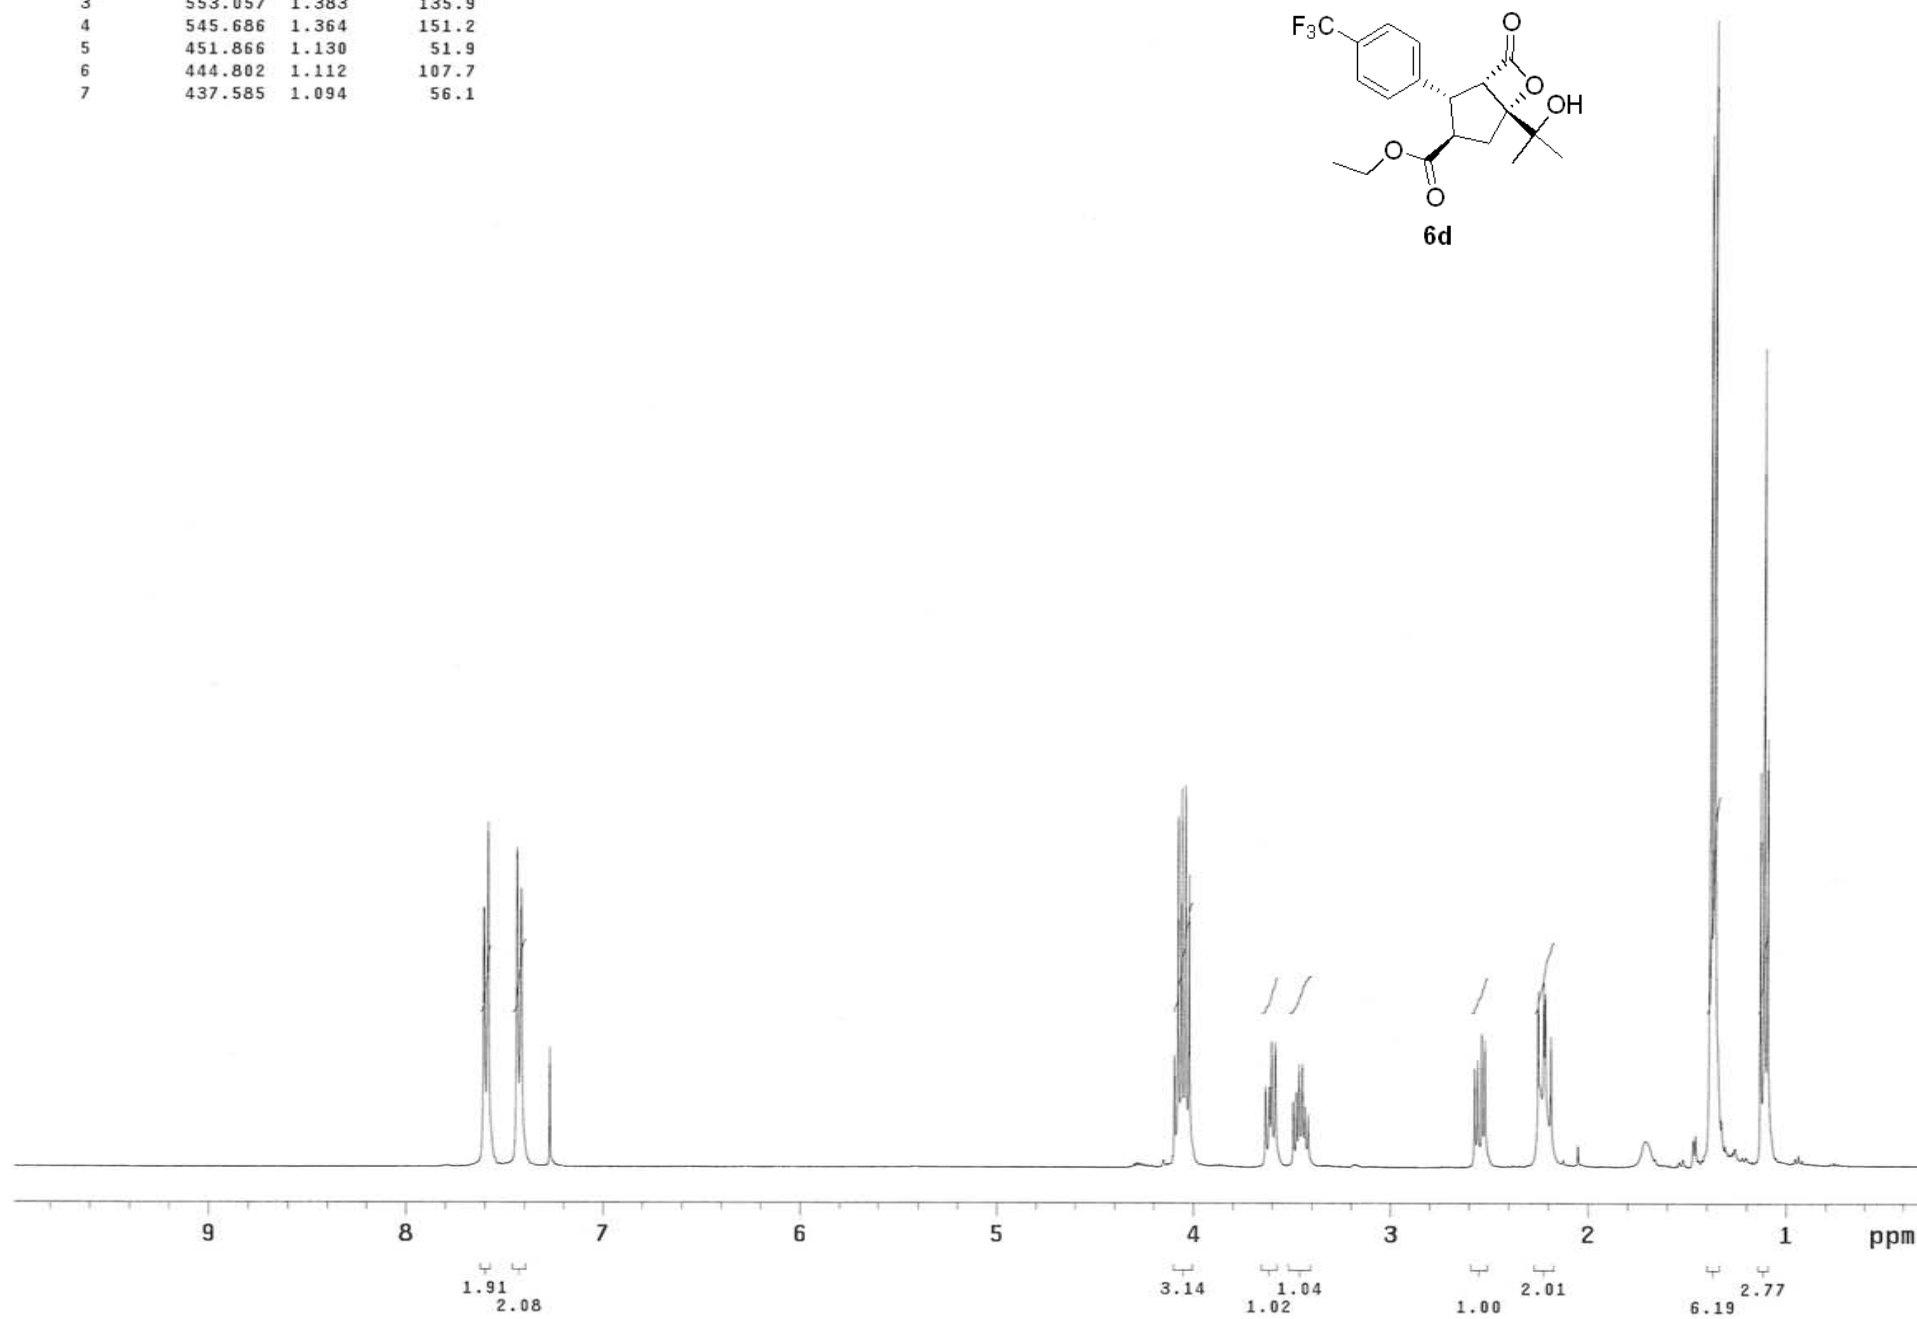

| INDEX | FREQUENCY | PPM     | HEIGHT |
|-------|-----------|---------|--------|
| 1     | 17353.428 | 172.556 | 14.5   |
| 2     | 12932.822 | 128.599 | 45.8   |
| 3     | 12647.474 | 125.761 | 18.1   |
| 4     | 12643.659 | 125.724 | 18.9   |
| 5     | 9256.867  | 92.047  | 16.2   |
| 6     | 7798.846  | 77.549  | 79.5   |
| 7     | 7766.801  | 77.230  | 81.0   |
| 8     | 7734.757  | 76.911  | 78.3   |
| 9     | 7152.616  | 71.123  | 18.4   |
| 10    | 6185.942  | 61.511  | 18.4   |
| 11    | 5980.705  | 59.470  | 15.4   |
| 12    | 4972.069  | 49.440  | 16.6   |
| 13    | 4706.558  | 46.800  | 17.0   |
| 14    | 2487.862  | 24.738  | 14.8   |
| 15    | 1424.292  | 14.163  | 19.3   |

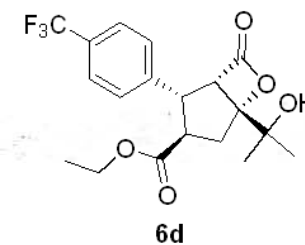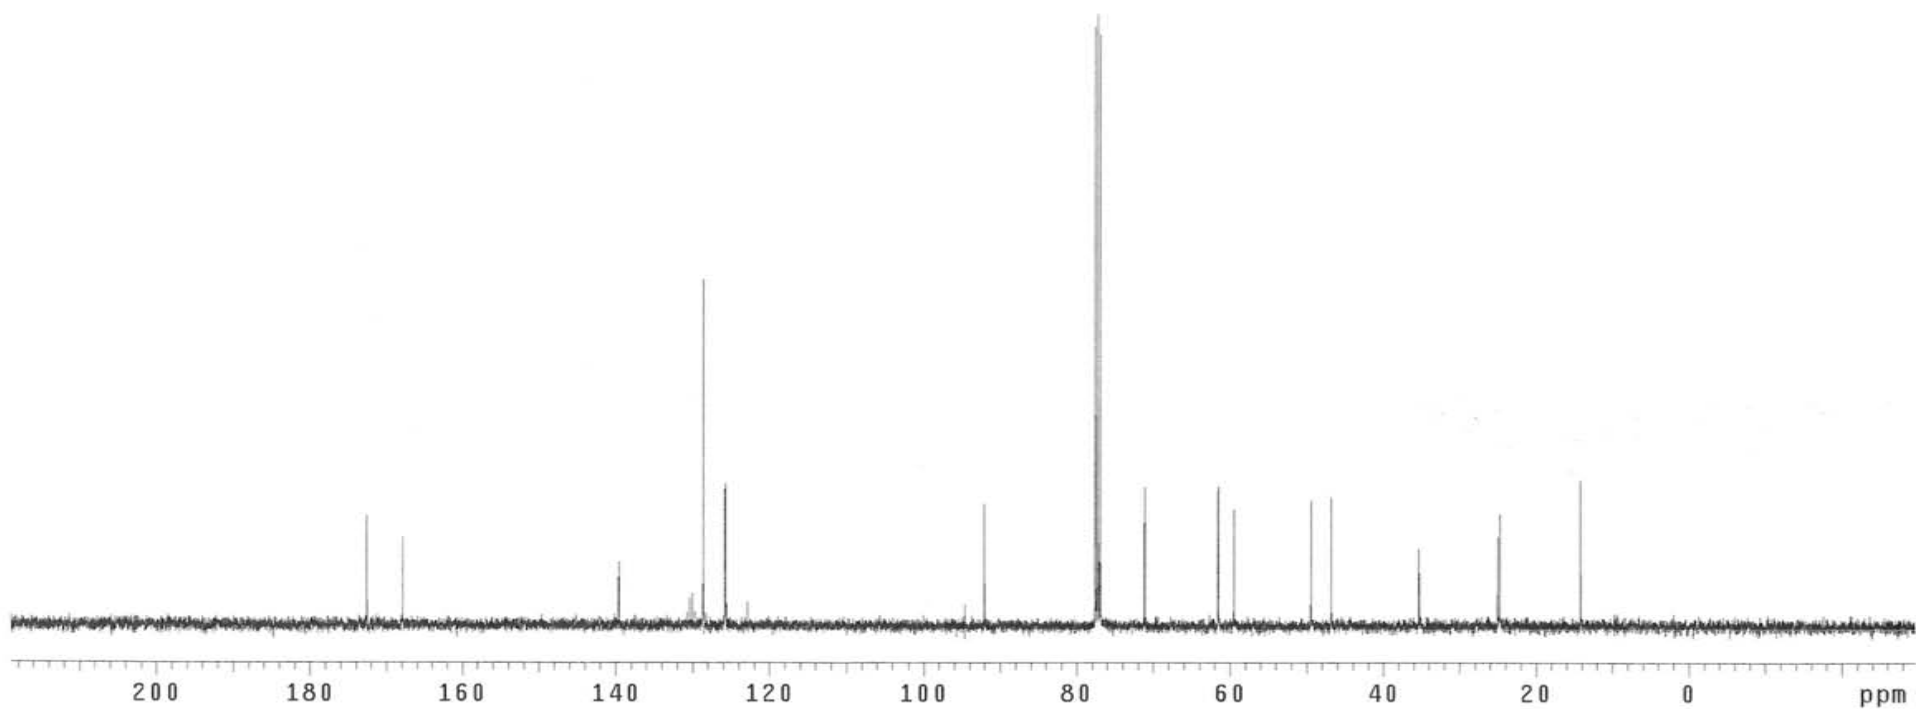



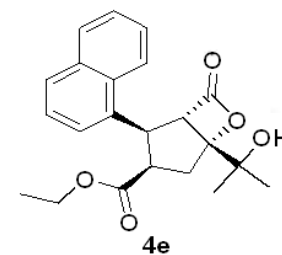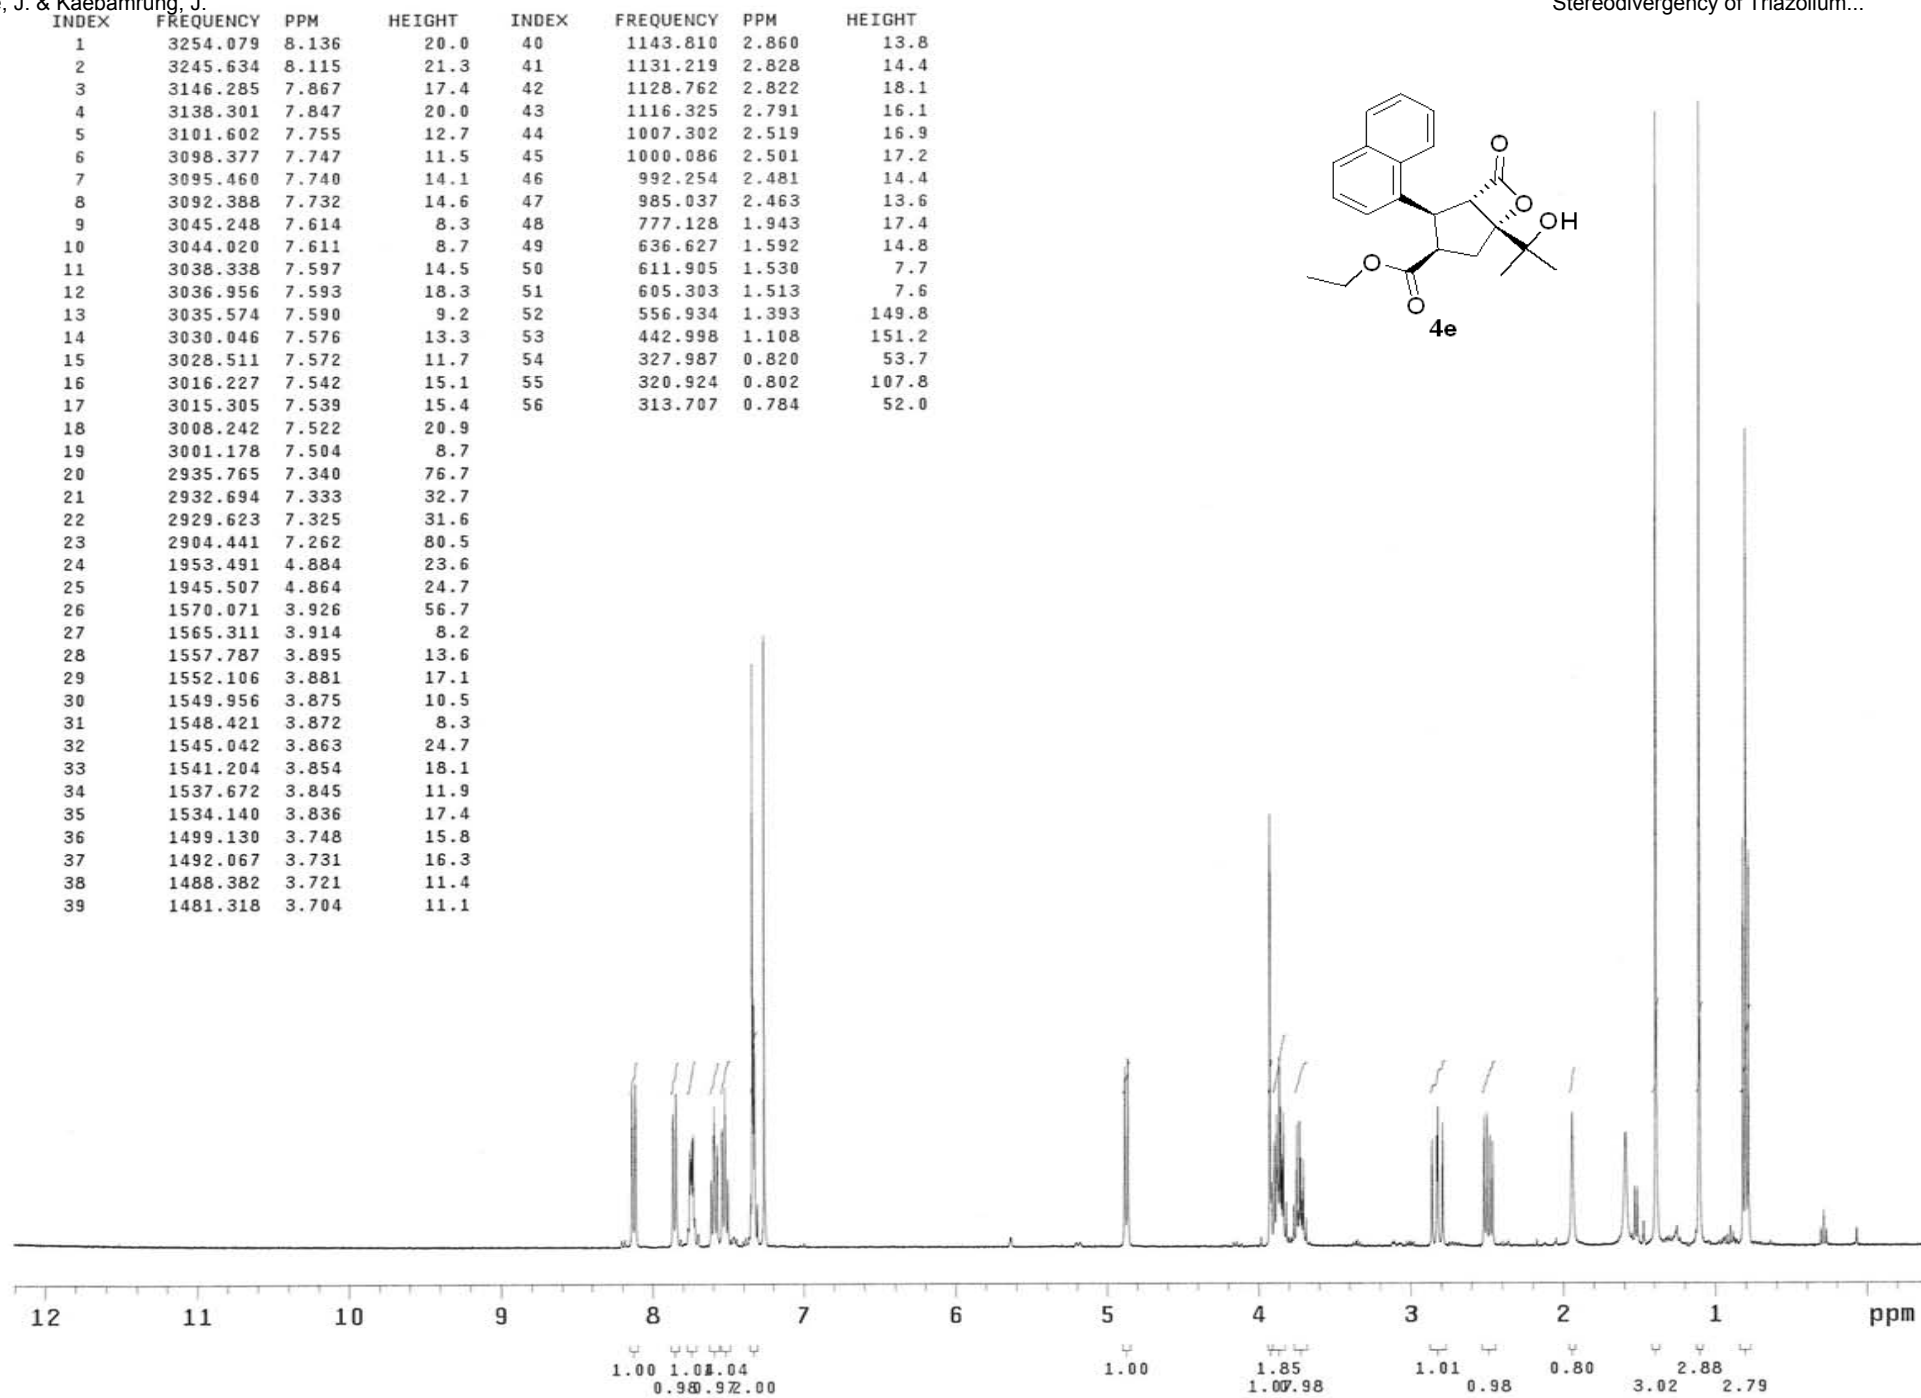

| INDEX | FREQUENCY | PPM     | HEIGHT |
|-------|-----------|---------|--------|
| 1     | 17279.421 | 171.820 | 16.8   |
| 2     | 17092.495 | 169.961 | 16.4   |
| 3     | 13538.614 | 134.623 | 17.3   |
| 4     | 13506.570 | 134.304 | 17.5   |
| 5     | 13190.703 | 131.163 | 16.3   |
| 6     | 13006.066 | 129.327 | 33.1   |
| 7     | 12913.748 | 128.409 | 30.0   |
| 8     | 12751.237 | 126.793 | 33.6   |
| 9     | 12682.570 | 126.110 | 30.6   |
| 10    | 12571.941 | 125.010 | 30.0   |
| 11    | 12397.985 | 123.281 | 27.1   |
| 12    | 12384.252 | 123.144 | 27.5   |
| 13    | 9513.986  | 94.603  | -9.8   |
| 14    | 9508.645  | 94.550  | 20.4   |
| 15    | 7798.846  | 77.549  | 100.1  |
| 16    | 7766.801  | 77.230  | 100.1  |
| 17    | 7734.757  | 76.911  | 96.4   |
| 18    | 7158.720  | 71.183  | 21.0   |
| 19    | 6273.683  | 62.383  | 26.2   |
| 20    | 6142.454  | 61.078  | 27.7   |
| 21    | 4778.276  | 47.513  | 28.7   |
| 22    | 4208.343  | 41.846  | 24.2   |
| 23    | 3291.262  | 32.727  | 18.0   |
| 24    | 2551.951  | 25.376  | 19.7   |
| 25    | 2519.907  | 25.057  | 20.2   |
| 26    | 1393.011  | 13.852  | 30.1   |

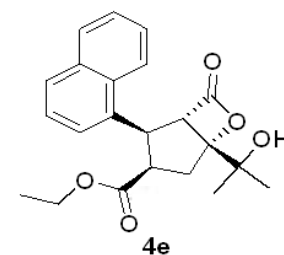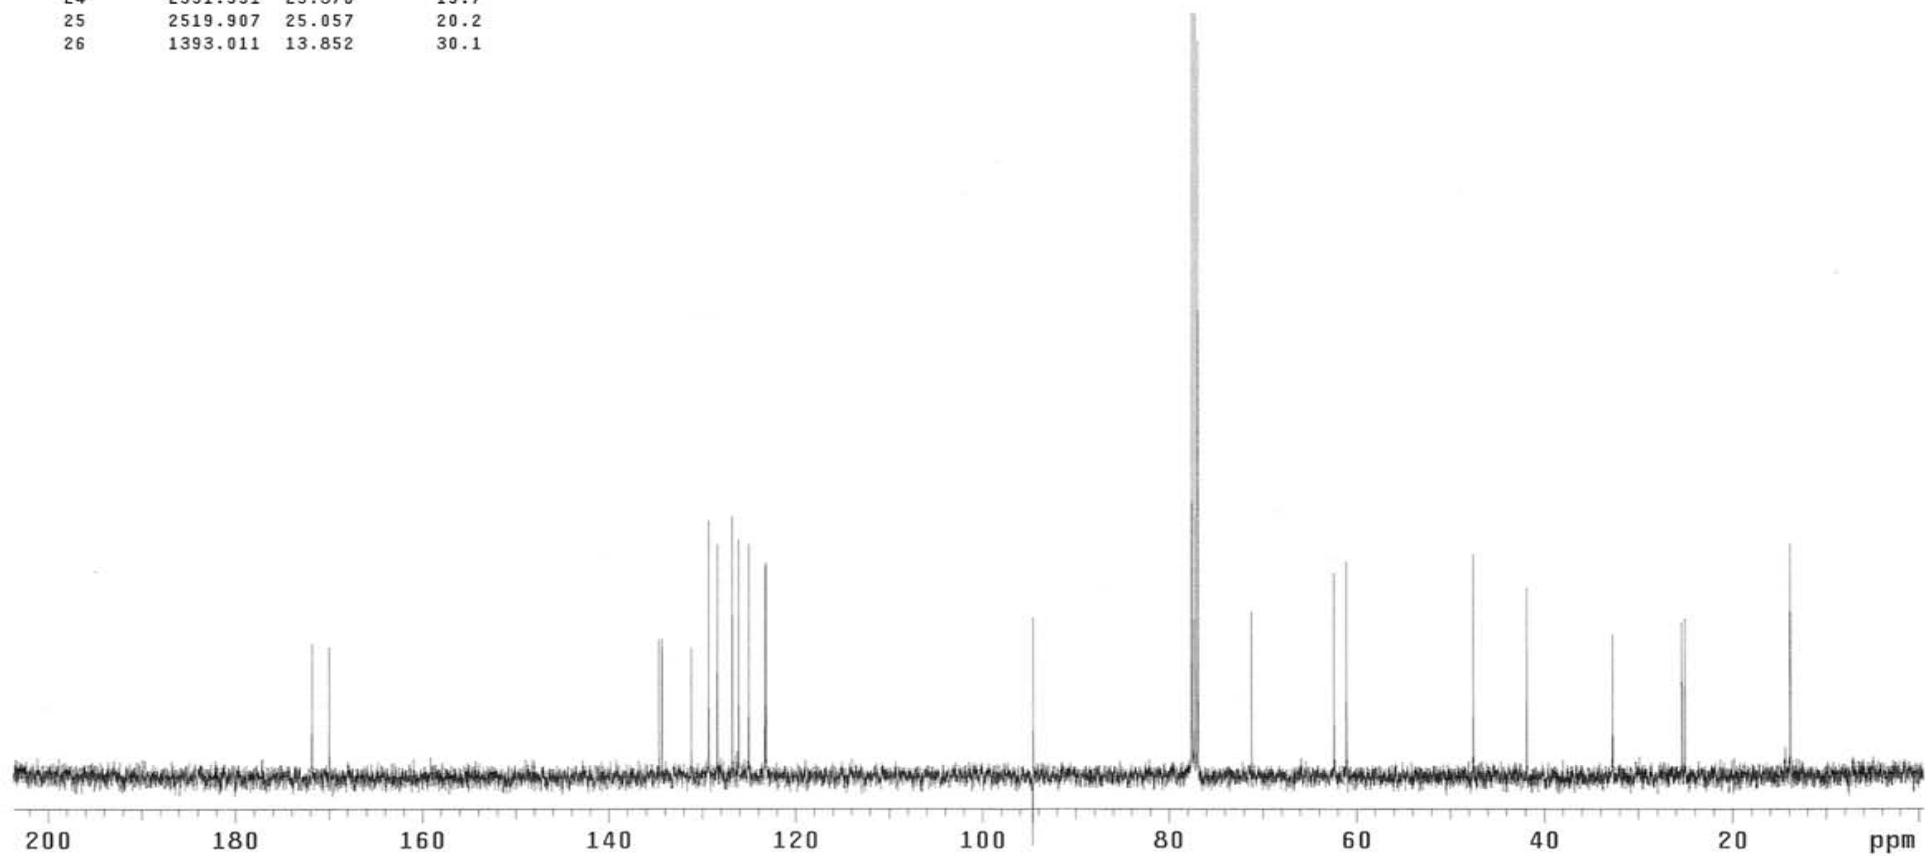

| INDEX | FREQUENCY | PPM   | HEIGHT |
|-------|-----------|-------|--------|
| 1     | 2904.901  | 7.263 | 122.4  |
| 2     | 1616.444  | 4.042 | 76.8   |
| 3     | 1609.381  | 4.024 | 82.1   |
| 4     | 1583.738  | 3.960 | 50.9   |
| 5     | 635.399   | 1.589 | 76.1   |
| 6     | 563.844   | 1.410 | 151.2  |
| 7     | 533.901   | 1.335 | 142.6  |
| 8     | 457.893   | 1.145 | 61.8   |
| 9     | 450.829   | 1.127 | 128.3  |
| 10    | 443.612   | 1.109 | 60.2   |

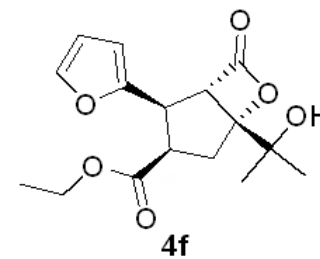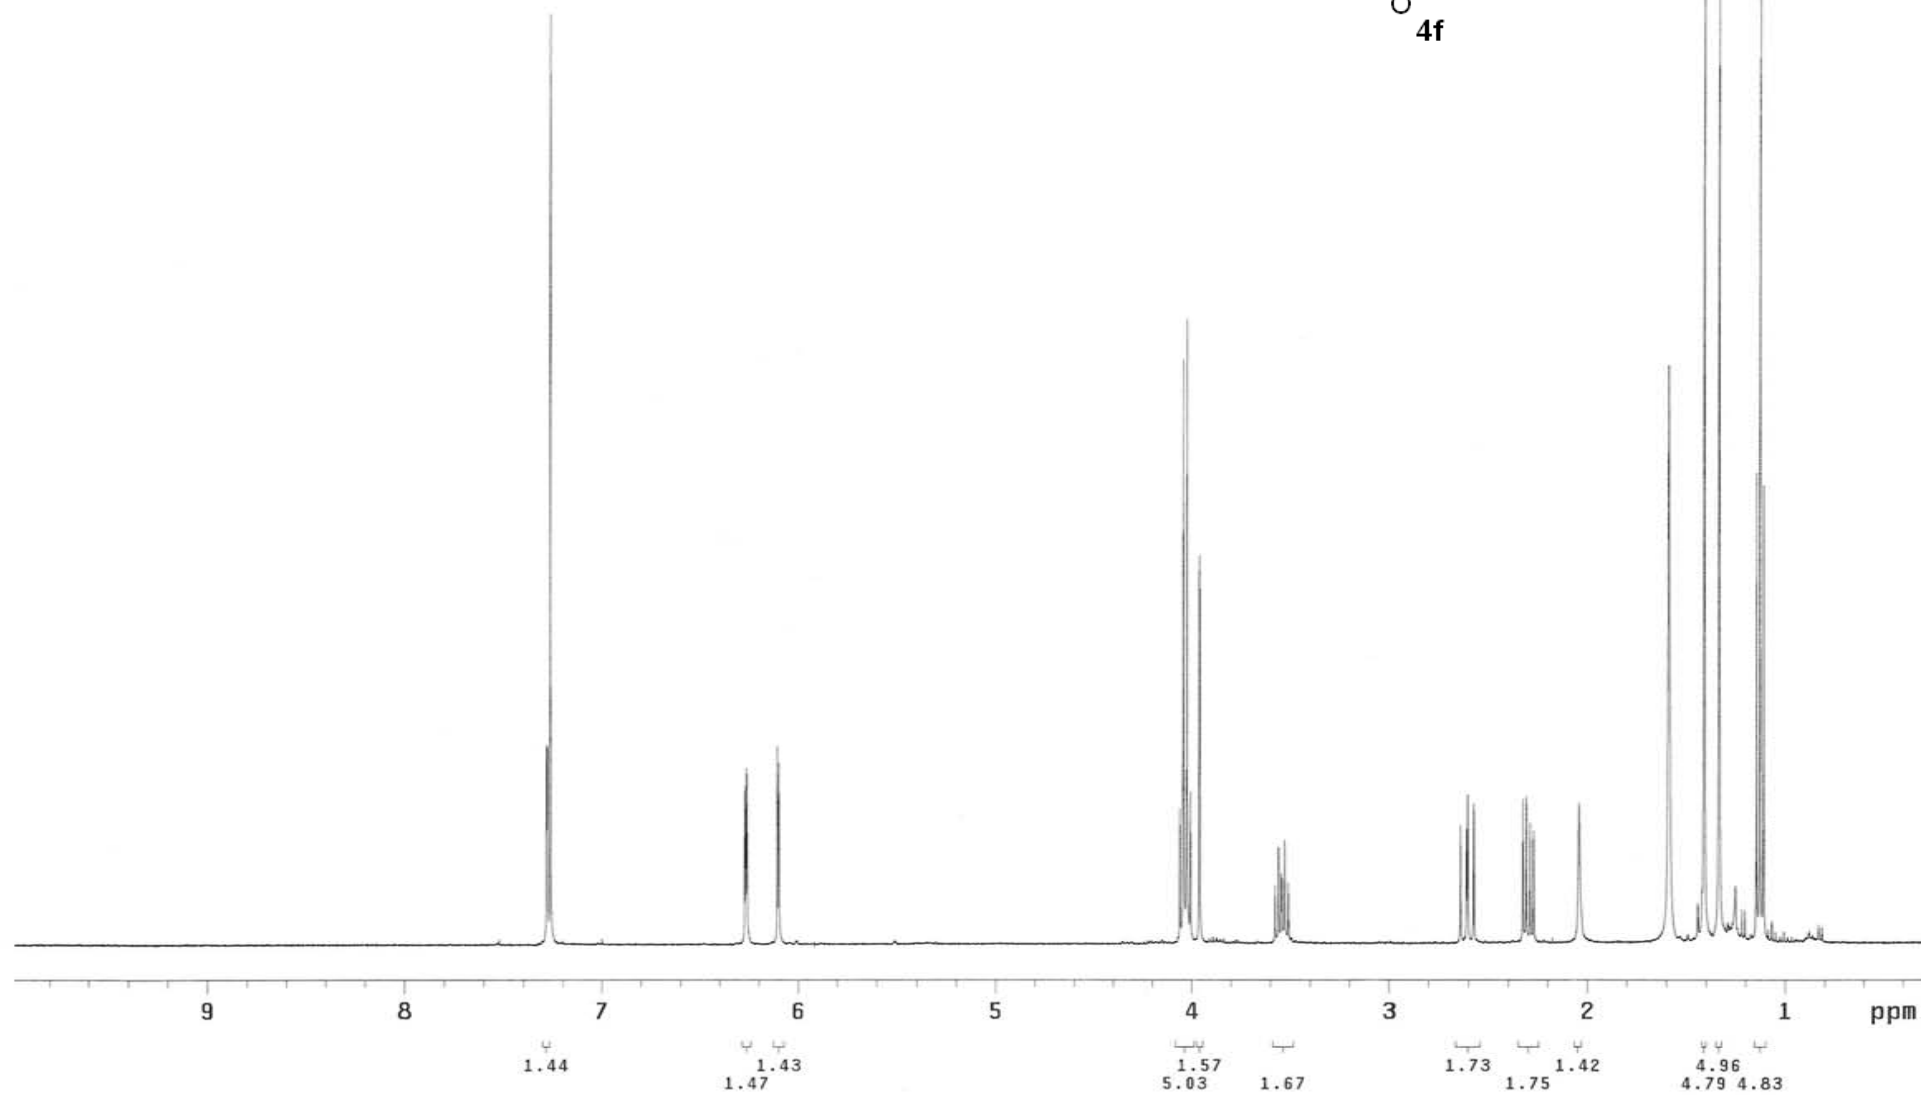

| INDEX | FREQUENCY | PPM     | HEIGHT |
|-------|-----------|---------|--------|
| 1     | 17186.339 | 170.894 | 19.1   |
| 2     | 17009.332 | 169.134 | 15.9   |
| 3     | 15265.199 | 151.791 | 18.4   |
| 4     | 14303.866 | 142.232 | 36.2   |
| 5     | 11116.208 | 110.535 | 35.5   |
| 6     | 10815.600 | 107.546 | 35.7   |
| 7     | 9519.327  | 94.656  | 20.6   |
| 8     | 7798.846  | 77.549  | 79.2   |
| 9     | 7766.801  | 77.230  | 81.0   |
| 10    | 7734.757  | 76.911  | 77.5   |
| 11    | 7190.764  | 71.502  | 15.1   |
| 12    | 6153.135  | 61.184  | 32.2   |
| 13    | 5990.624  | 59.568  | 27.3   |
| 14    | 4757.676  | 47.308  | 32.6   |
| 15    | 4114.499  | 40.913  | 33.4   |
| 16    | 3218.017  | 31.999  | 21.0   |
| 17    | 2568.736  | 25.542  | 15.8   |
| 18    | 2480.233  | 24.662  | 28.5   |
| 19    | 1432.685  | 14.246  | 32.9   |

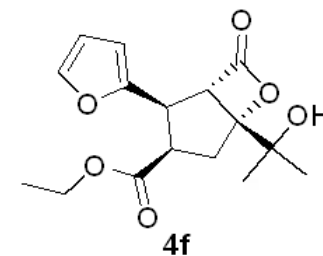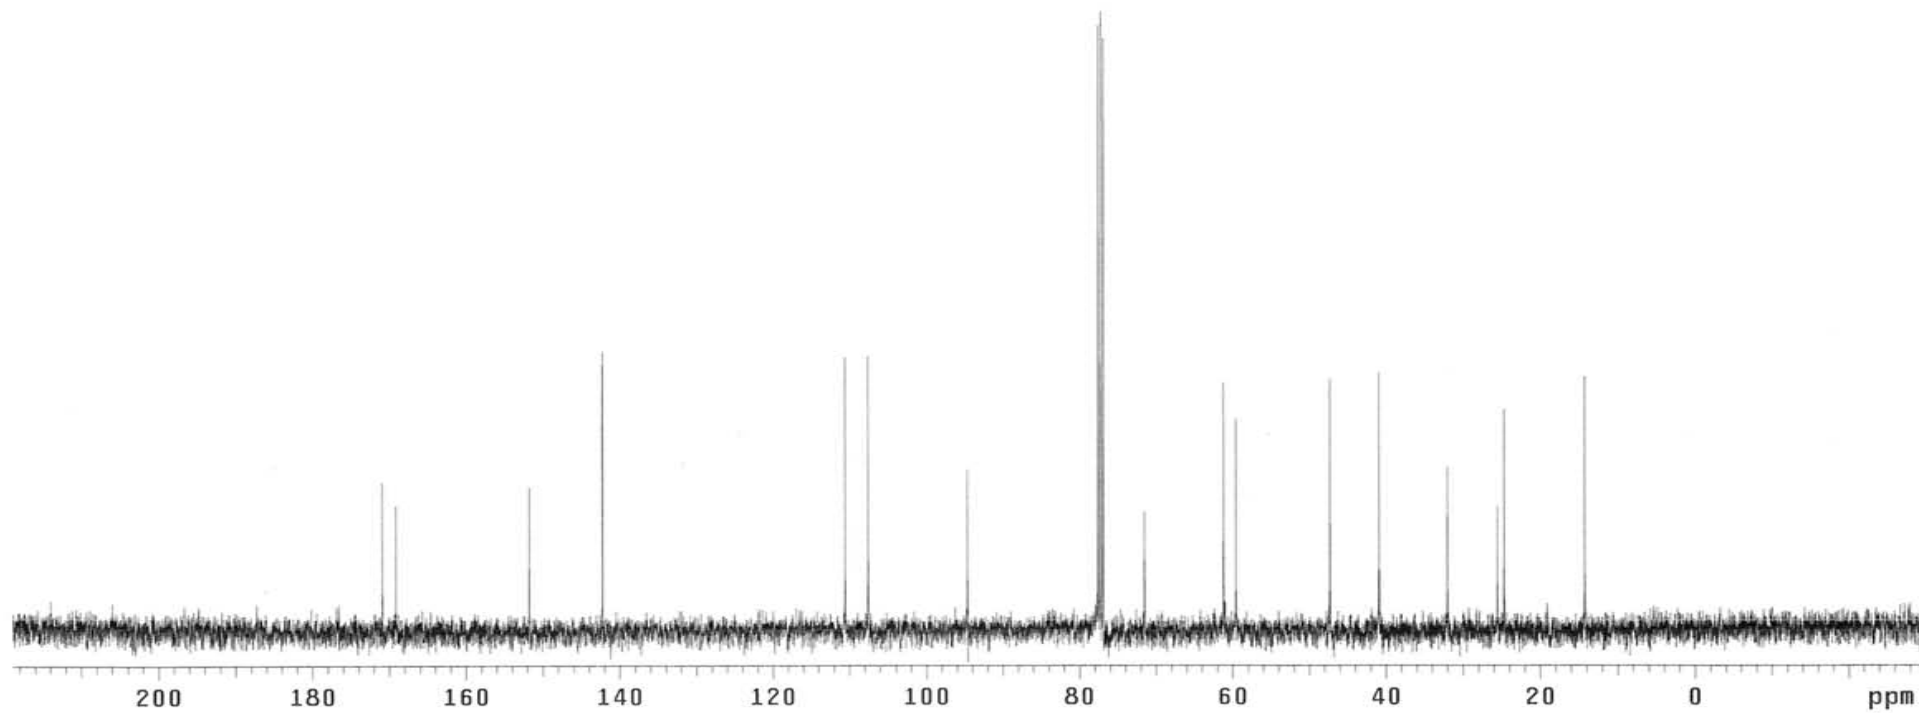

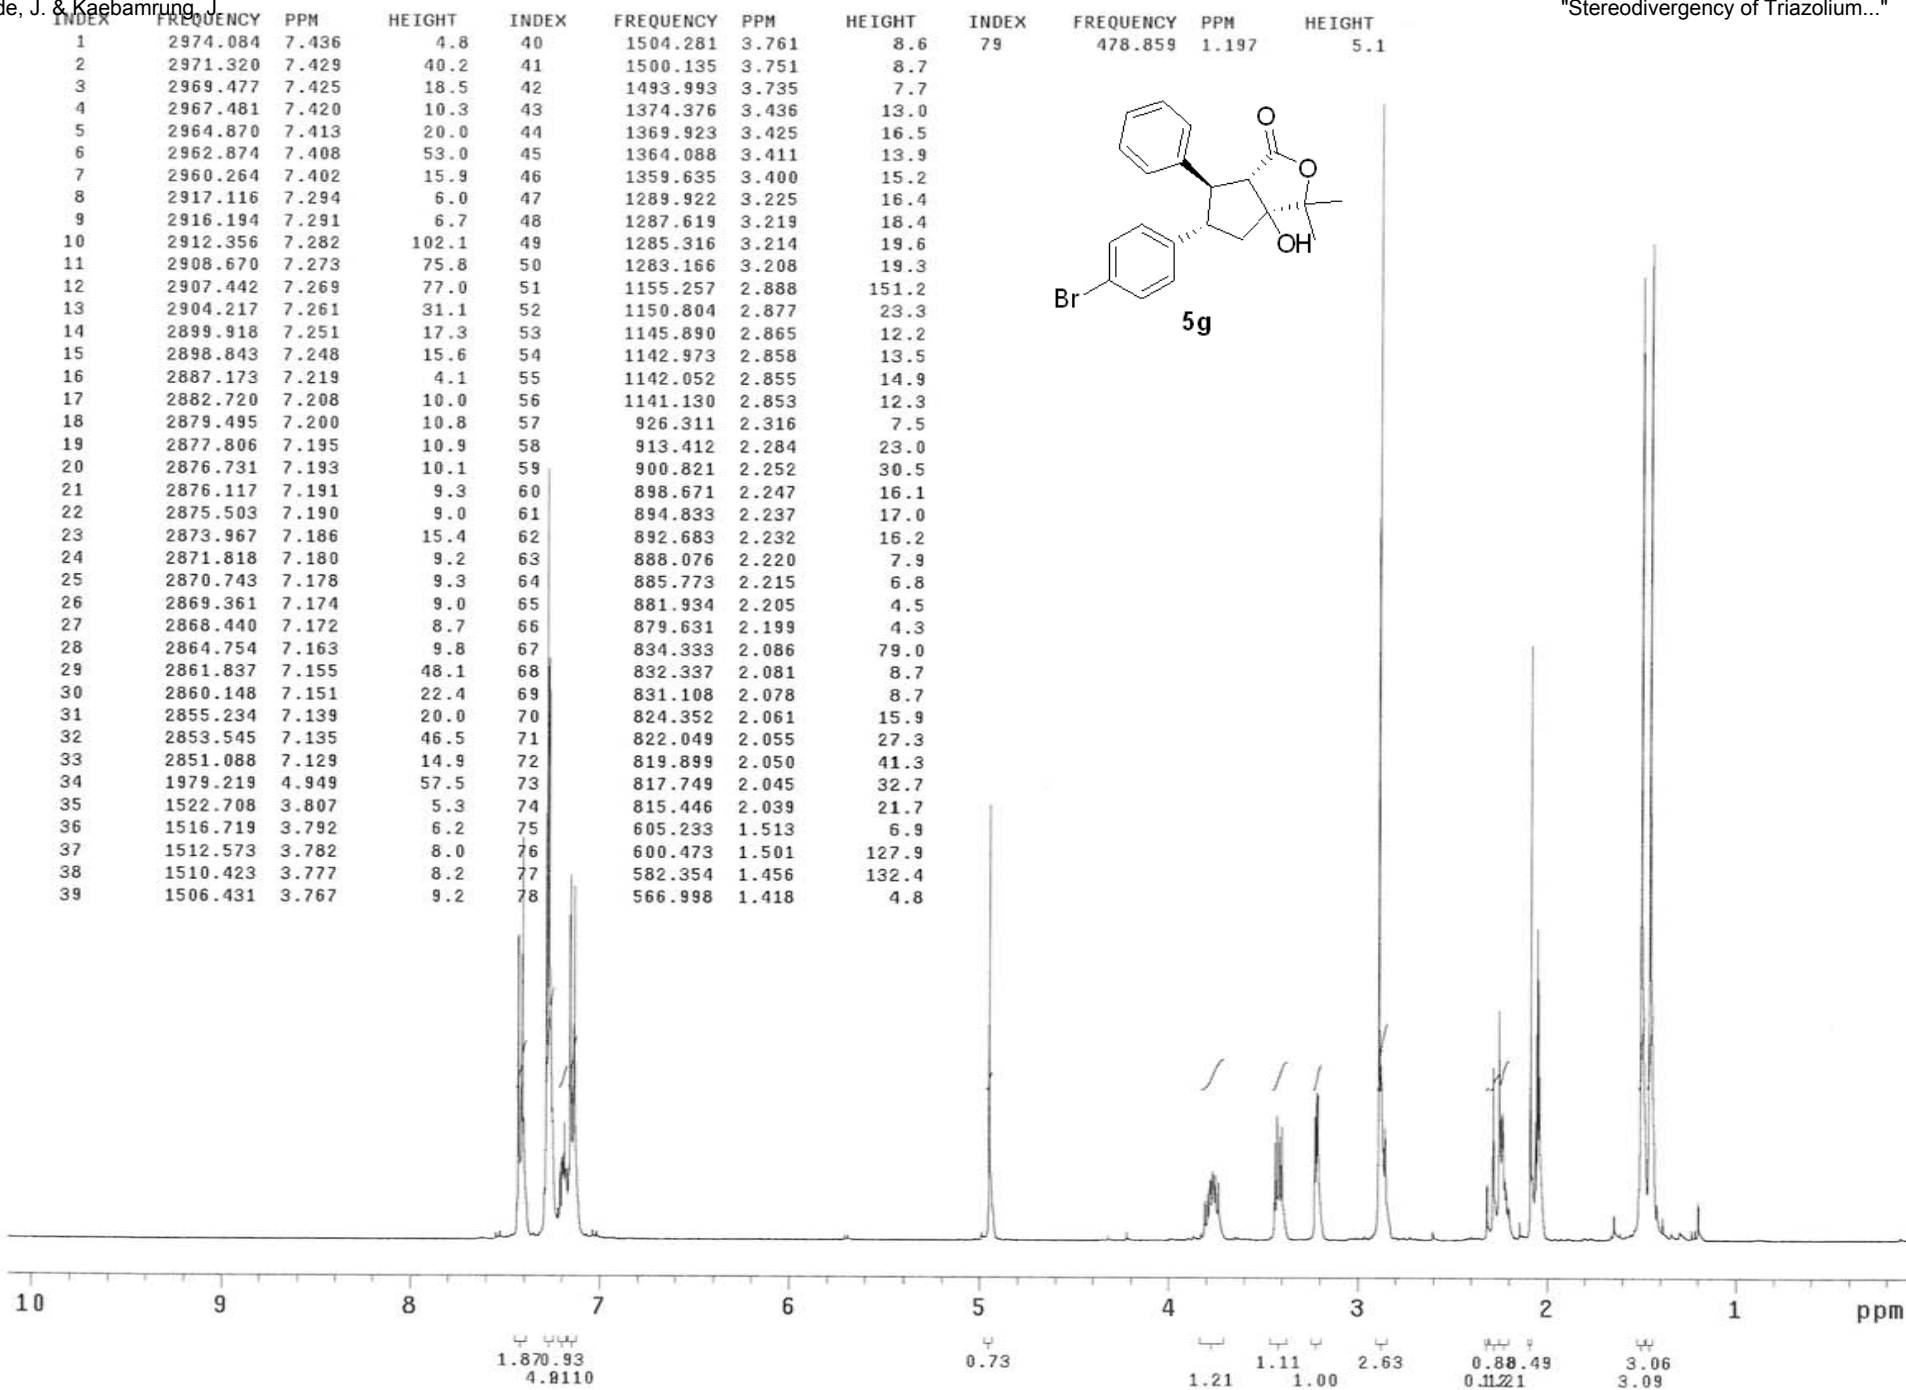

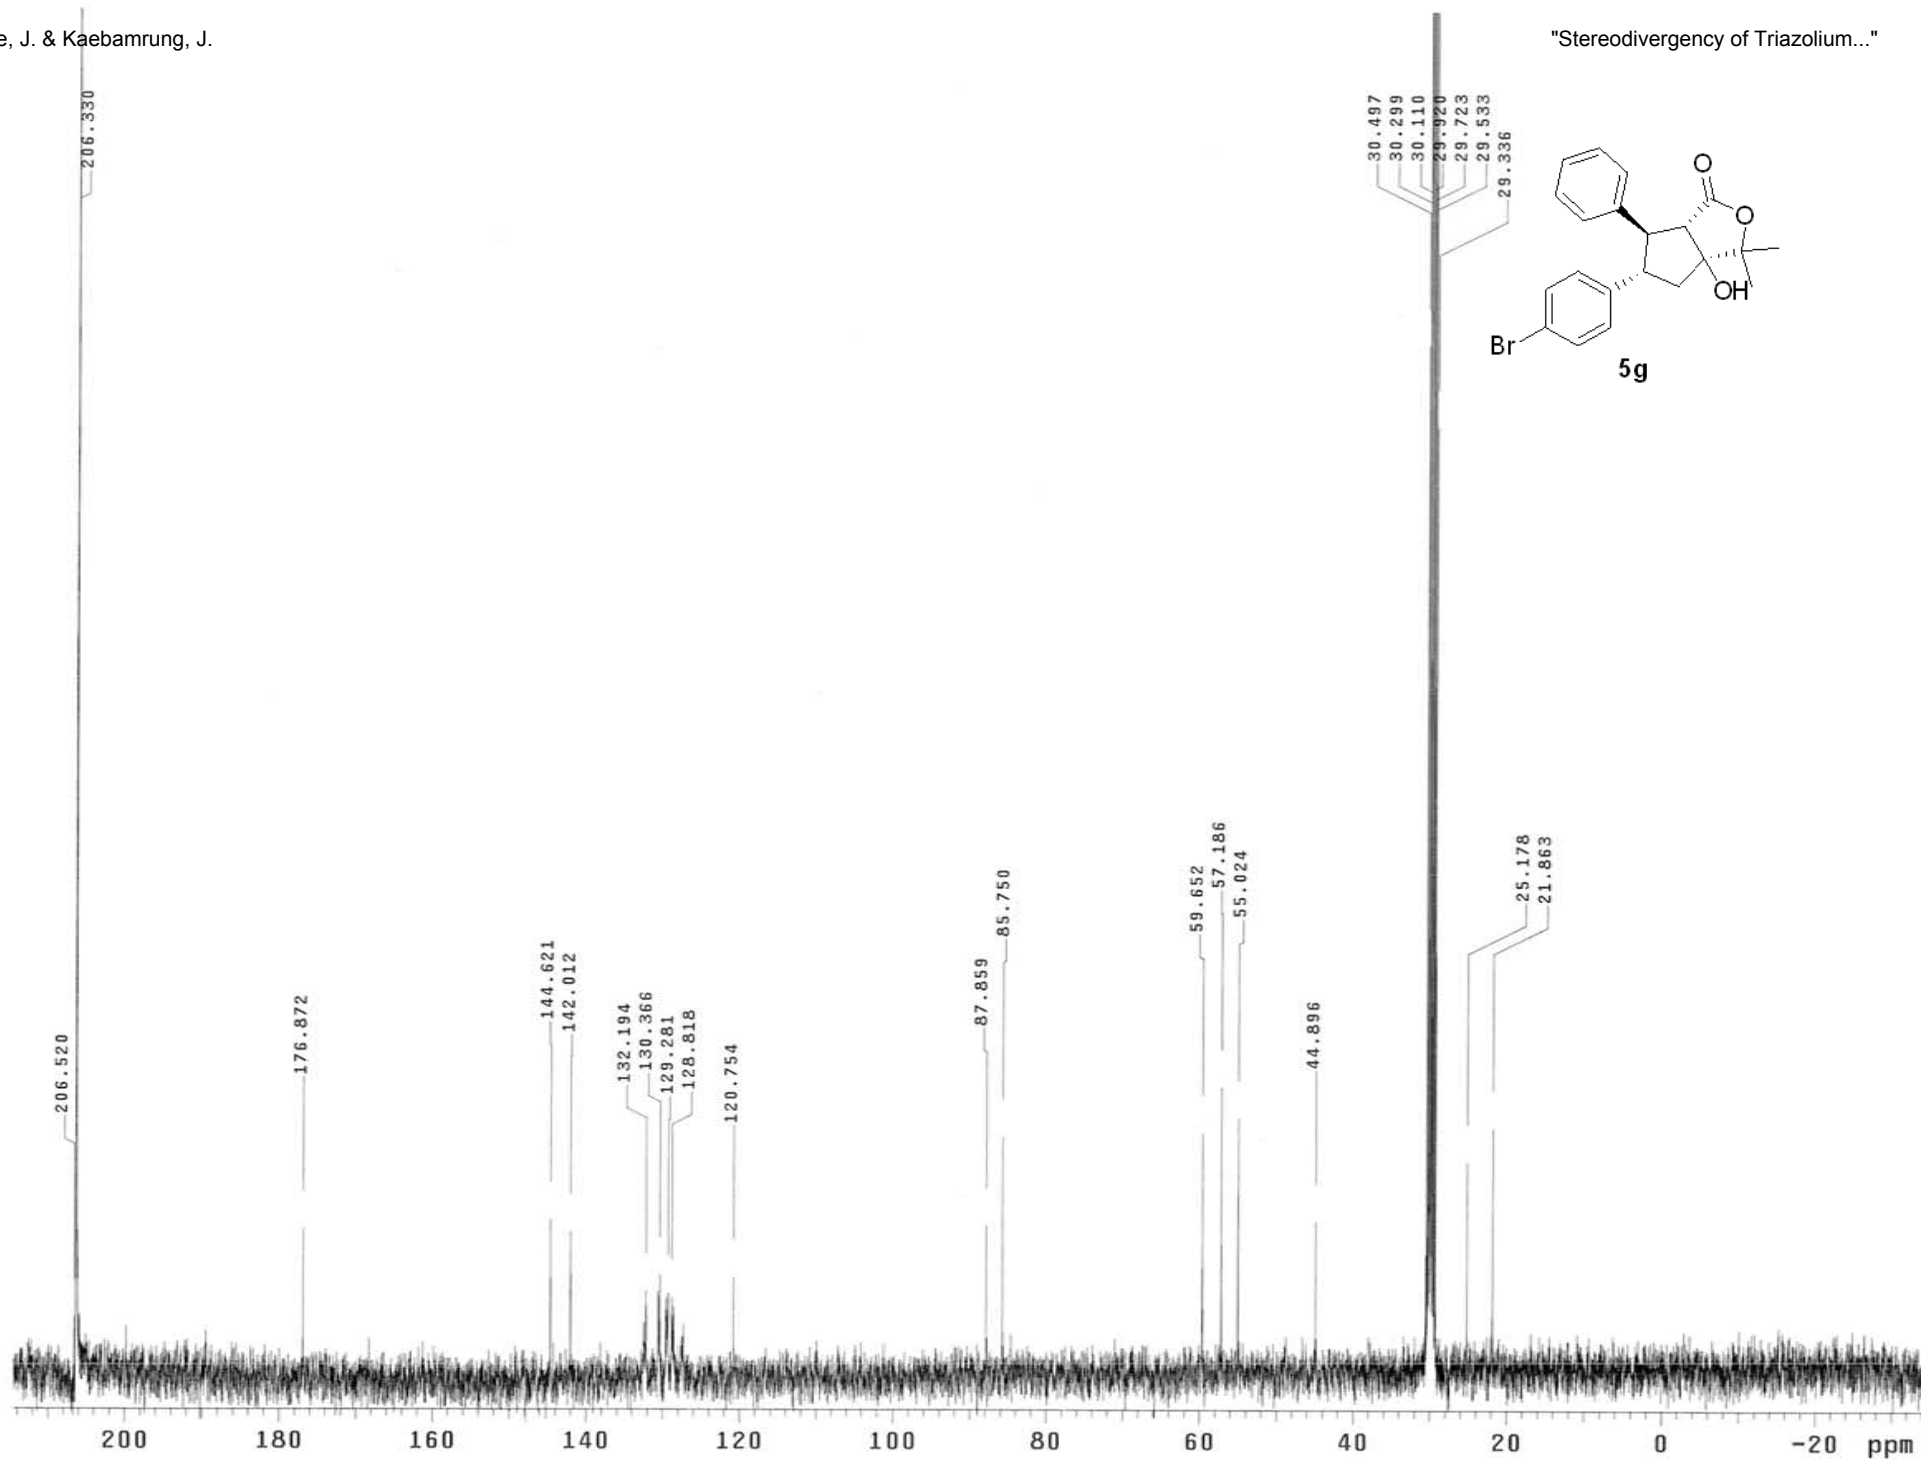

| INDEX | FREQUENCY | PPM   | HEIGHT |
|-------|-----------|-------|--------|
| 1     | 2948.203  | 7.371 | 41.0   |
| 2     | 2946.360  | 7.367 | 15.9   |
| 3     | 2941.600  | 7.355 | 16.7   |
| 4     | 2939.911  | 7.351 | 48.7   |
| 5     | 2904.748  | 7.263 | 56.3   |
| 6     | 2901.830  | 7.256 | 26.8   |
| 7     | 2900.141  | 7.251 | 21.0   |
| 8     | 2898.145  | 7.246 | 11.9   |
| 9     | 2894.306  | 7.237 | 34.3   |
| 10    | 2888.164  | 7.221 | 17.6   |
| 11    | 2886.628  | 7.217 | 17.6   |
| 12    | 2880.026  | 7.201 | 42.8   |
| 13    | 2878.337  | 7.197 | 40.4   |
| 14    | 2875.726  | 7.190 | 13.6   |
| 15    | 2873.730  | 7.185 | 18.9   |
| 16    | 2872.041  | 7.181 | 25.7   |
| 17    | 2827.204  | 7.069 | 46.8   |
| 18    | 2825.361  | 7.064 | 18.3   |
| 19    | 2818.758  | 7.048 | 43.1   |
| 20    | 1640.398  | 4.102 | 28.6   |
| 21    | 1632.874  | 4.083 | 32.9   |
| 22    | 1378.592  | 3.447 | 12.9   |
| 23    | 1371.068  | 3.428 | 12.8   |
| 24    | 1366.308  | 3.416 | 11.5   |
| 25    | 1358.784  | 3.397 | 10.6   |
| 26    | 1041.238  | 2.603 | 12.0   |
| 27    | 1034.942  | 2.588 | 12.6   |
| 28    | 1026.804  | 2.567 | 14.4   |
| 29    | 1020.508  | 2.552 | 13.8   |
| 30    | 835.938   | 2.090 | 15.6   |
| 31    | 824.268   | 2.061 | 18.2   |
| 32    | 821.351   | 2.054 | 20.8   |
| 33    | 819.815   | 2.050 | 38.2   |
| 34    | 809.834   | 2.025 | 17.9   |
| 35    | 635.860   | 1.590 | 19.1   |
| 36    | 559.851   | 1.400 | 137.6  |
| 37    | 557.241   | 1.393 | 151.2  |

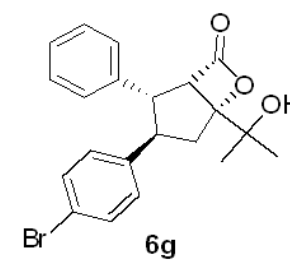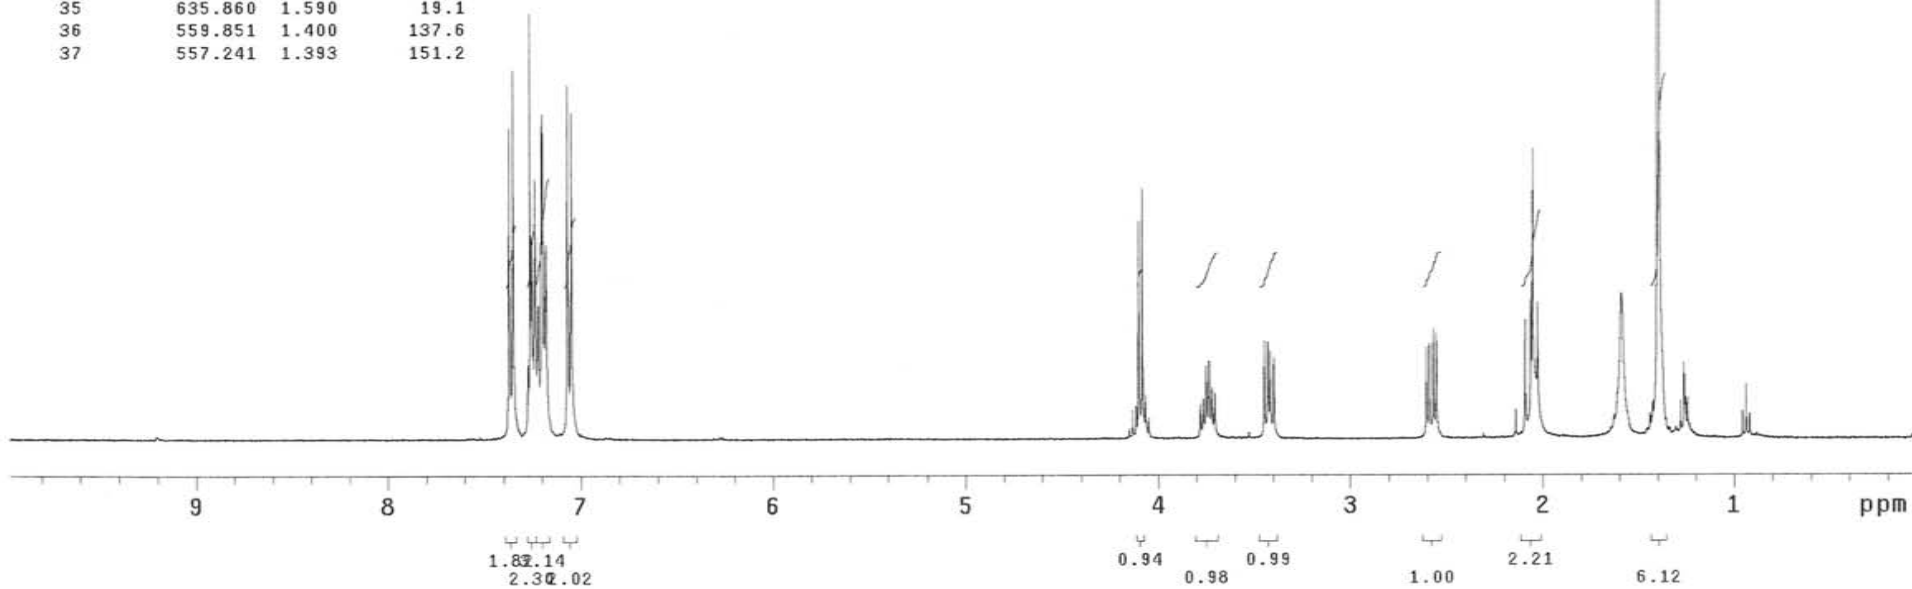

| INDEX | FREQUENCY | PPM     | HEIGHT |
|-------|-----------|---------|--------|
| 1     | 16956.688 | 168.611 | 15.8   |
| 2     | 13971.214 | 138.924 | 21.5   |
| 3     | 13627.881 | 135.510 | 17.3   |
| 4     | 13270.052 | 131.952 | 60.0   |
| 5     | 13003.778 | 129.304 | 56.9   |
| 6     | 12947.318 | 128.743 | 62.9   |
| 7     | 12903.067 | 128.303 | 63.2   |
| 8     | 12848.133 | 127.757 | 26.3   |
| 9     | 12169.096 | 121.005 | 18.4   |
| 10    | 9190.490  | 91.387  | 22.0   |
| 11    | 7798.846  | 77.549  | 154.8  |
| 12    | 7766.801  | 77.230  | 162.0  |
| 13    | 7734.757  | 76.911  | 161.8  |
| 14    | 7165.587  | 71.252  | 24.9   |
| 15    | 6053.950  | 60.198  | 23.9   |
| 16    | 5254.365  | 52.247  | 22.0   |
| 17    | 4685.958  | 46.595  | 20.1   |
| 18    | 3999.291  | 39.767  | 13.2   |
| 19    | 2526.010  | 25.118  | 16.2   |
| 20    | 2490.914  | 24.769  | 19.3   |

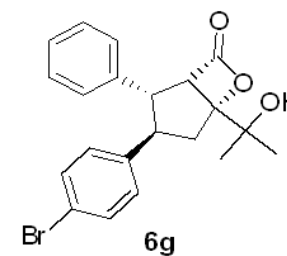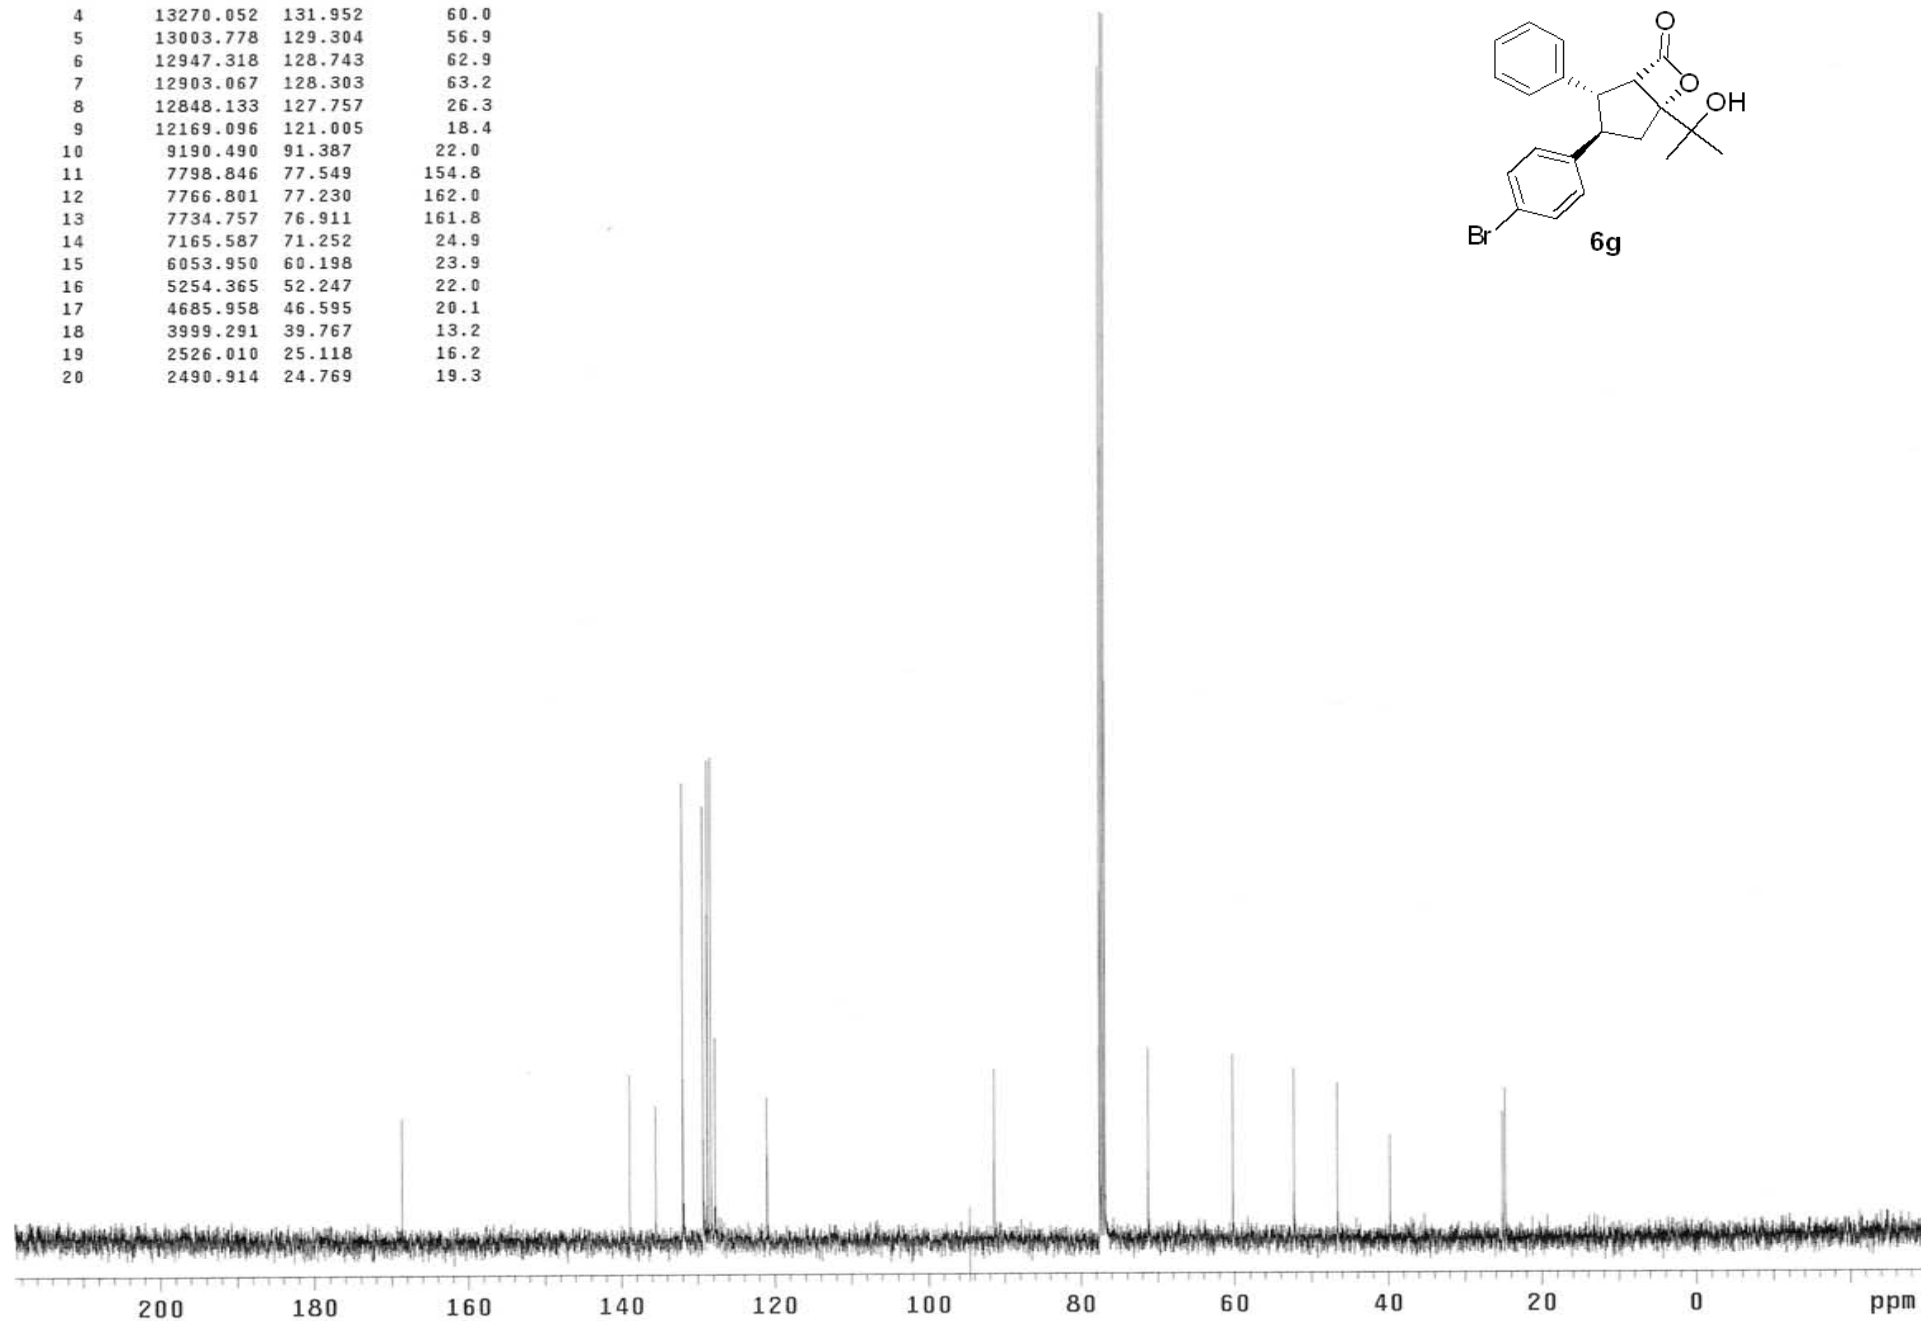



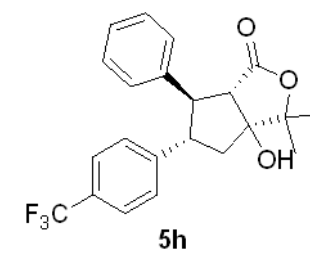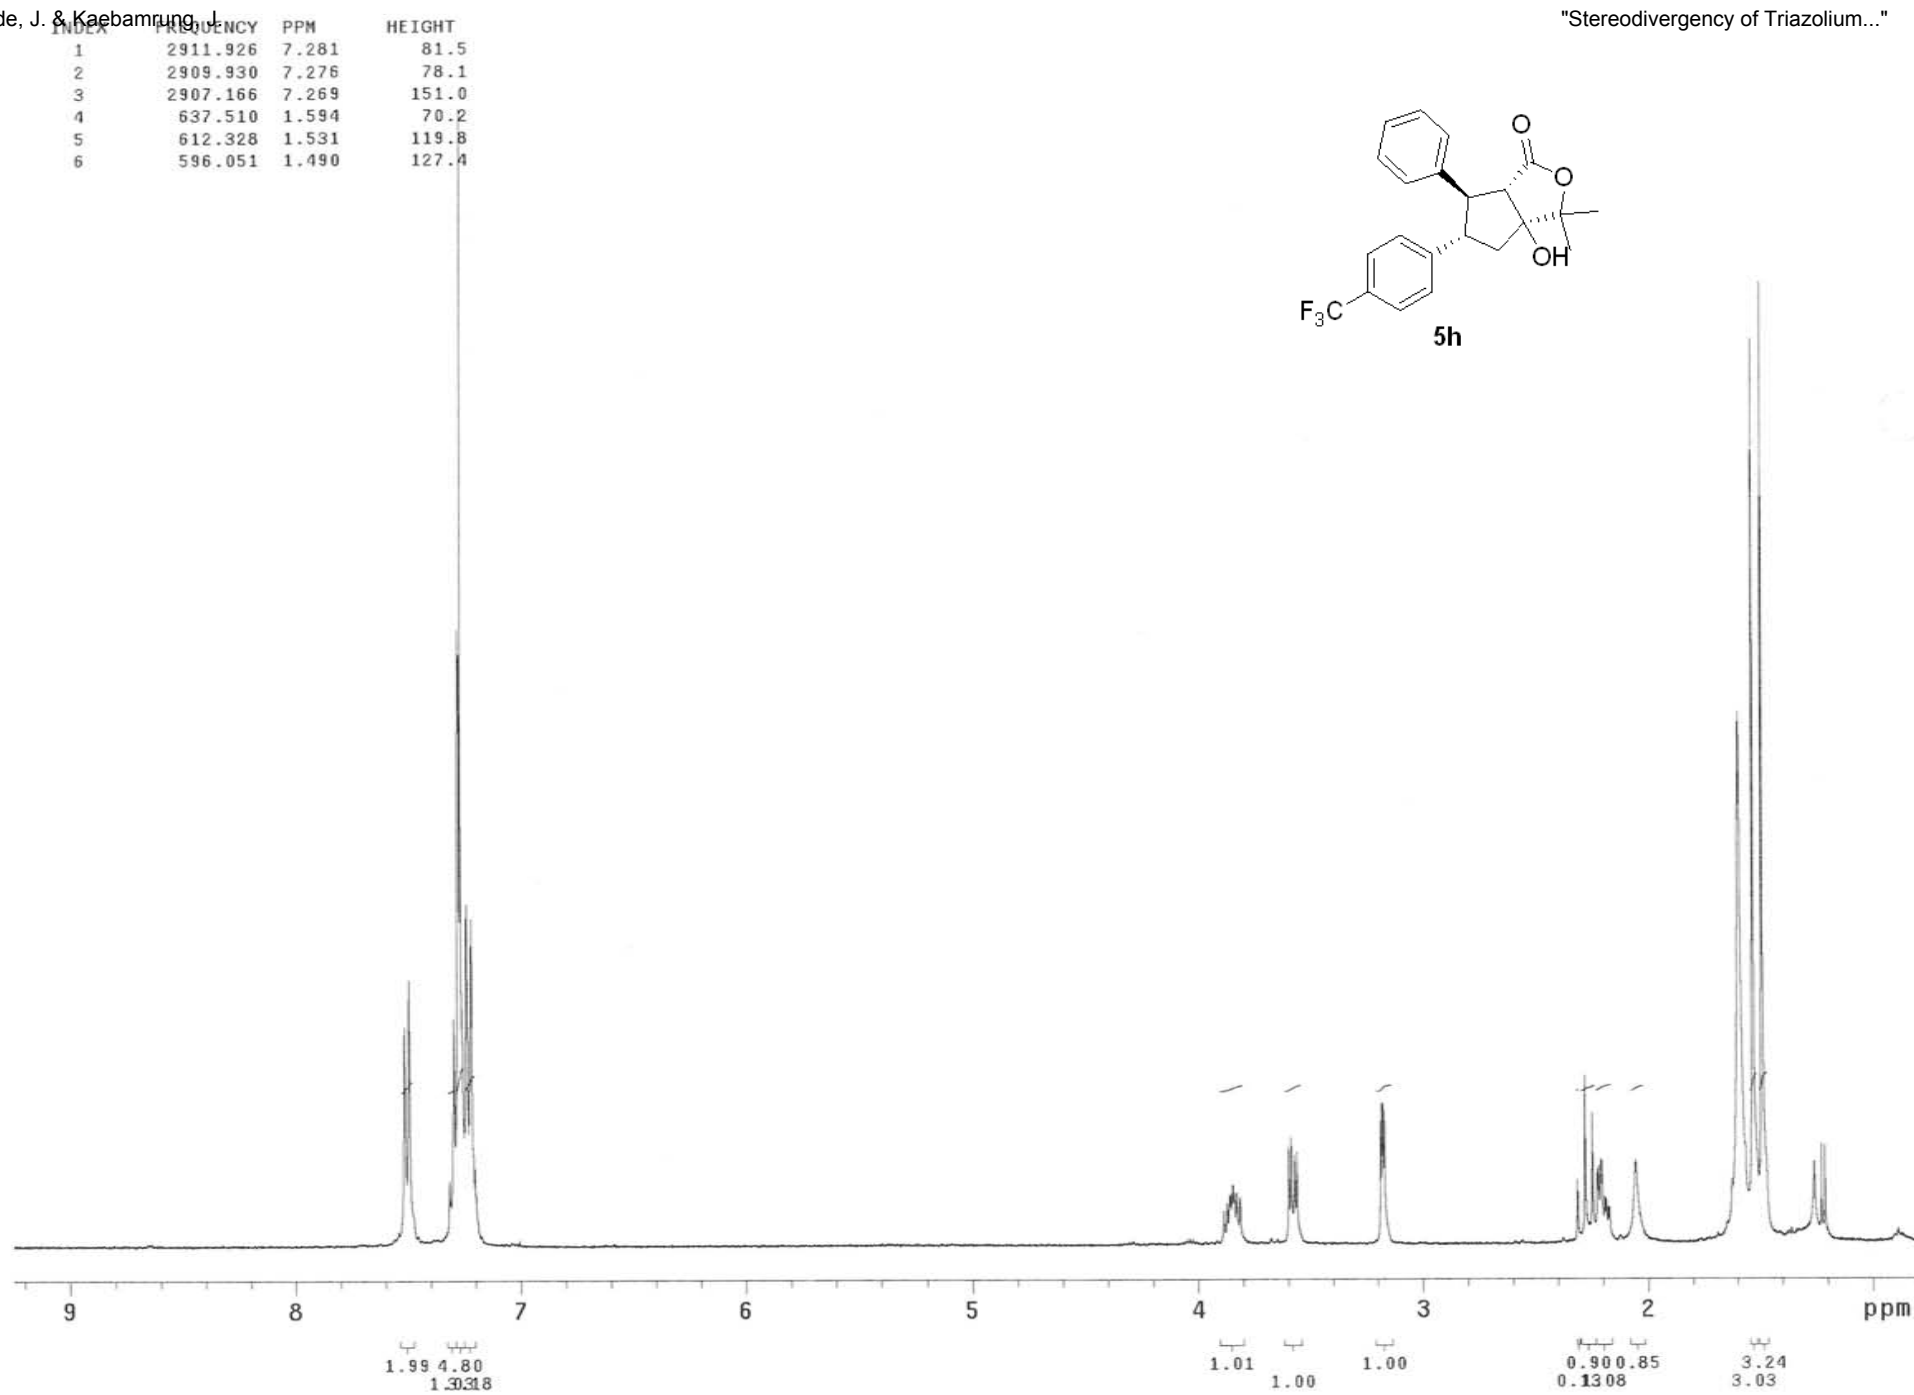

| Peak | FREQUENCY | PPM     | HEIGHT |
|------|-----------|---------|--------|
| 1    | 17737.198 | 176.372 | 8.6    |
| 2    | 16939.139 | 168.436 | -5.0   |
| 3    | 16074.702 | 159.840 | -4.4   |
| 4    | 14589.214 | 145.069 | 5.2    |
| 5    | 14359.562 | 142.786 | 11.6   |
| 6    | 12977.837 | 129.046 | 35.6   |
| 7    | 12855.000 | 127.825 | 39.1   |
| 8    | 12852.711 | 127.802 | 39.6   |
| 9    | 12790.148 | 127.180 | 15.8   |
| 10   | 12645.948 | 125.746 | 14.7   |
| 11   | 12642.133 | 125.708 | 13.7   |
| 12   | 8847.919  | 87.980  | 13.3   |
| 13   | 8554.179  | 85.059  | 11.6   |
| 14   | 7798.846  | 77.549  | 202.4  |
| 15   | 7766.801  | 77.230  | 210.3  |
| 16   | 7734.757  | 76.911  | 209.4  |
| 17   | 5963.920  | 59.303  | 14.5   |
| 18   | 5610.668  | 55.790  | 12.0   |
| 19   | 5435.187  | 54.045  | 10.9   |
| 20   | 4460.121  | 44.350  | 6.9    |
| 21   | 2484.047  | 24.700  | 9.1    |
| 22   | 2169.707  | 21.575  | 12.3   |
| 23   | 1873.677  | 18.631  | -4.6   |

"Stereodivergency of Triazolium..."

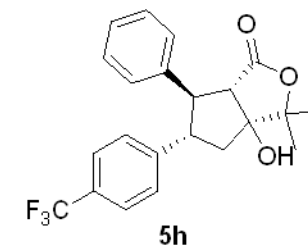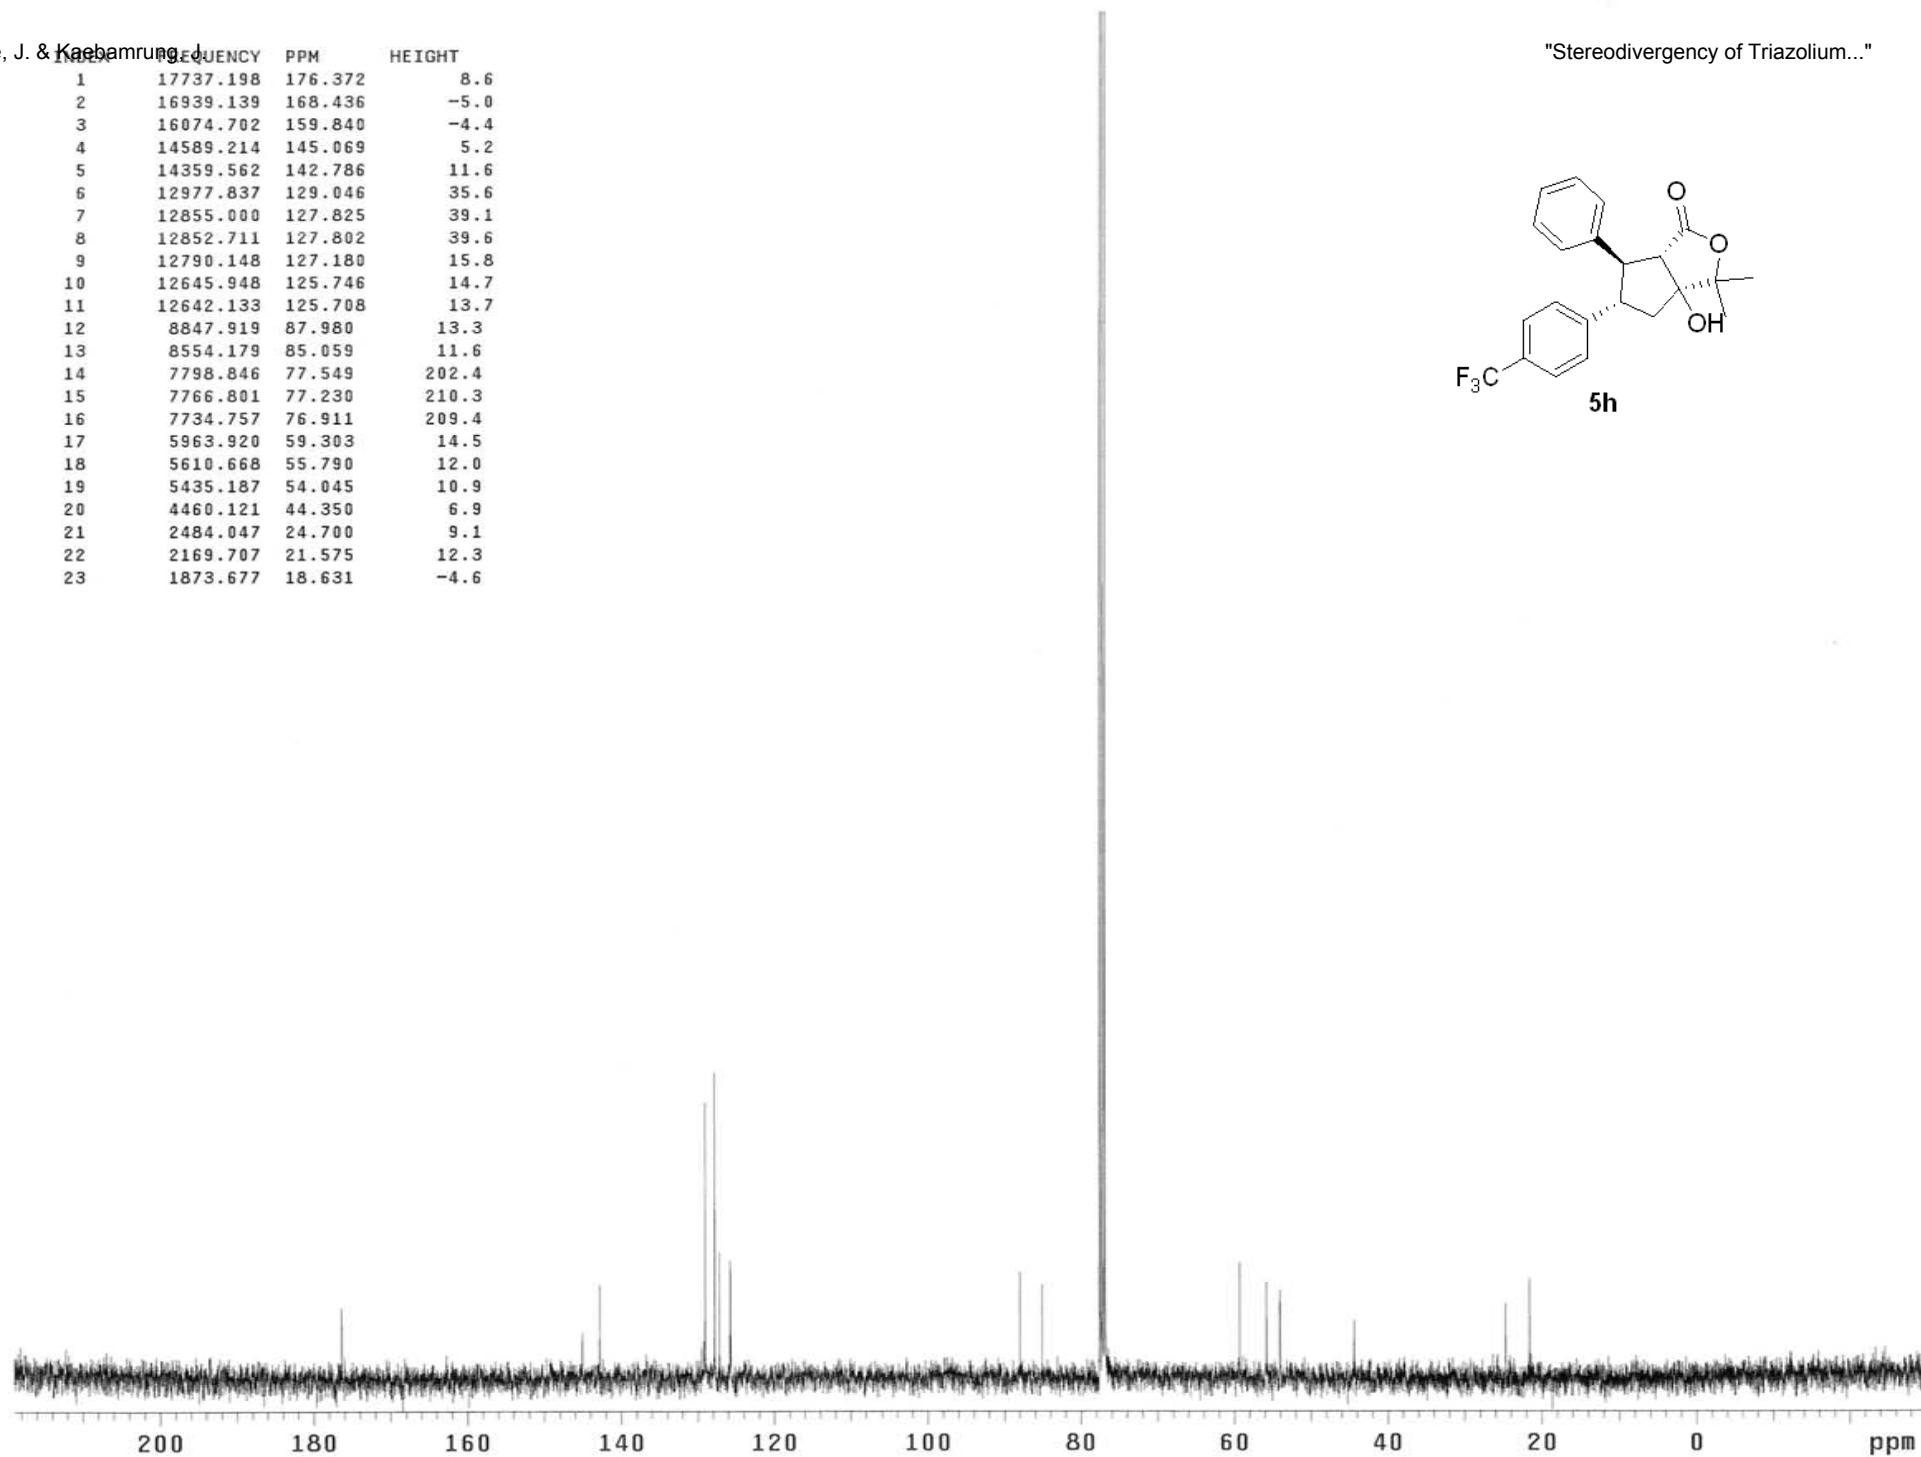

| INDEX | FREQUENCY | PPM   | HEIGHT |
|-------|-----------|-------|--------|
| 1     | 2904.901  | 7.263 | 123.7  |
| 2     | 626.186   | 1.566 | 151.2  |
| 3     | 564.304   | 1.411 | 82.9   |
| 4     | 562.308   | 1.406 | 85.5   |

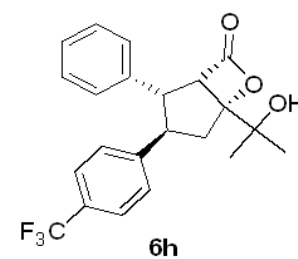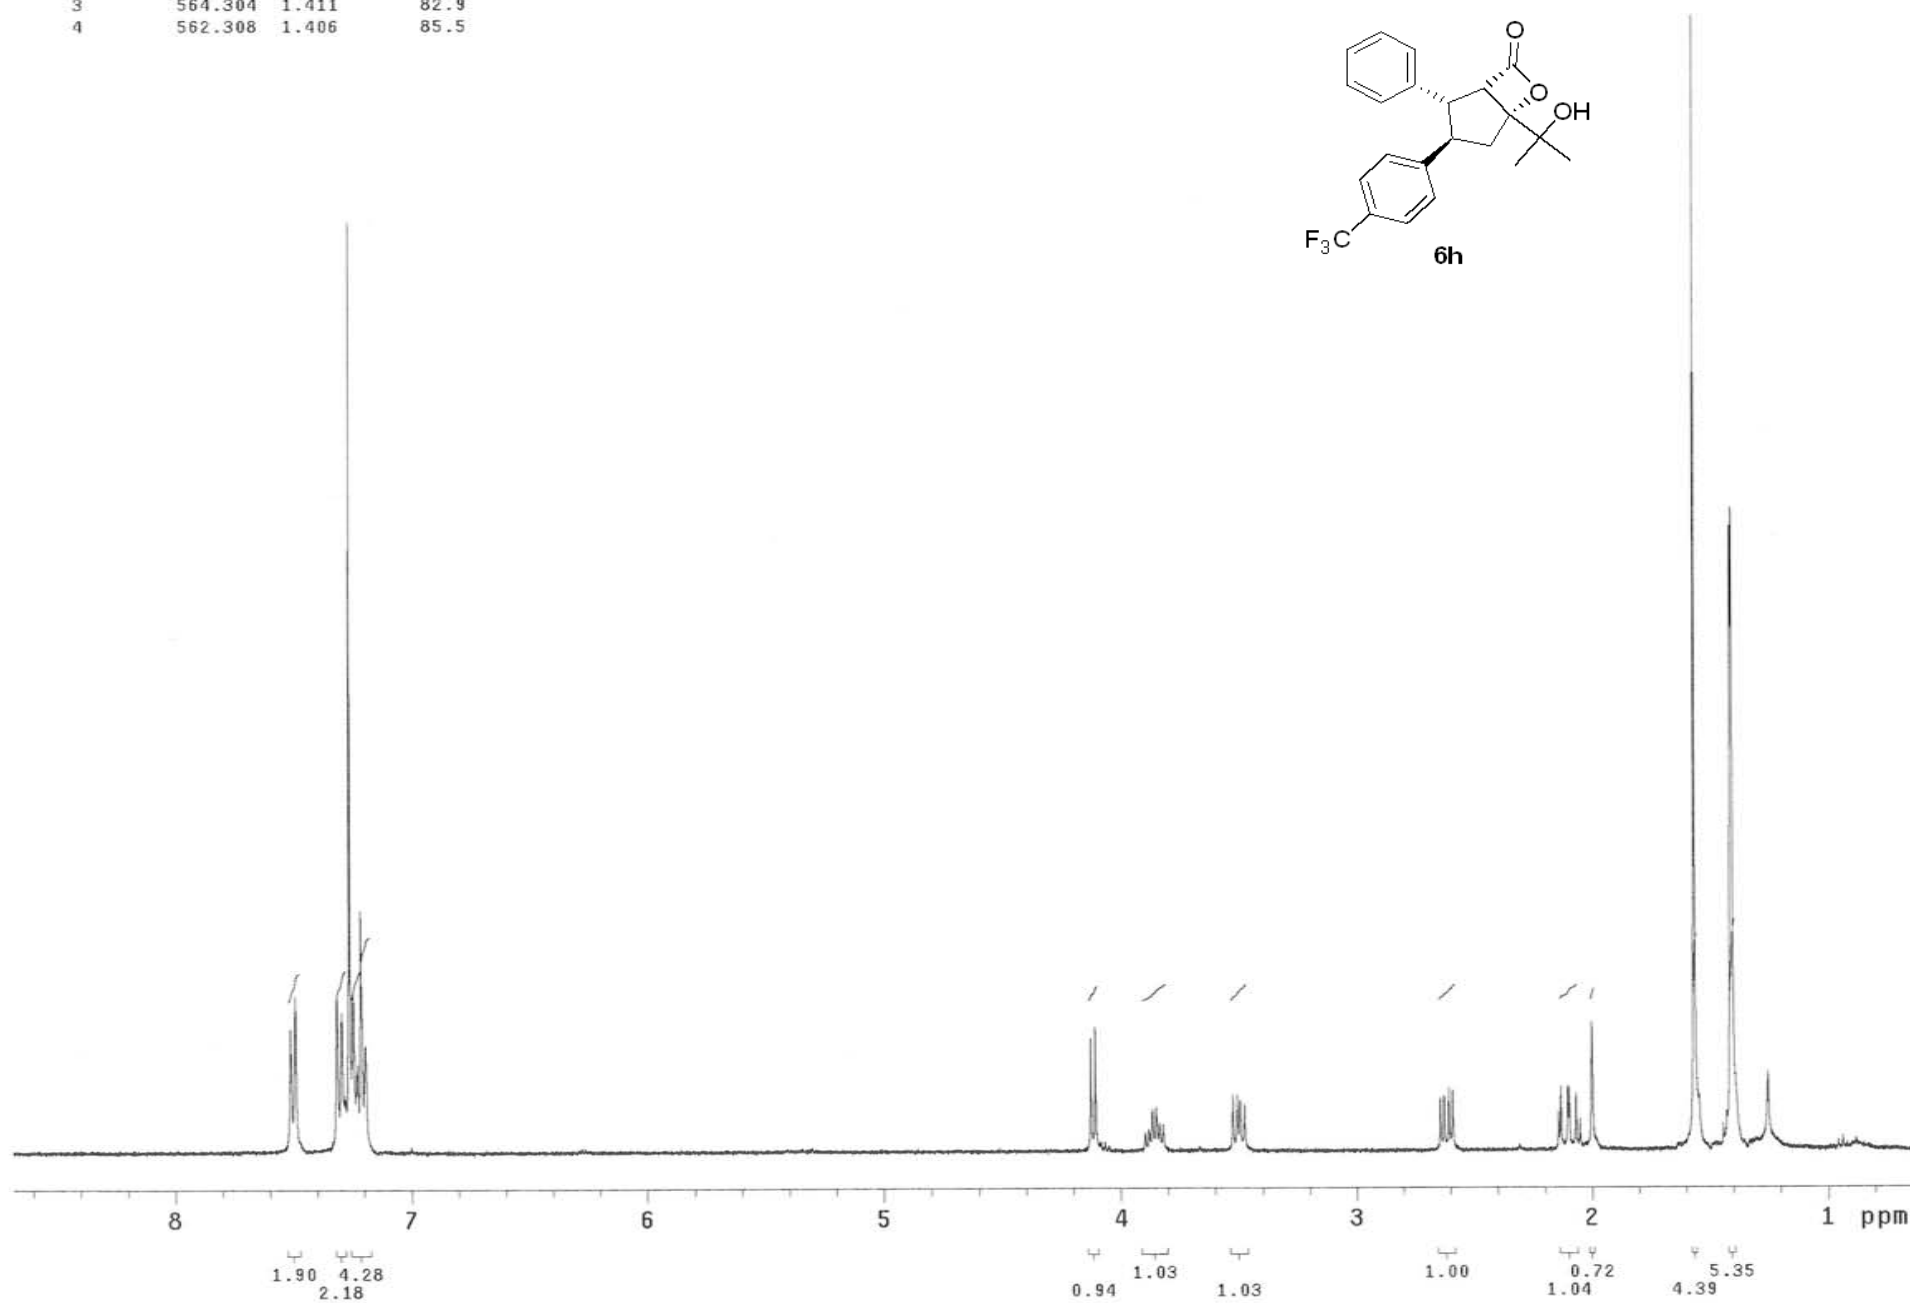

| INDEX | FREQUENCY | PPM     | HEIGHT |
|-------|-----------|---------|--------|
| 1     | 16939.139 | 168.436 | 7.3    |
| 2     | 14487.740 | 144.060 | 4.3    |
| 3     | 13608.807 | 135.321 | 8.7    |
| 4     | 12956.474 | 128.834 | 33.6   |
| 5     | 12900.777 | 128.280 | 33.7   |
| 6     | 12871.022 | 127.984 | 30.3   |
| 7     | 12861.103 | 127.886 | 15.1   |
| 8     | 12658.155 | 125.868 | 9.9    |
| 9     | 12654.340 | 125.830 | 11.3   |
| 10    | 9188.201  | 91.364  | 10.2   |
| 11    | 7798.846  | 77.549  | 158.3  |
| 12    | 7766.801  | 77.230  | 161.8  |
| 13    | 7734.757  | 76.911  | 157.5  |
| 14    | 7167.875  | 71.275  | 11.7   |
| 15    | 6066.157  | 60.319  | 13.0   |
| 16    | 5242.157  | 52.126  | 12.4   |
| 17    | 4711.135  | 46.846  | 10.1   |
| 18    | 4007.684  | 39.851  | 6.7    |
| 19    | 2530.588  | 25.163  | 8.3    |
| 20    | 2493.966  | 24.799  | 10.2   |

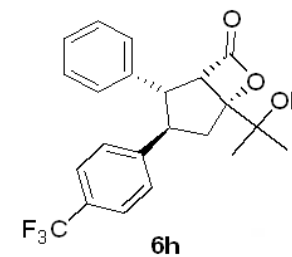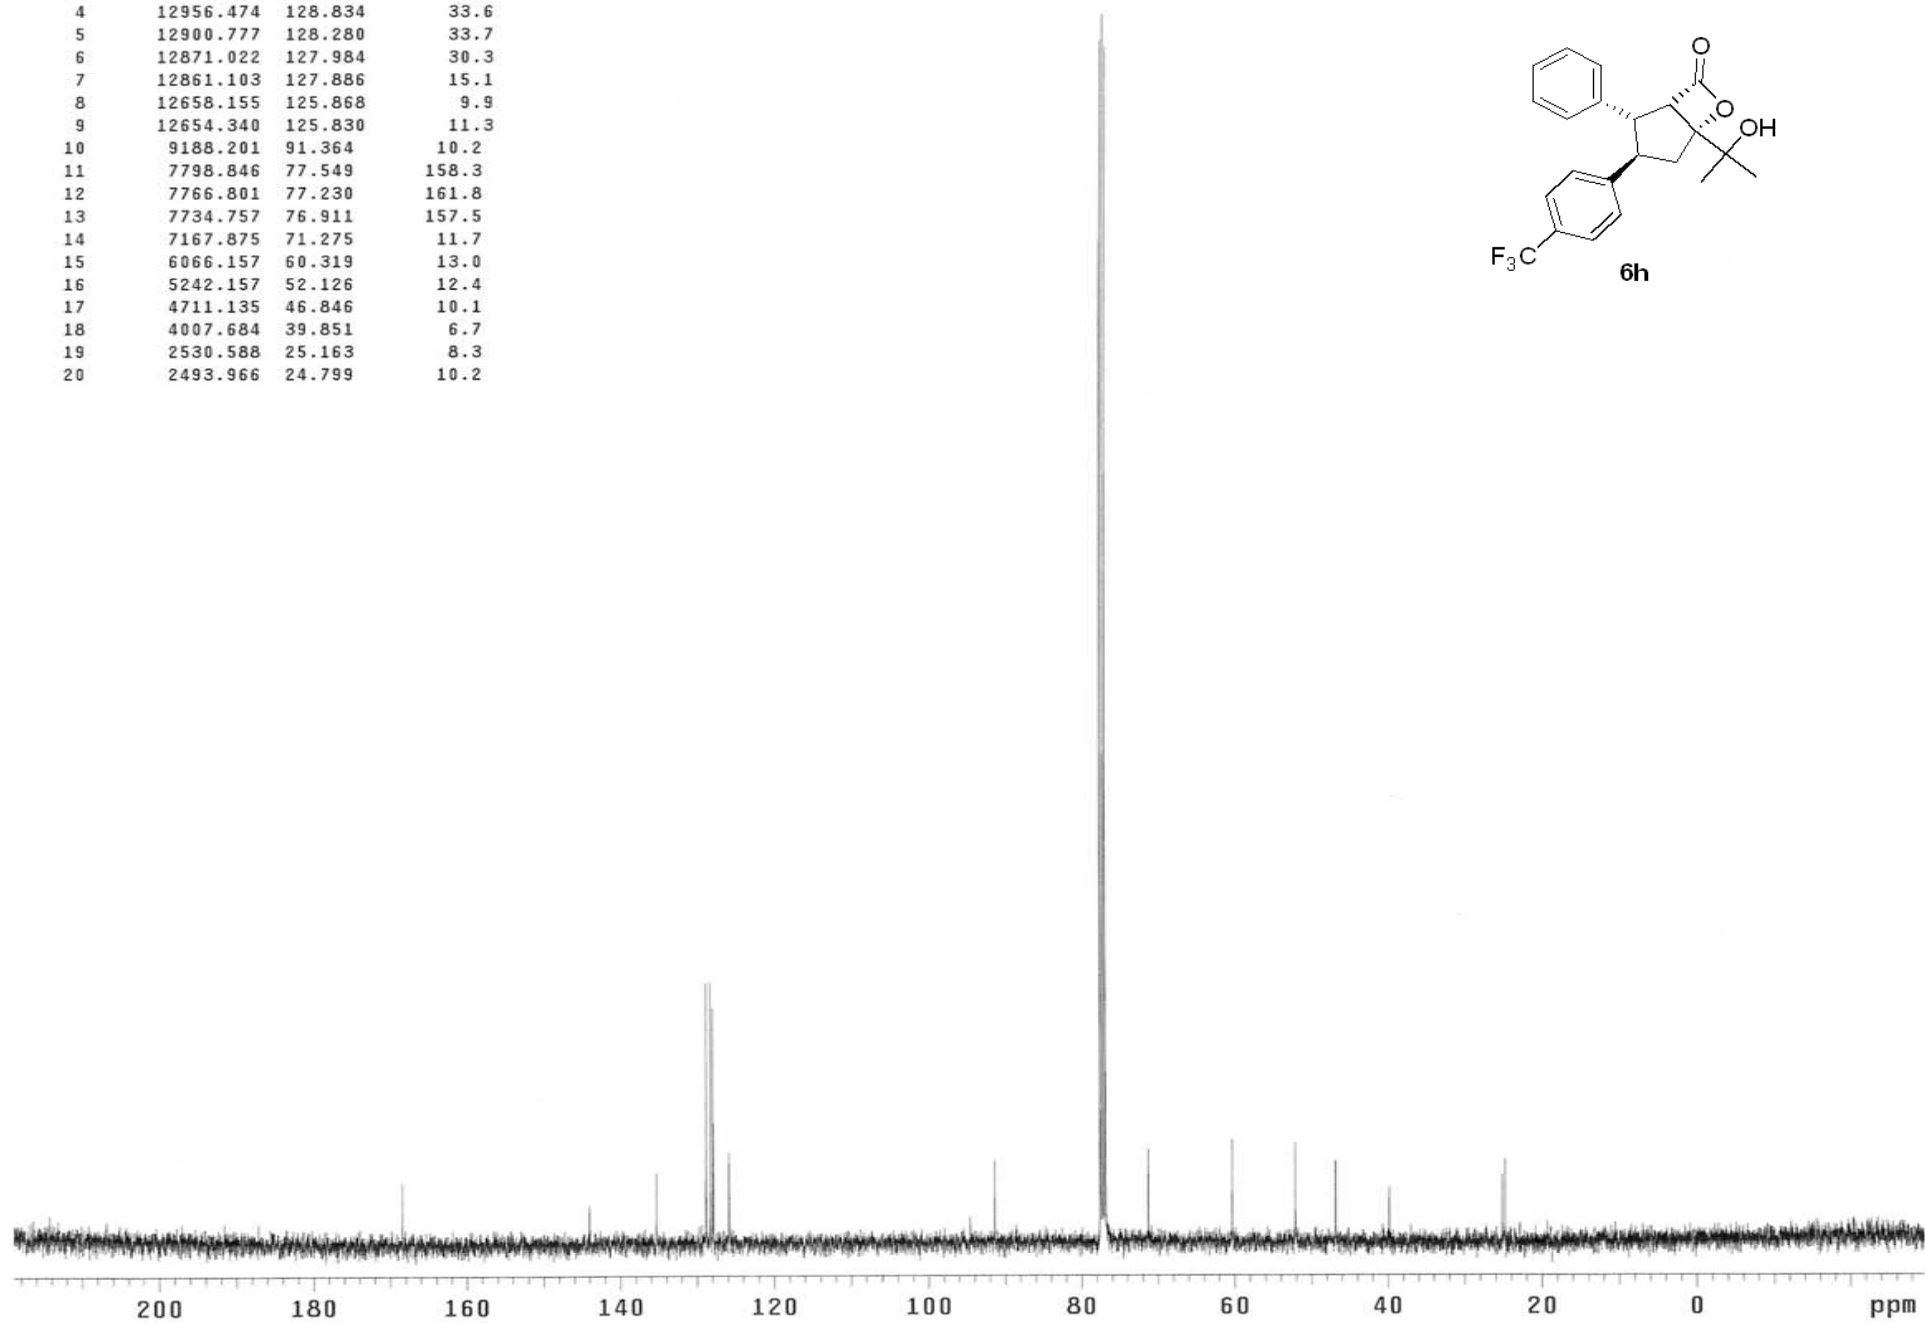

| INDEX | FREQUENCY | PPM   | HEIGHT |
|-------|-----------|-------|--------|
| 1     | 1365.386  | 3.414 | 151.2  |
| 2     | 578.738   | 1.447 | 95.2   |
| 3     | 548.795   | 1.372 | 93.1   |

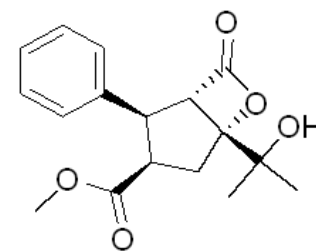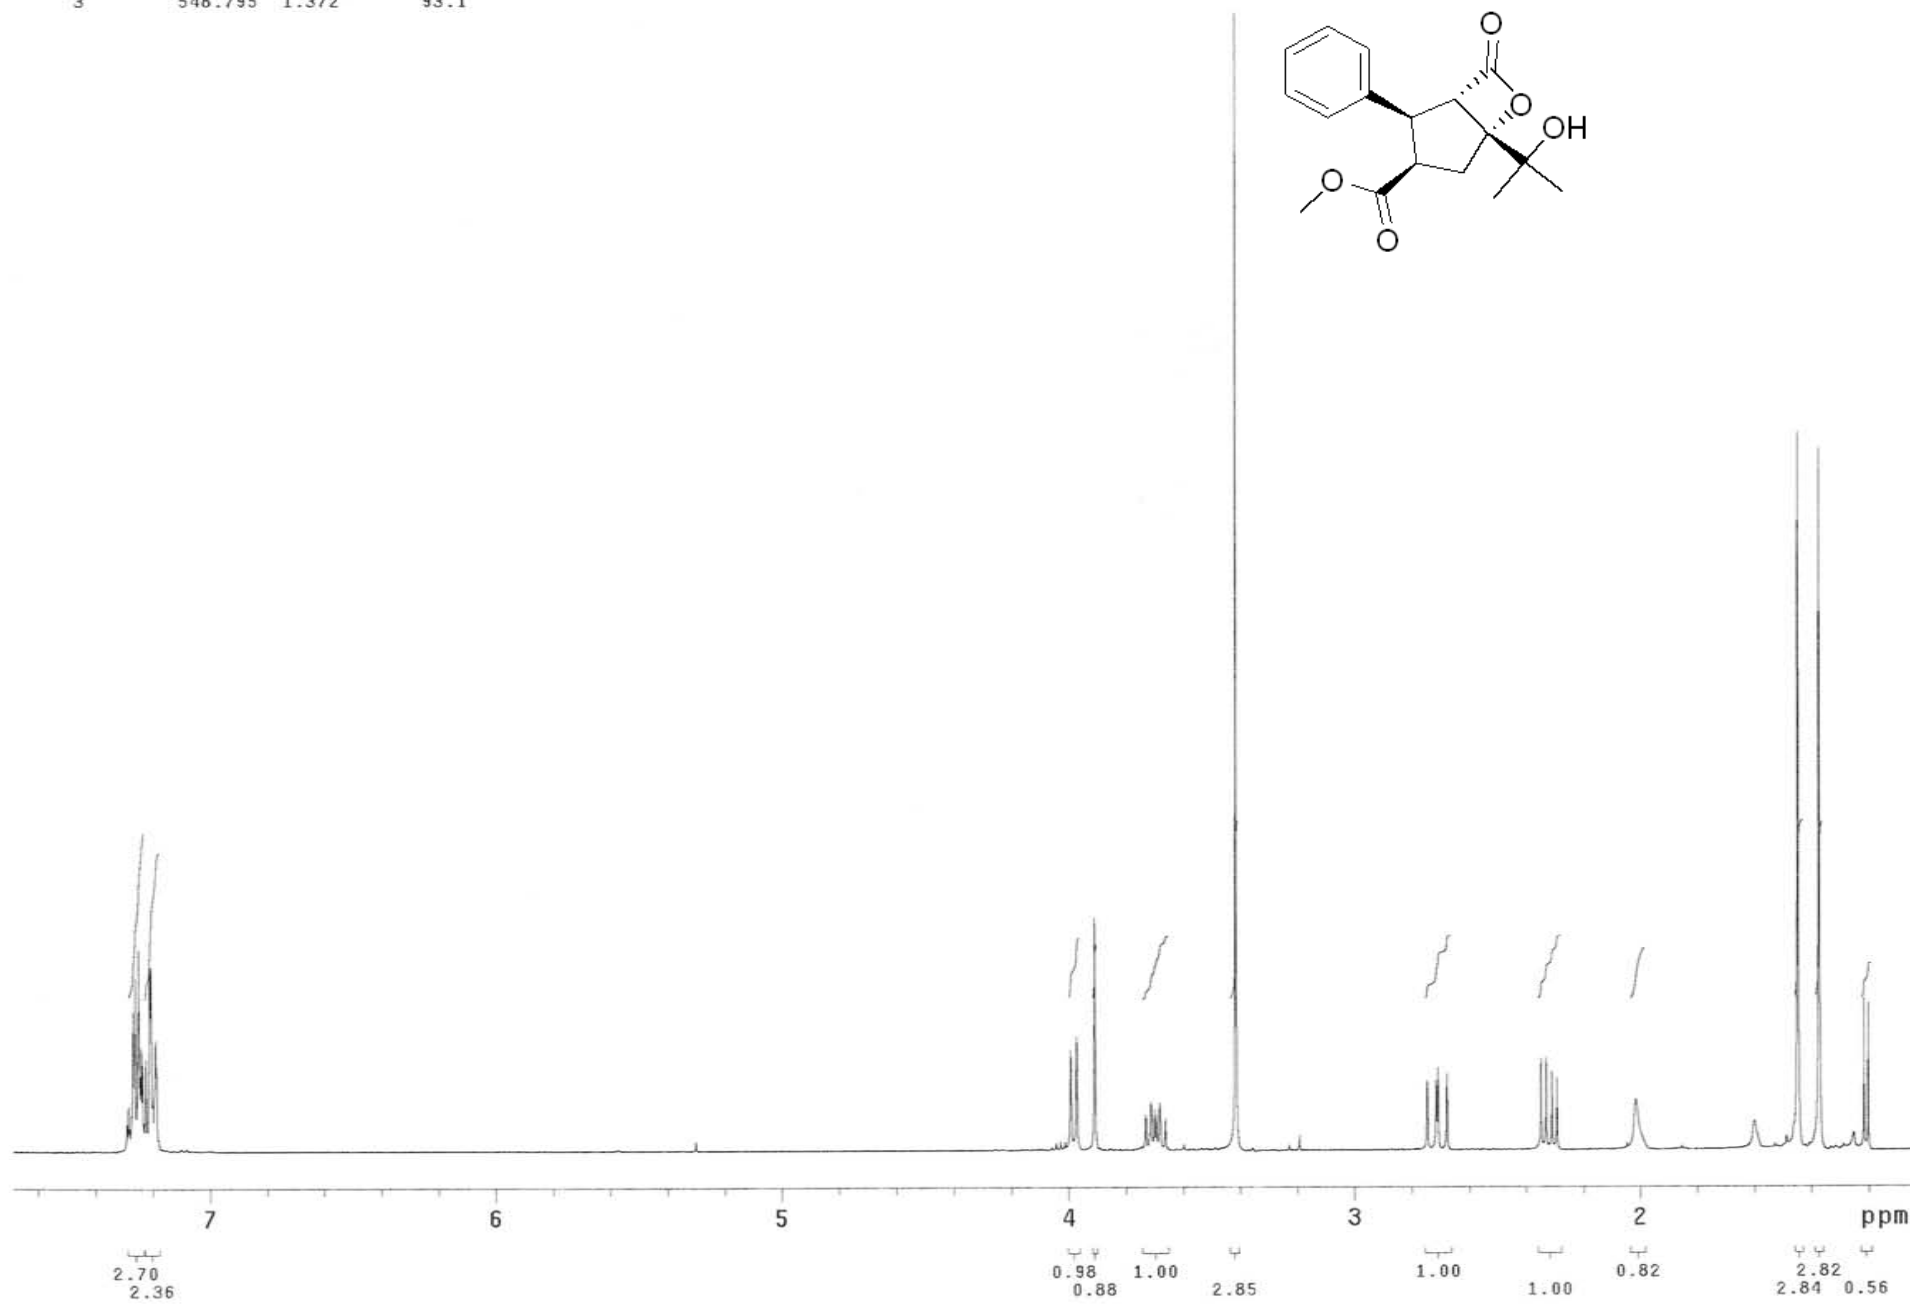

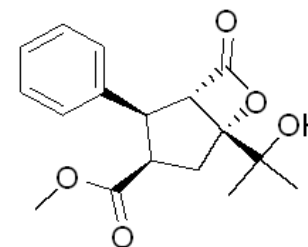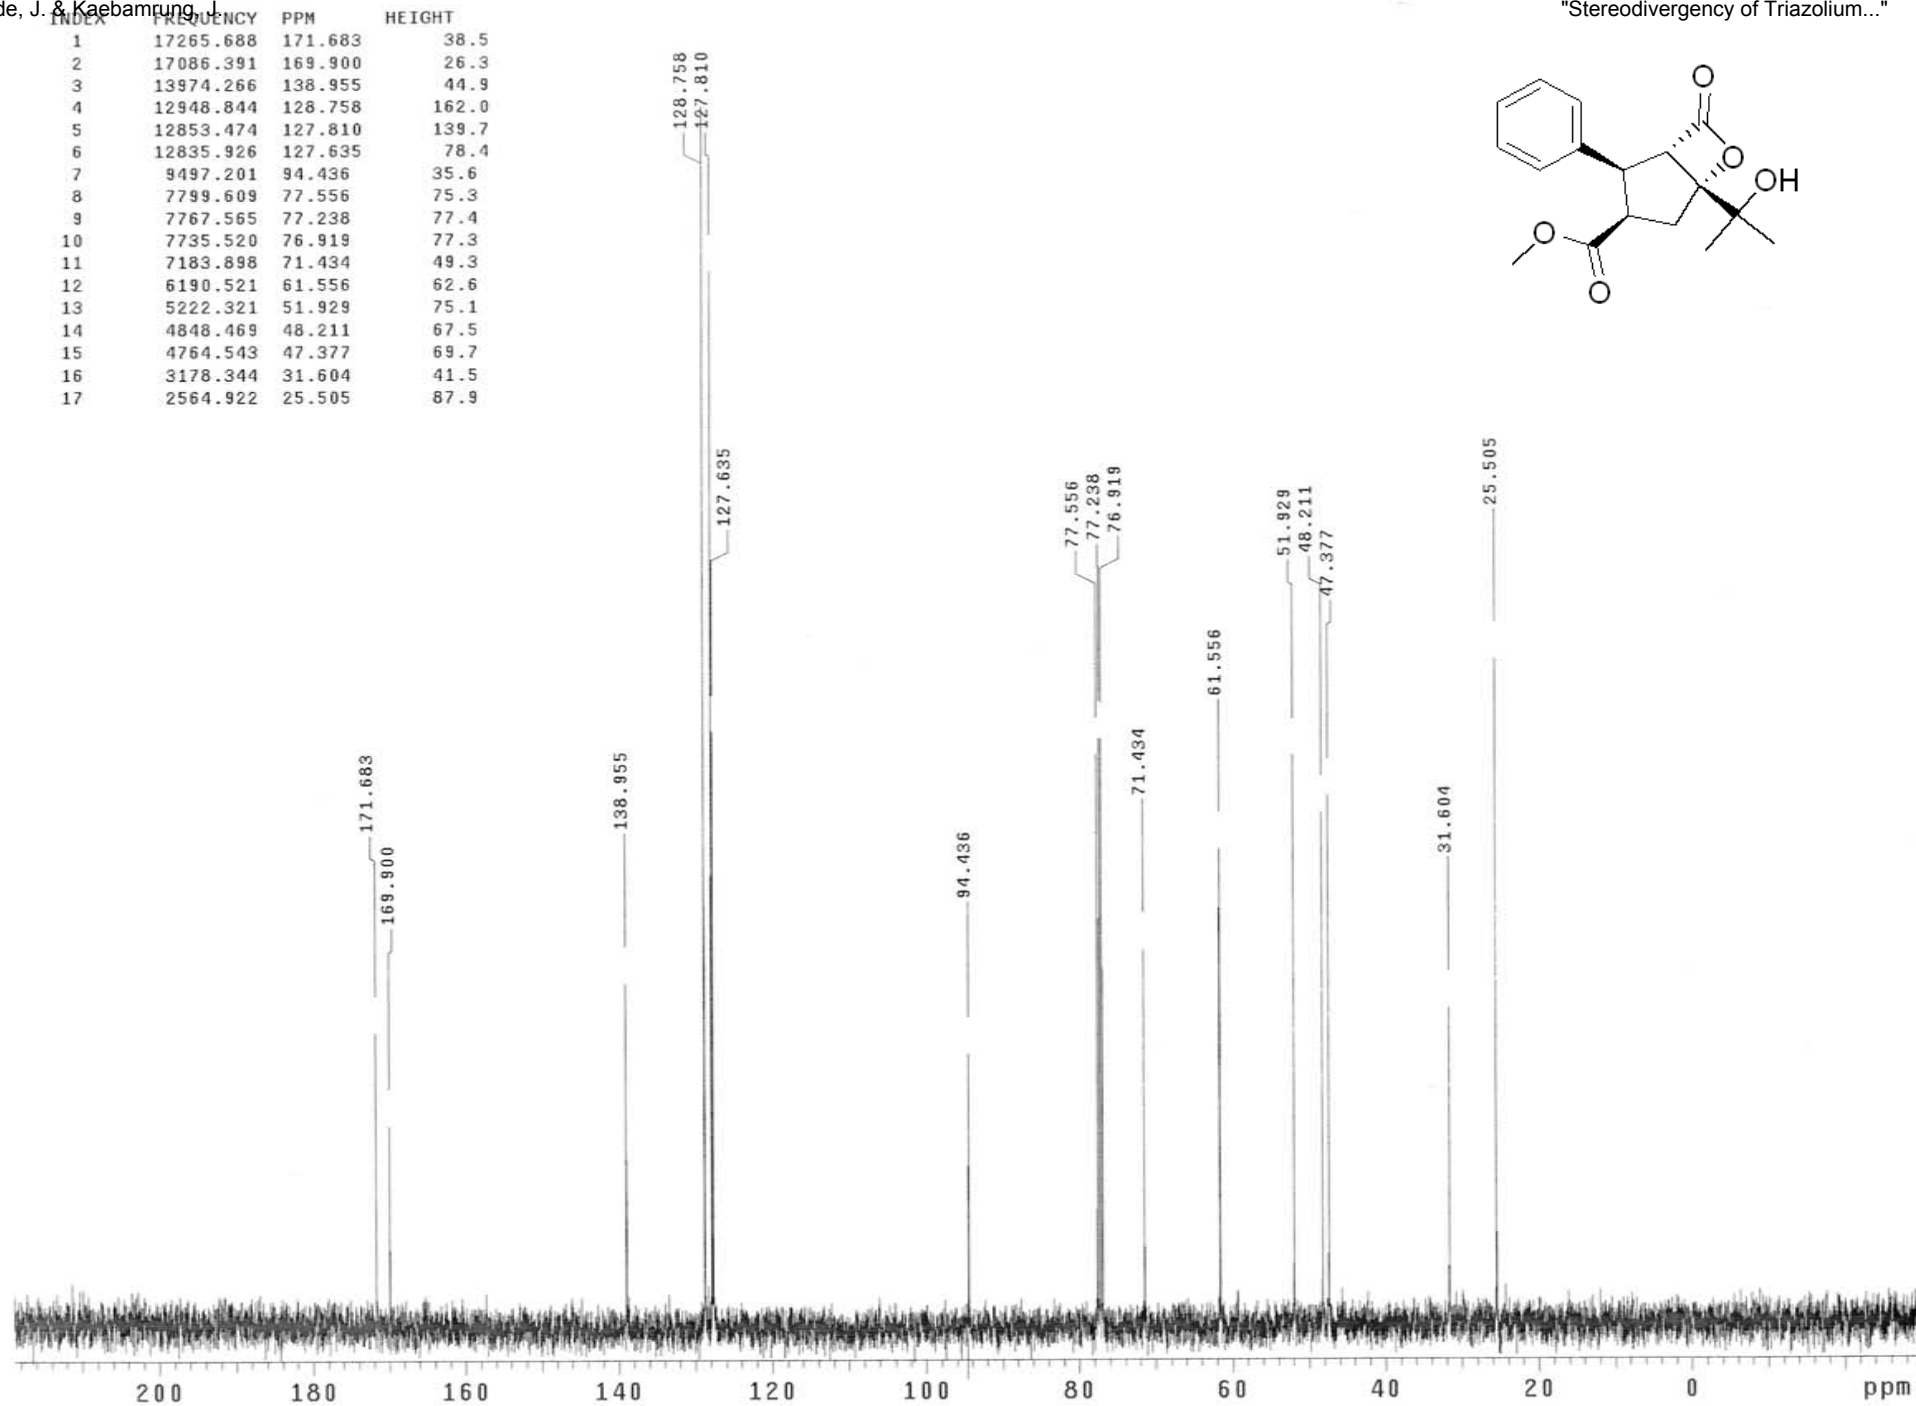

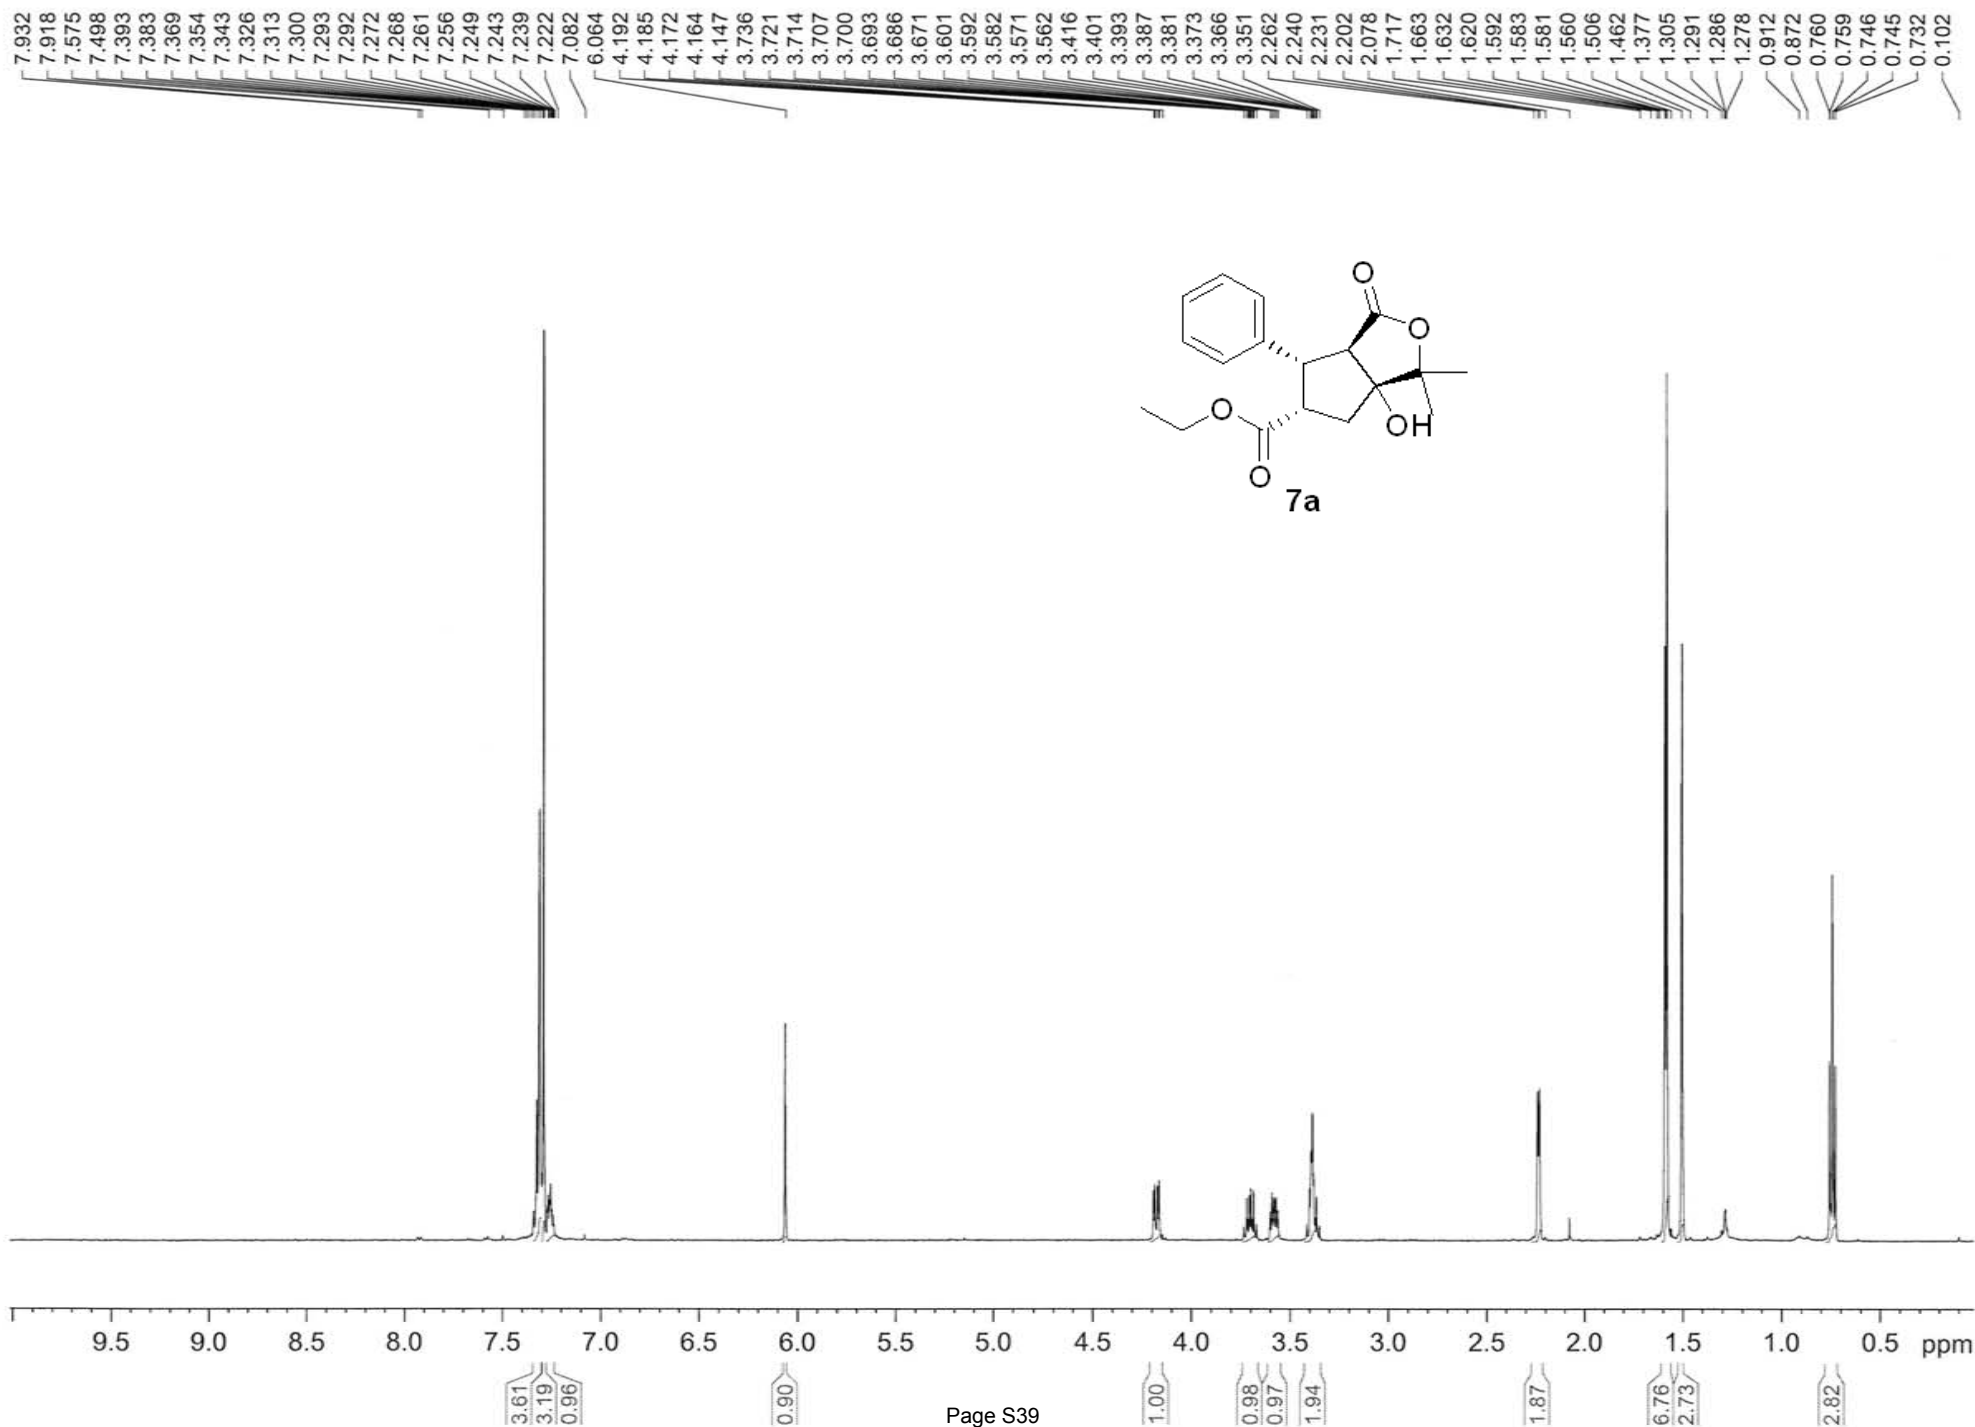

177.175  
176.746

139.778

128.516  
128.419  
127.264

88.733  
85.194

61.736  
58.377  
51.954  
51.427

38.337  
24.719  
21.330  
13.319

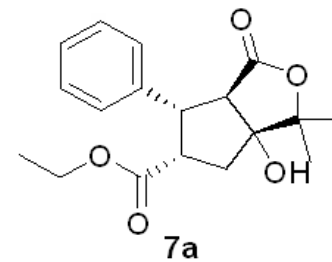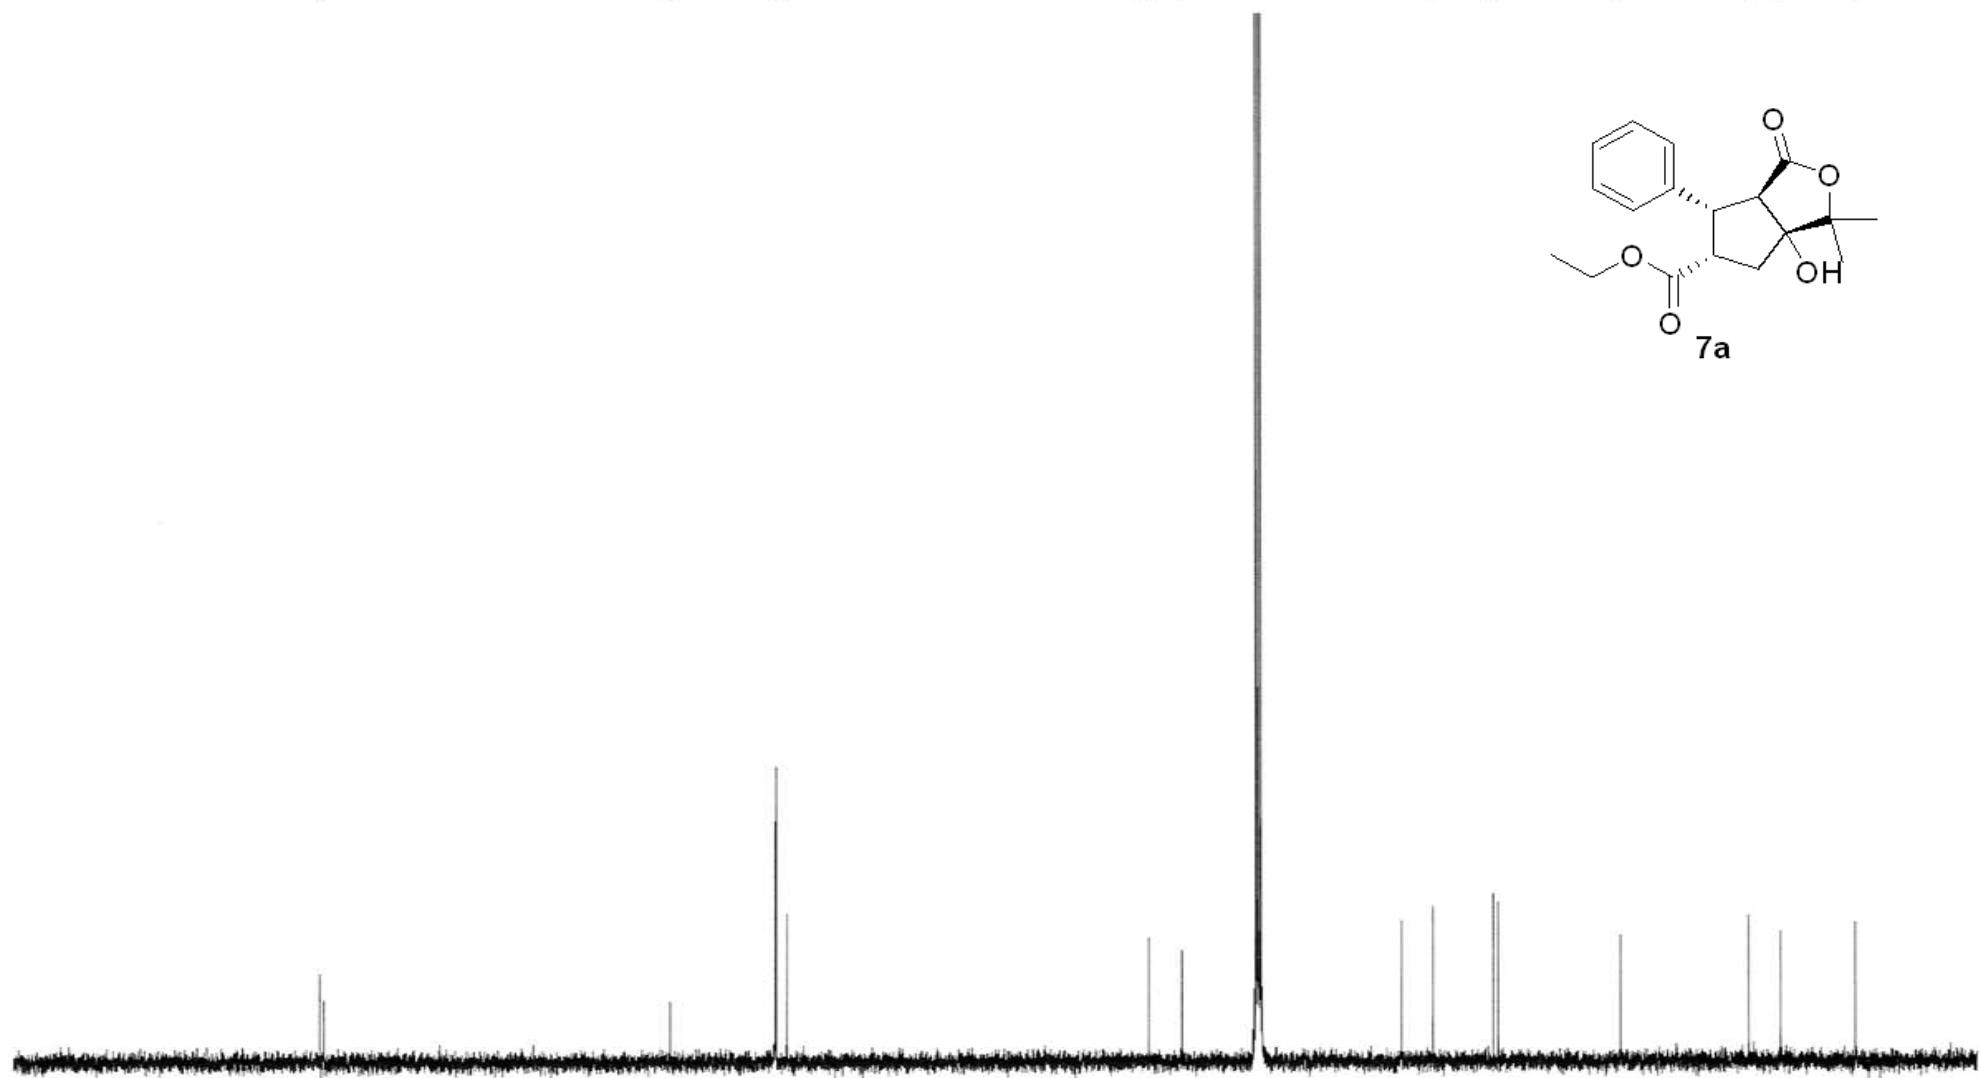



7.386  
7.371  
7.340  
7.325  
7.310  
7.250  
7.236  
7.221

4.130  
4.123  
4.116  
4.109  
4.094  
4.080  
4.072  
4.066  
4.058  
3.825  
3.816  
3.805  
3.796  
3.481  
3.469  
3.461  
3.455  
3.449  
3.443  
3.436  
3.424  
3.070  
3.065  
3.061  
3.056  
2.297  
2.271  
2.244  
2.181  
2.176  
2.169  
2.164  
2.154  
2.149  
2.142  
2.137  
1.883  
1.555  
1.474  
1.456  
1.194

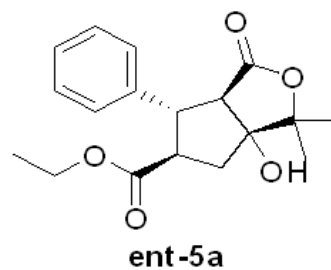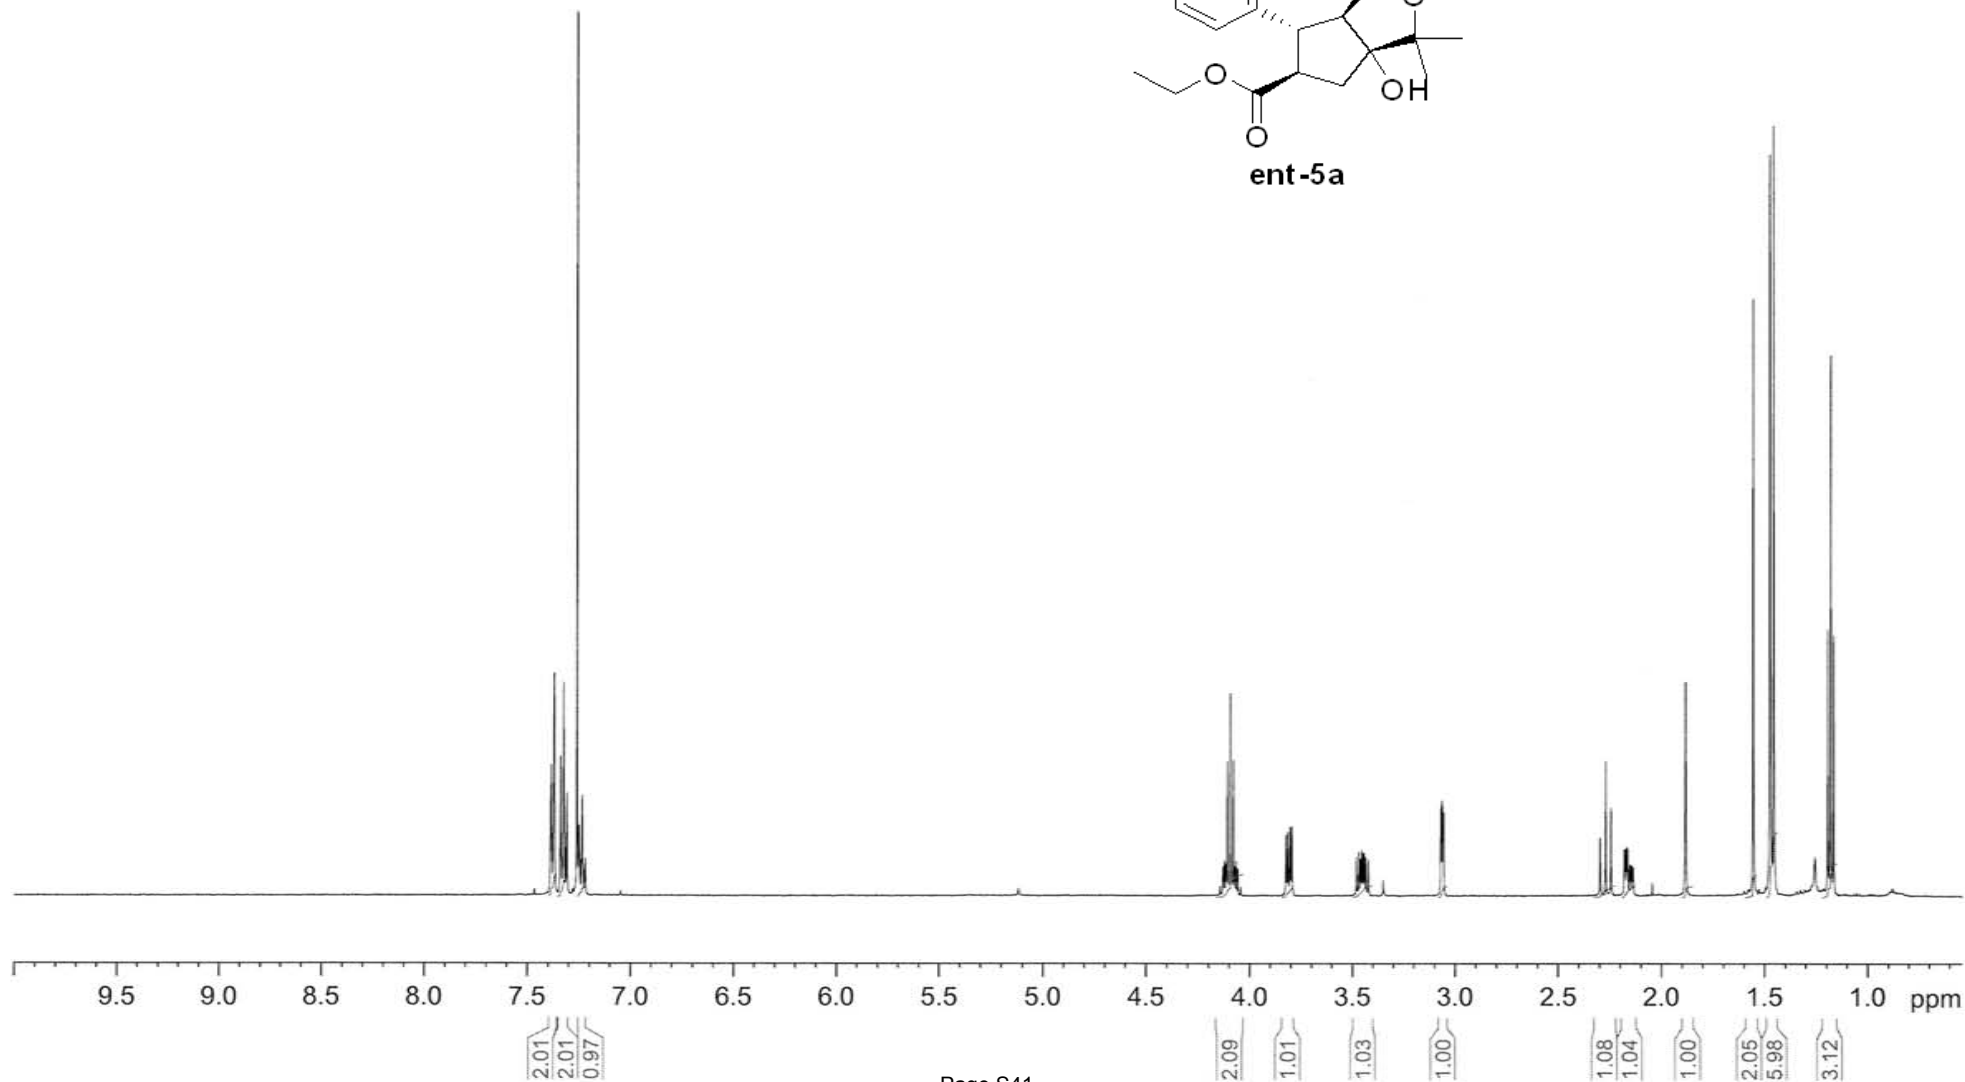

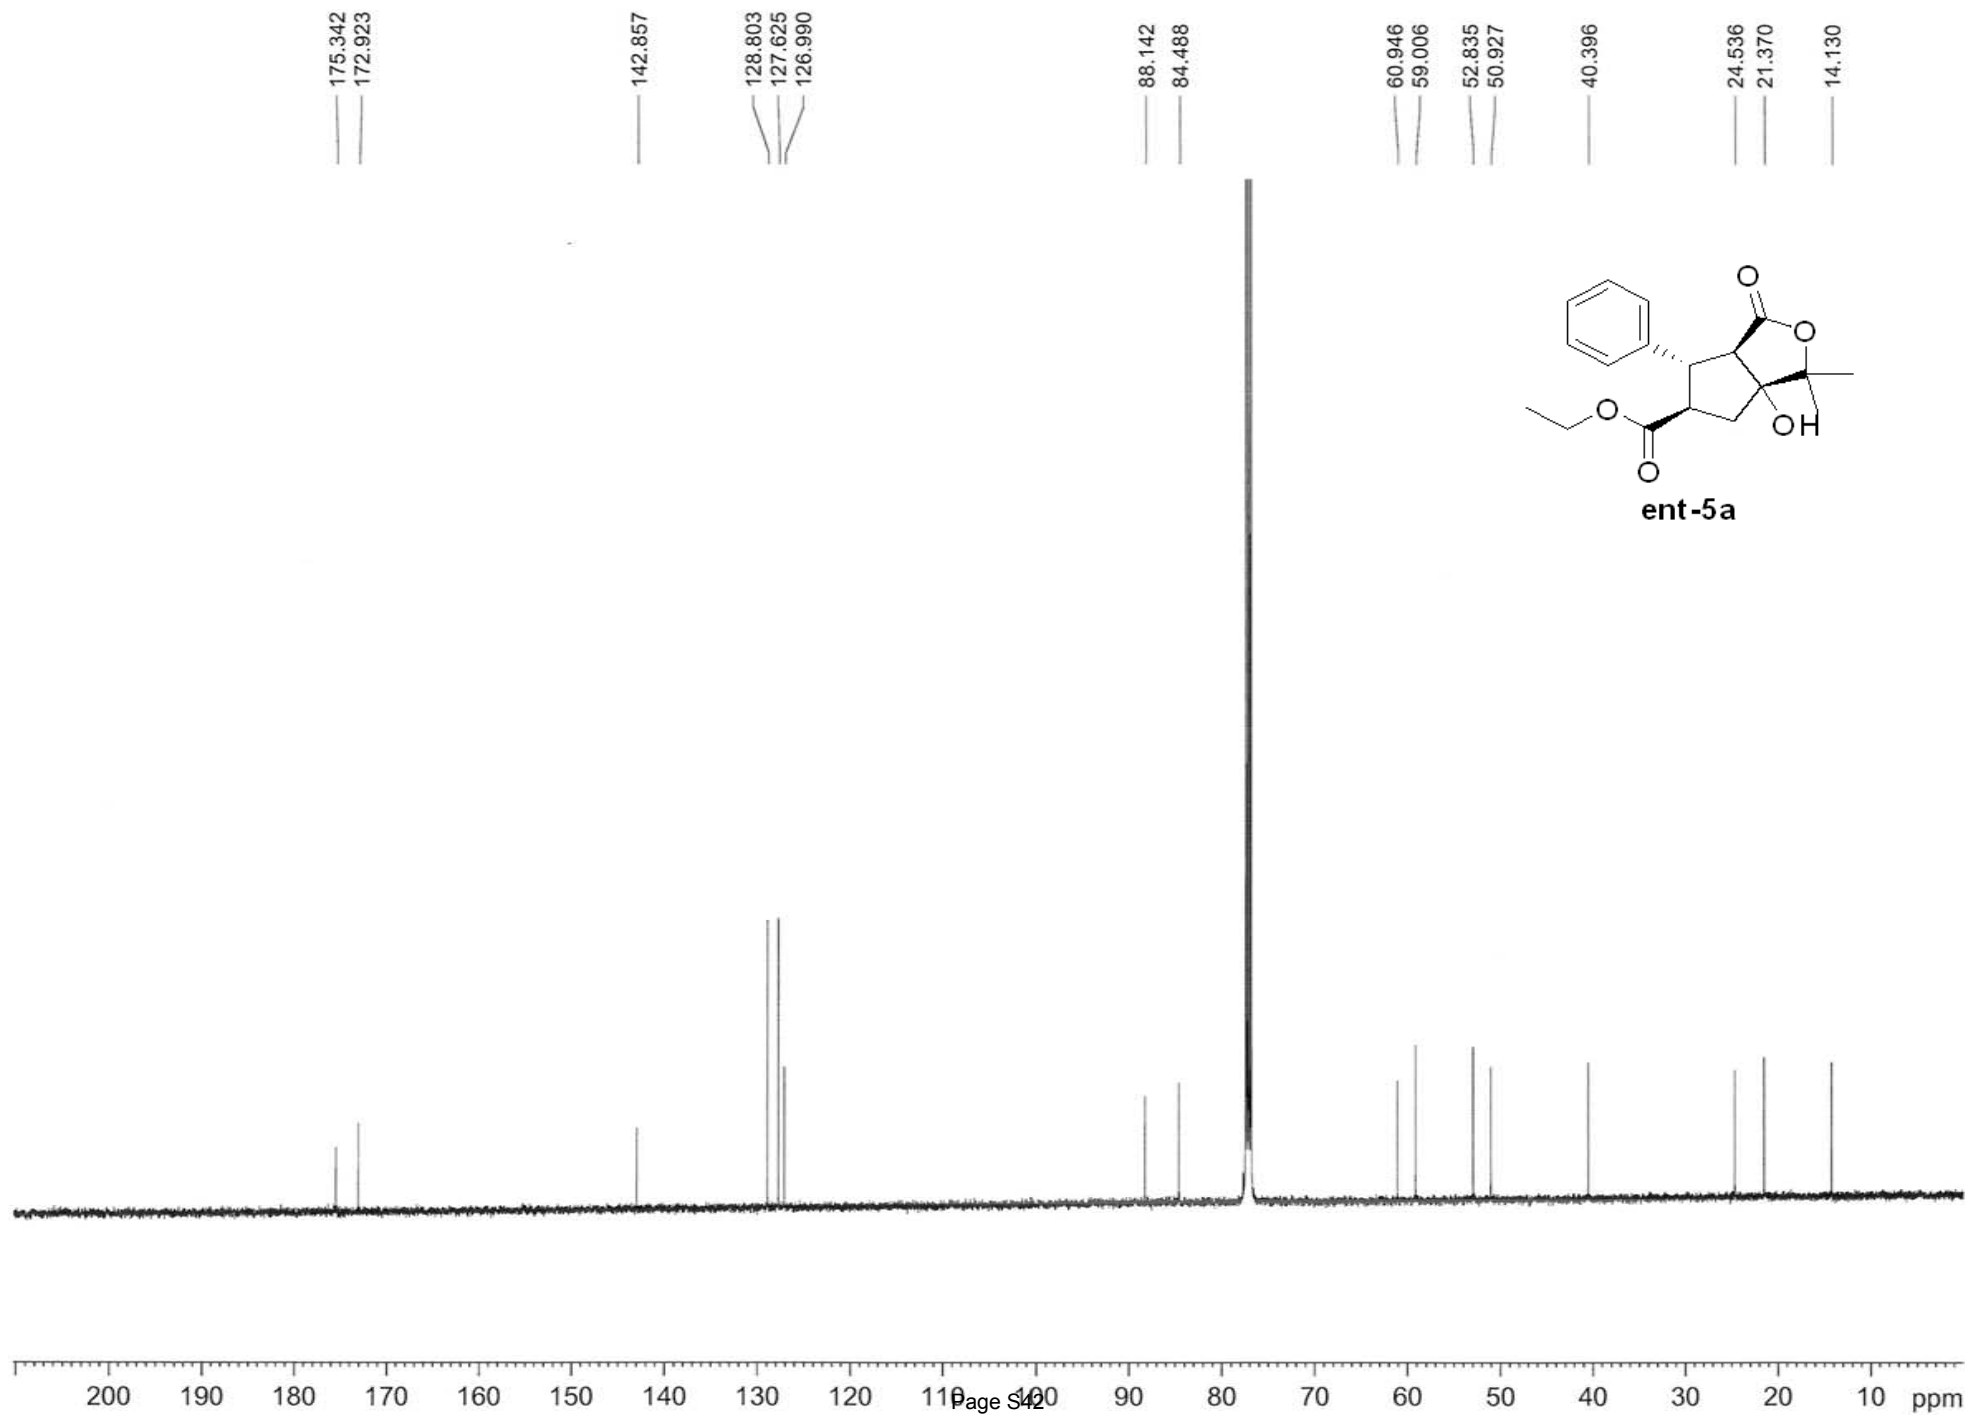

7.436  
7.431  
7.428  
7.418  
7.415  
7.410  
7.260  
7.174  
7.169  
7.165  
7.155  
7.152  
7.147

5.932

4.107  
4.100  
4.086  
4.079  
3.746  
3.732  
3.724  
3.717  
3.710  
3.703  
3.696  
3.682  
3.555  
3.547  
3.544  
3.536  
3.526  
3.523  
3.516  
3.485  
3.471  
3.464  
3.457  
3.449  
3.442  
3.435  
3.421  
3.281  
3.277  
3.274  
2.200  
2.190  
1.547  
1.463  
0.794  
0.779  
0.765

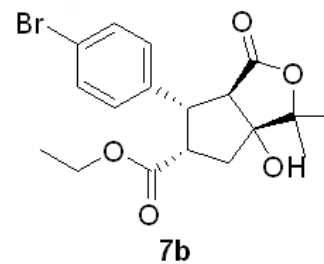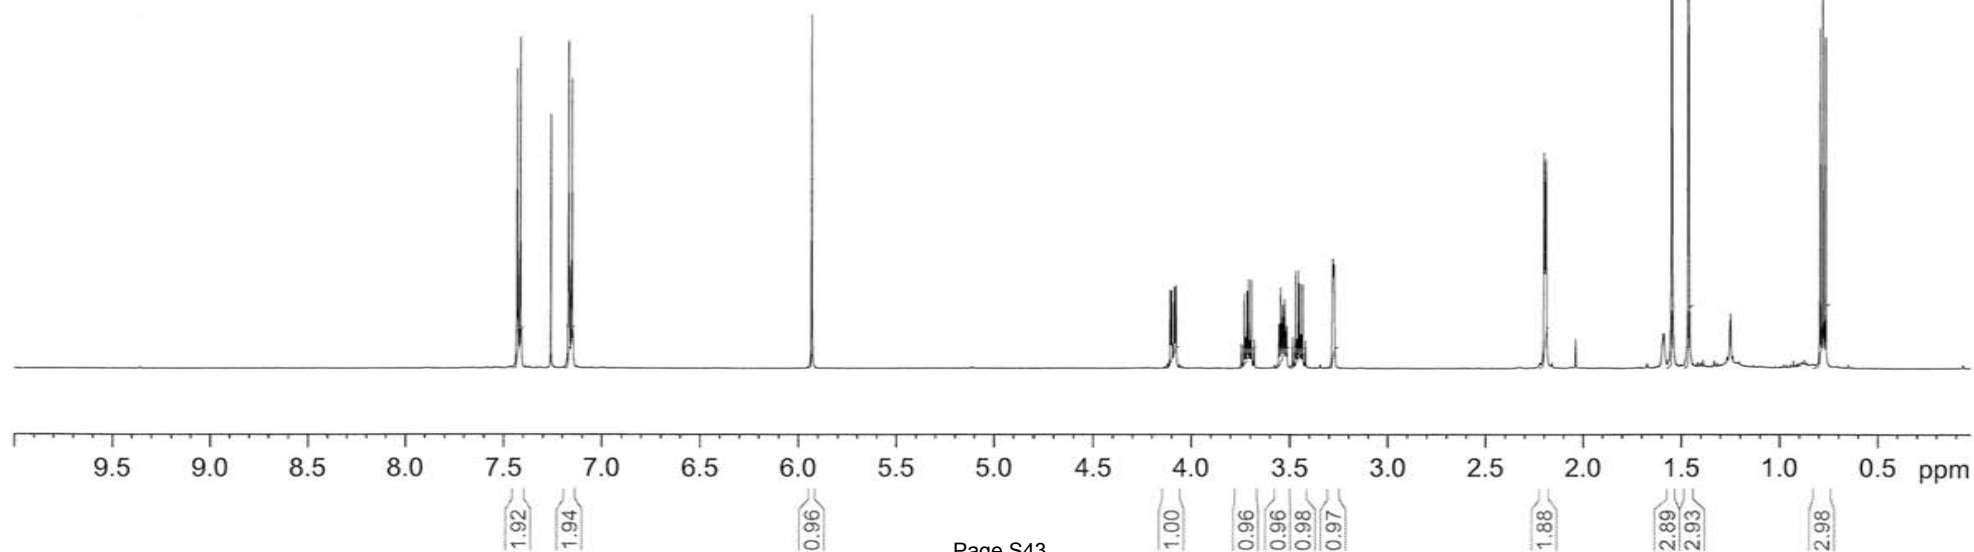

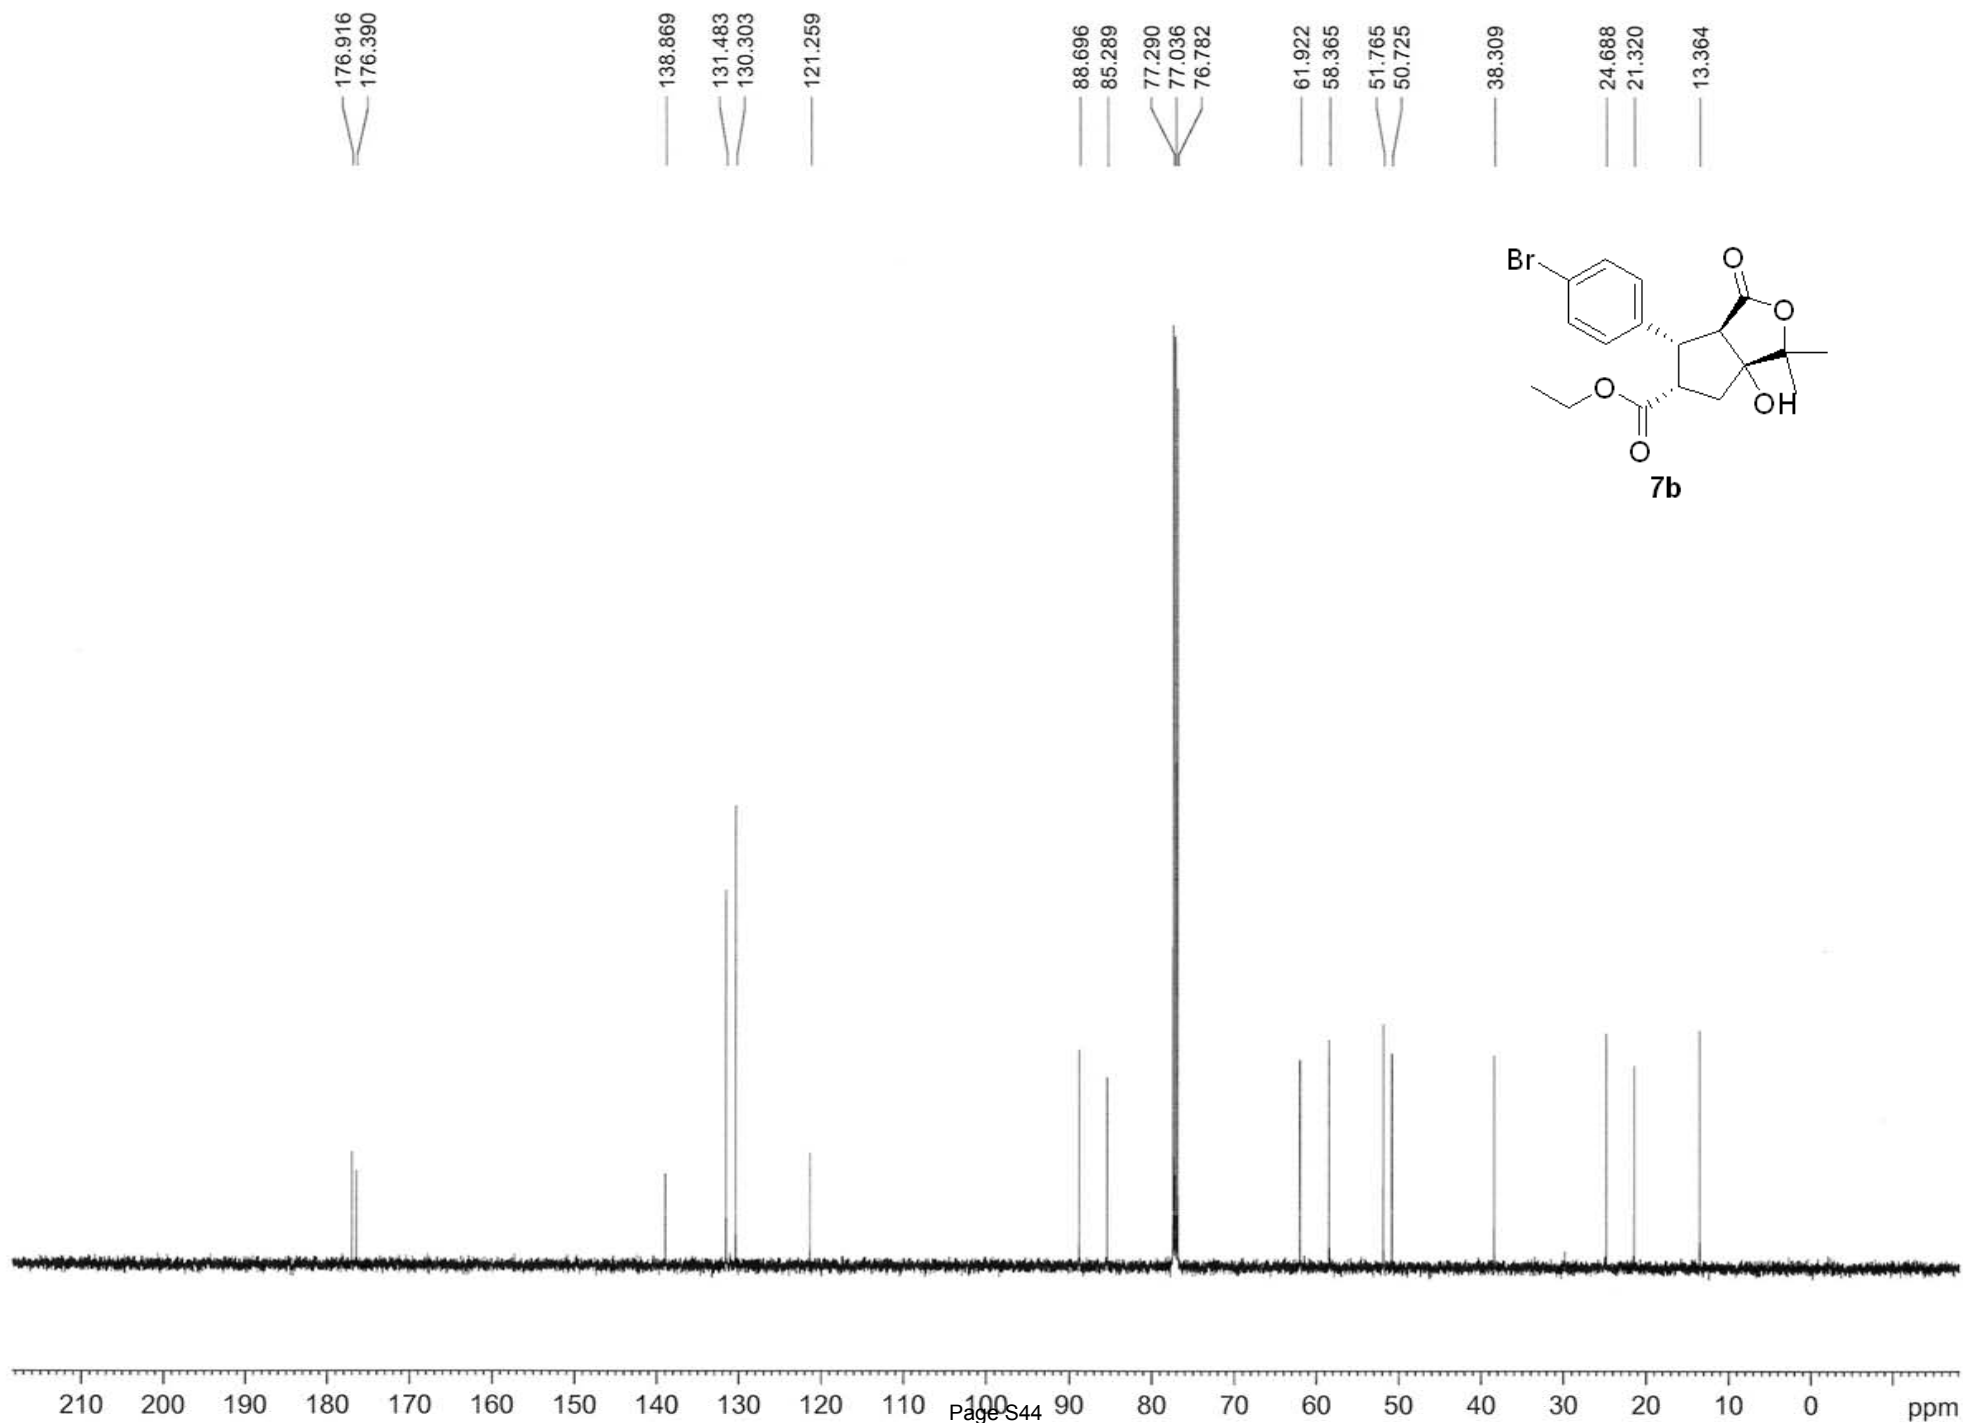

7.483  
7.479  
7.469  
7.466  
7.297  
7.280

4.161  
4.154  
4.147  
4.140  
4.128  
4.126  
4.114  
4.111  
4.107  
4.100  
4.092  
3.795  
3.787  
3.776  
3.767  
3.450  
3.438  
3.430  
3.424  
3.418  
3.412  
3.404  
3.392  
3.050  
3.045  
3.041  
3.036  
2.305  
2.278  
2.252  
2.209  
2.204  
2.196  
2.192  
2.182  
2.177  
2.170  
2.165  
1.620  
1.500  
1.479  
1.231

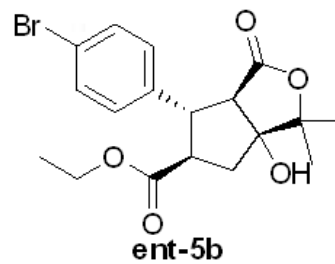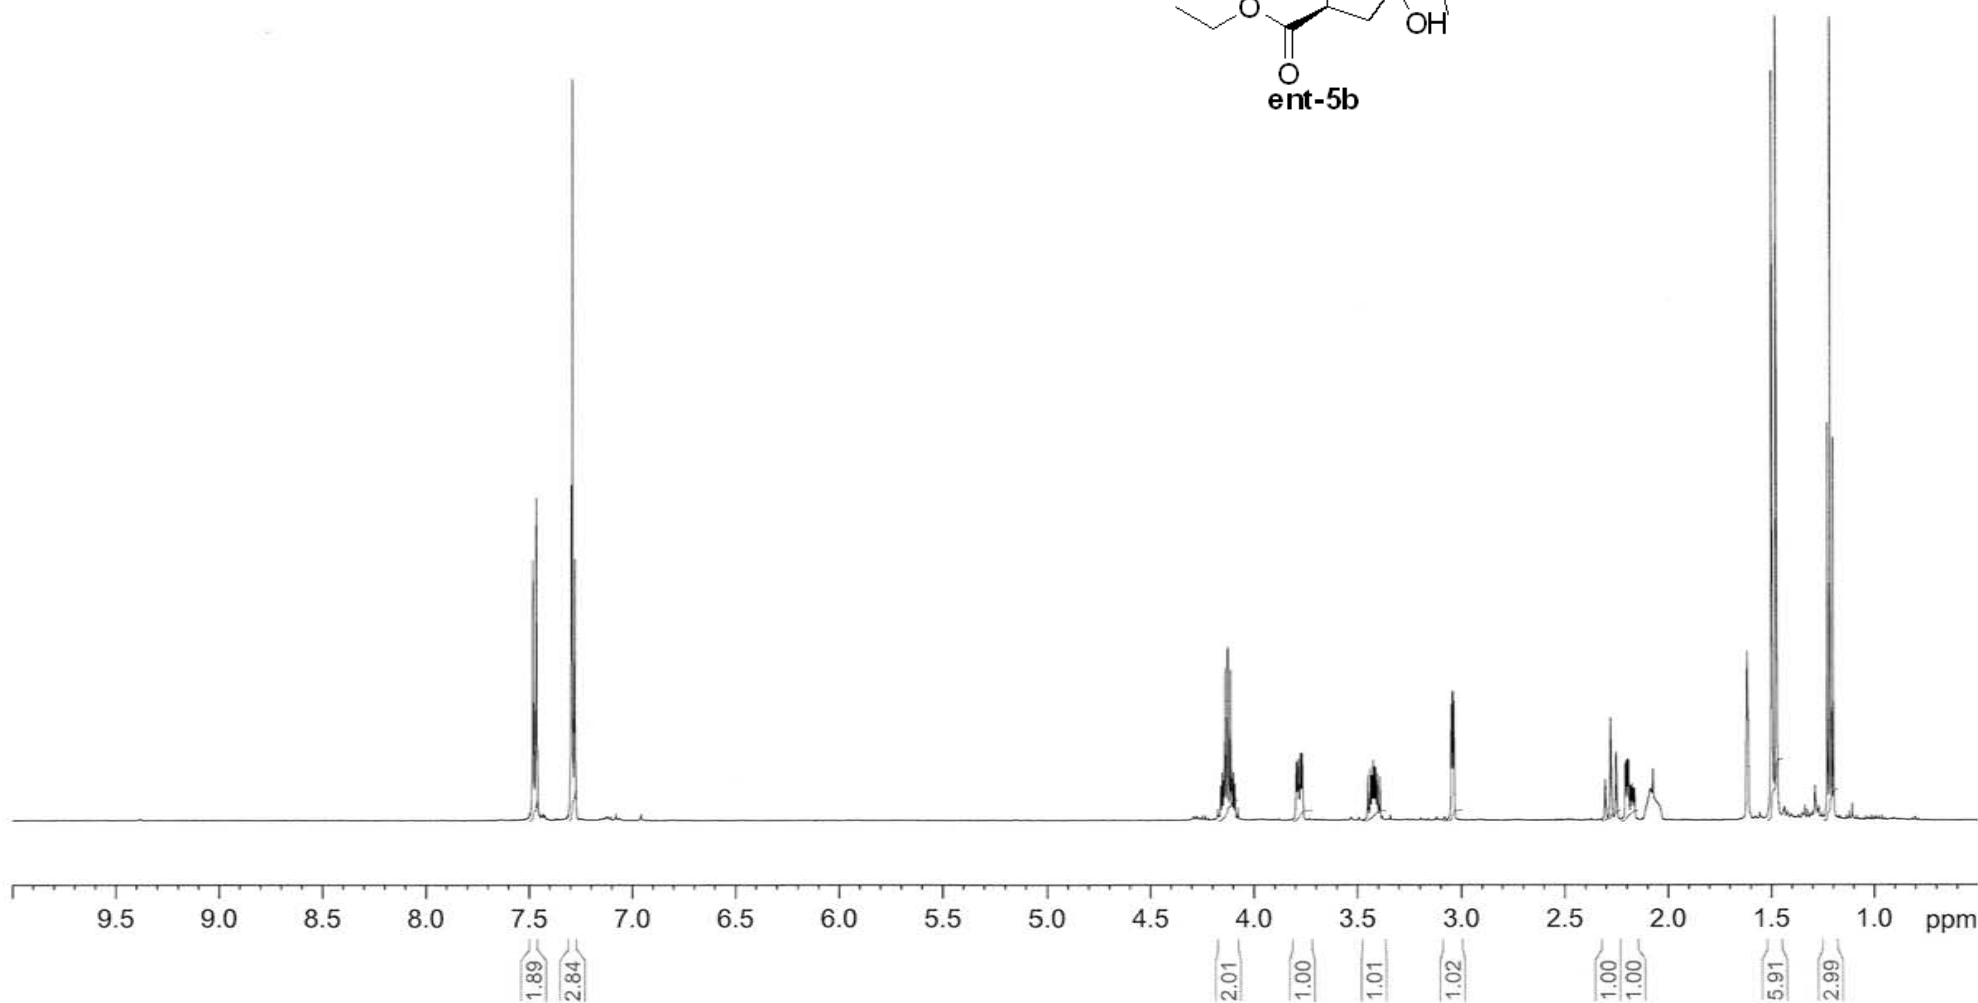

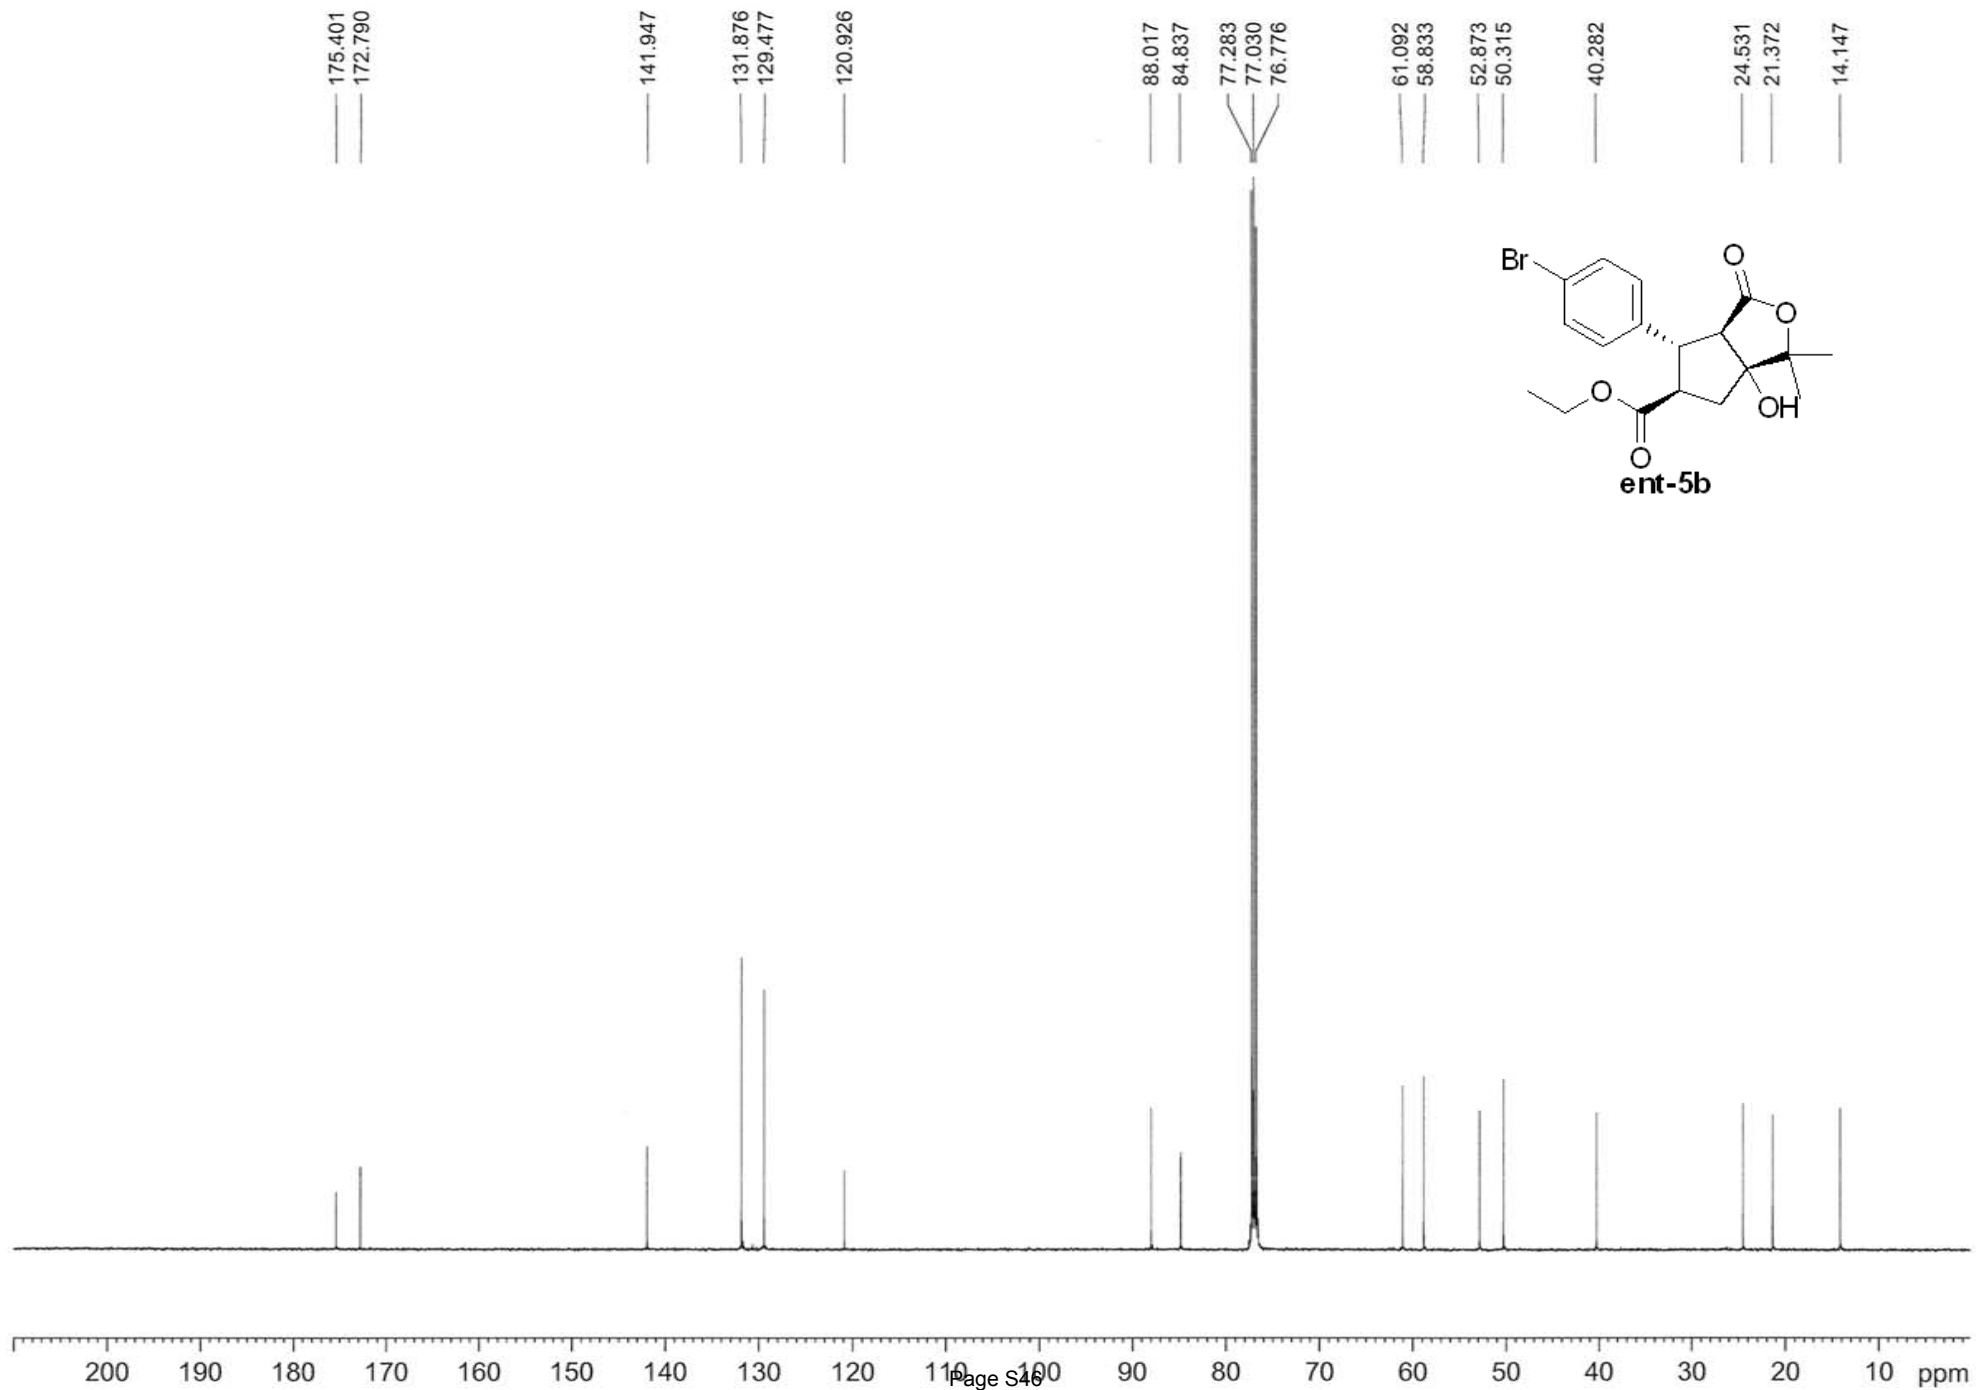

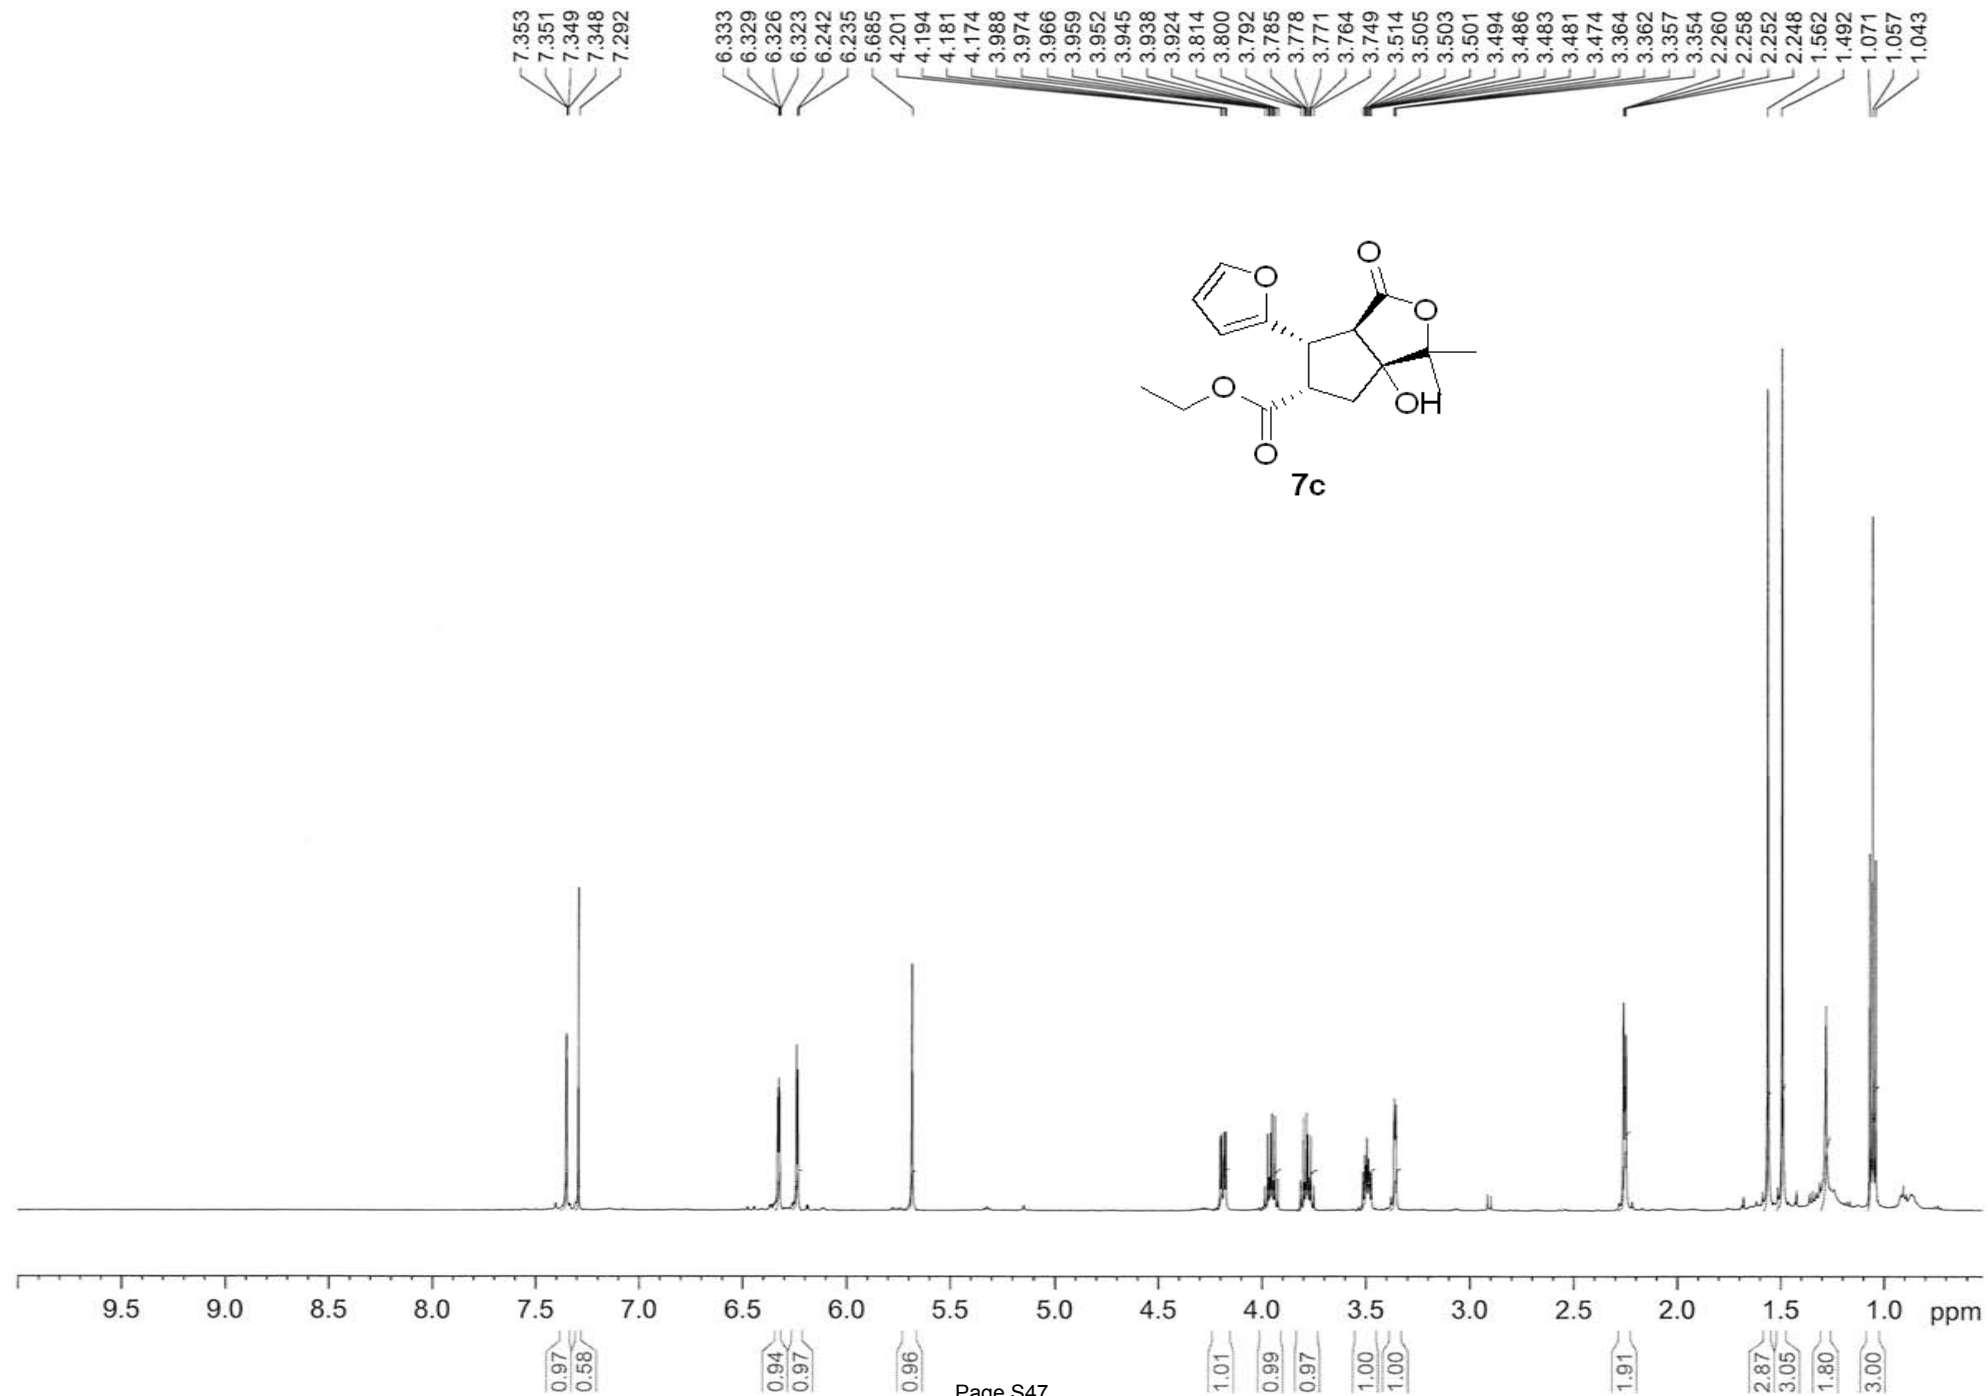

176.322  
176.201

152.991

142.003

110.606  
107.394

88.075  
85.673

62.084  
57.203

49.874  
44.440

38.051

29.715

24.929

21.525

13.724

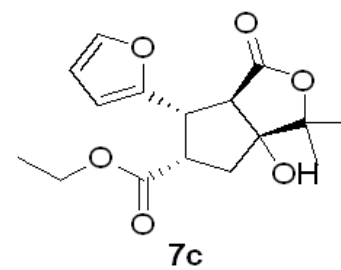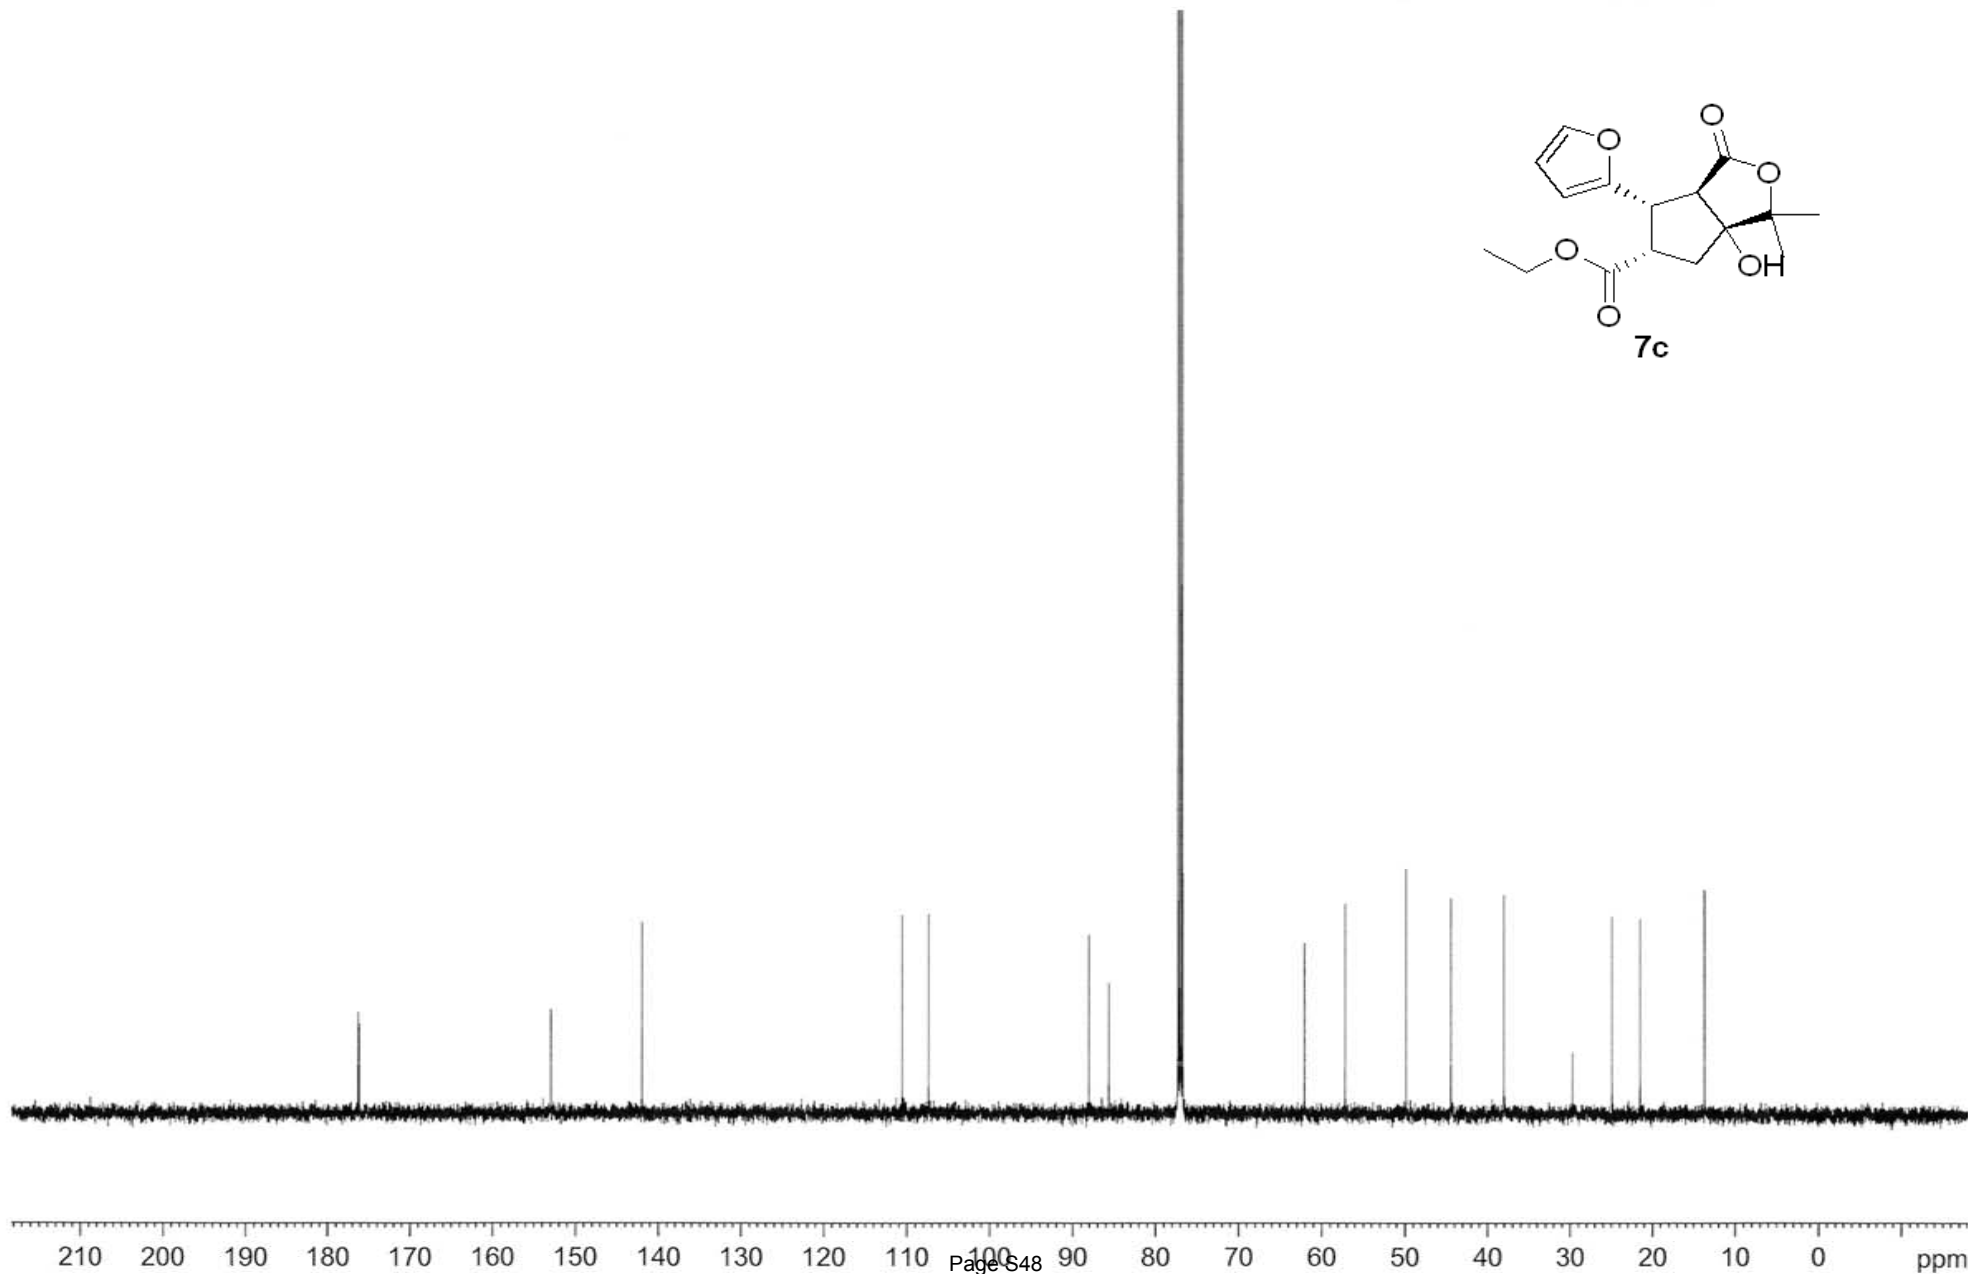



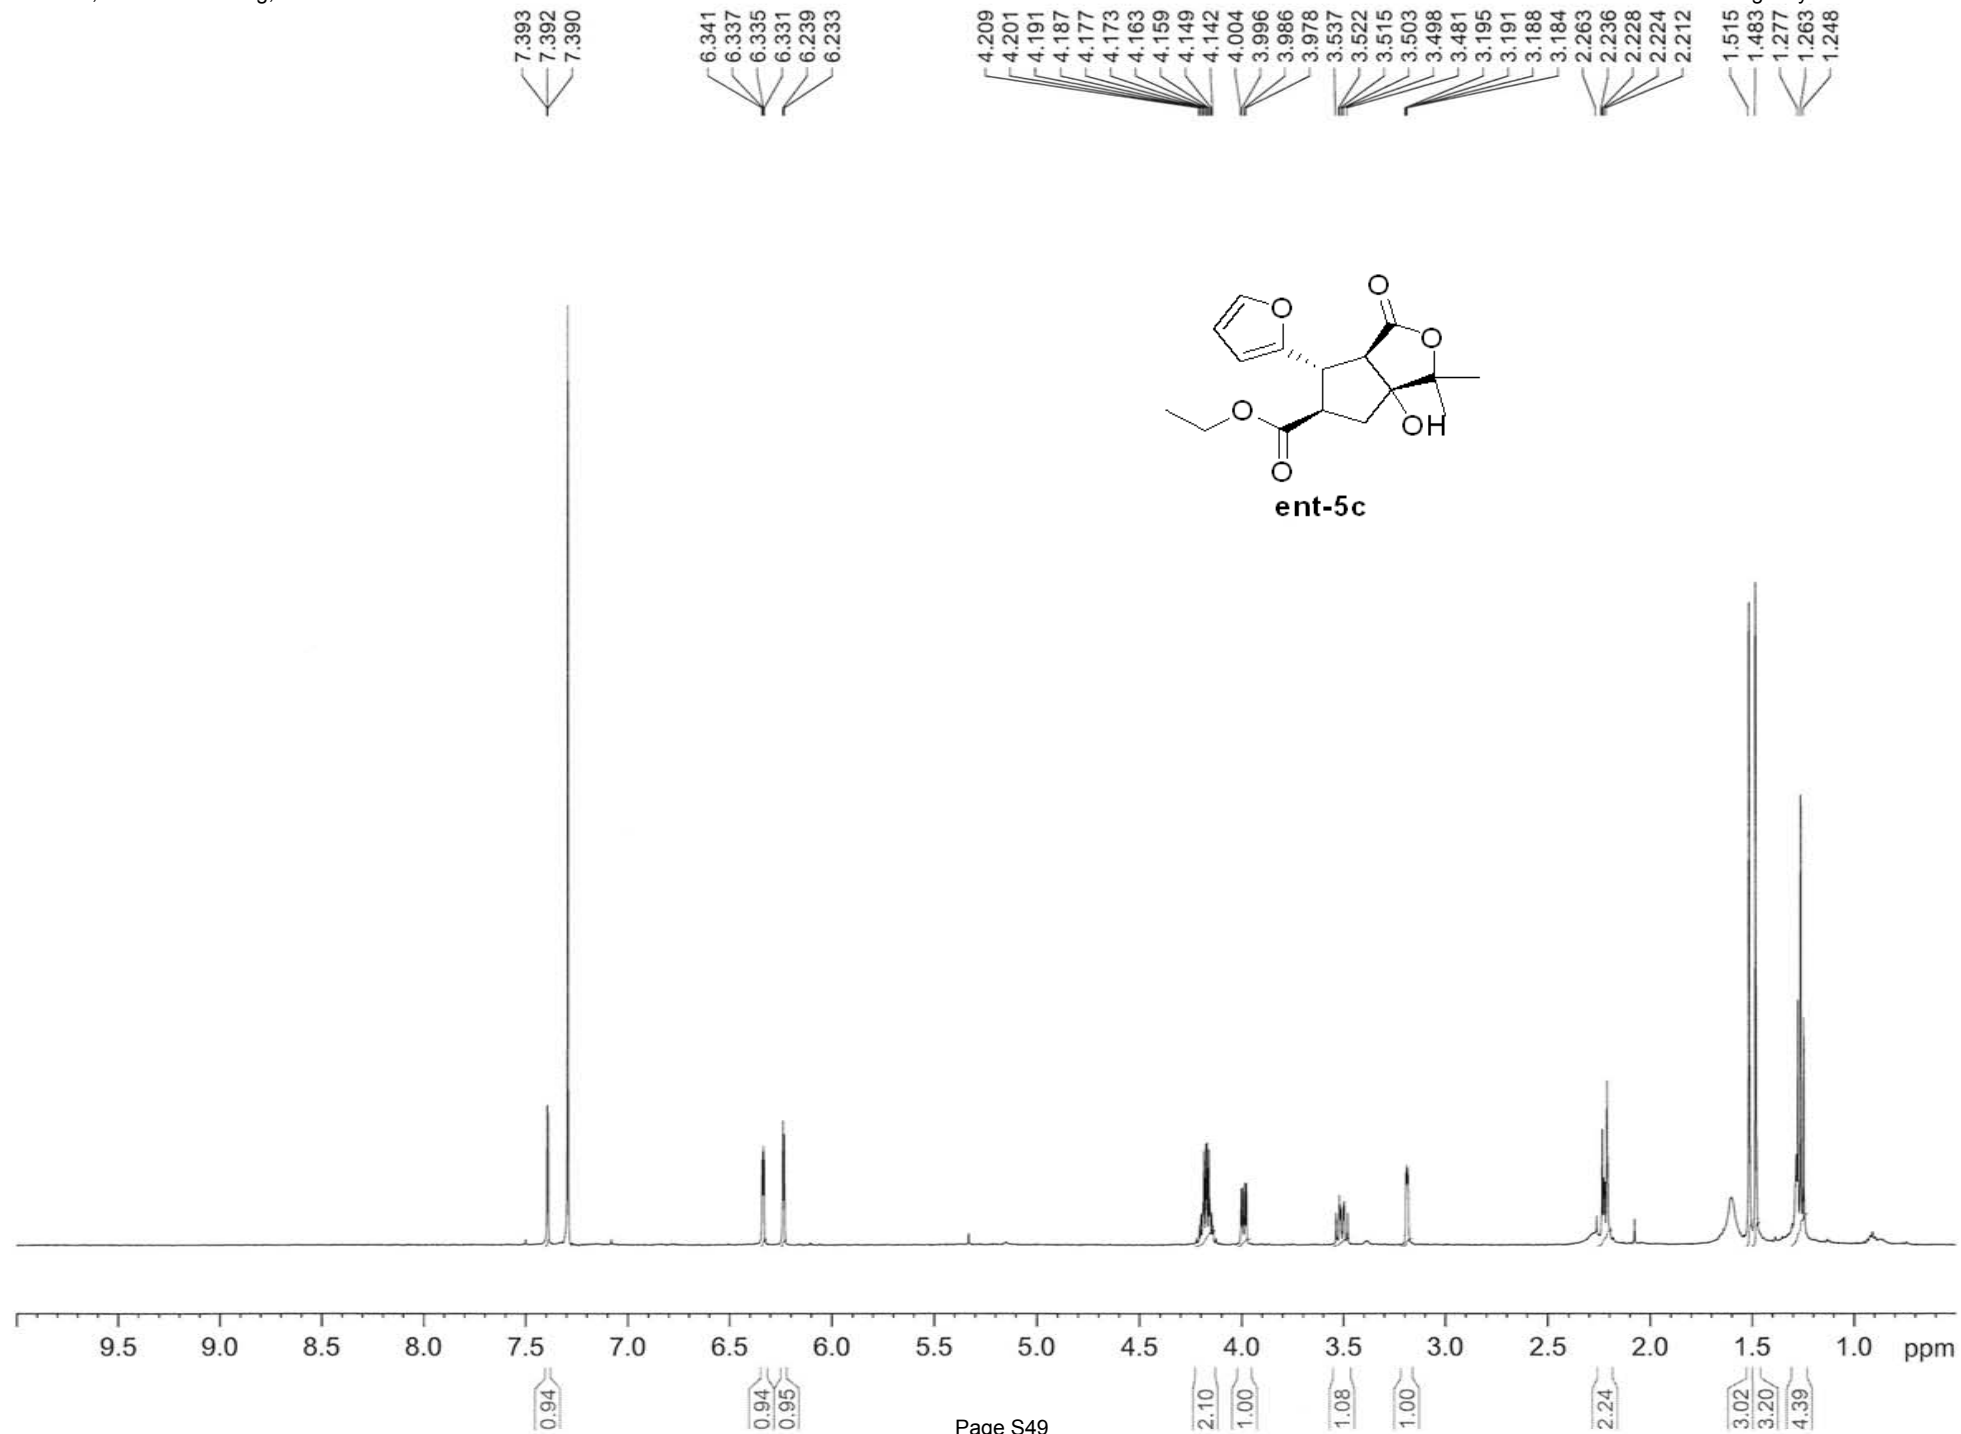

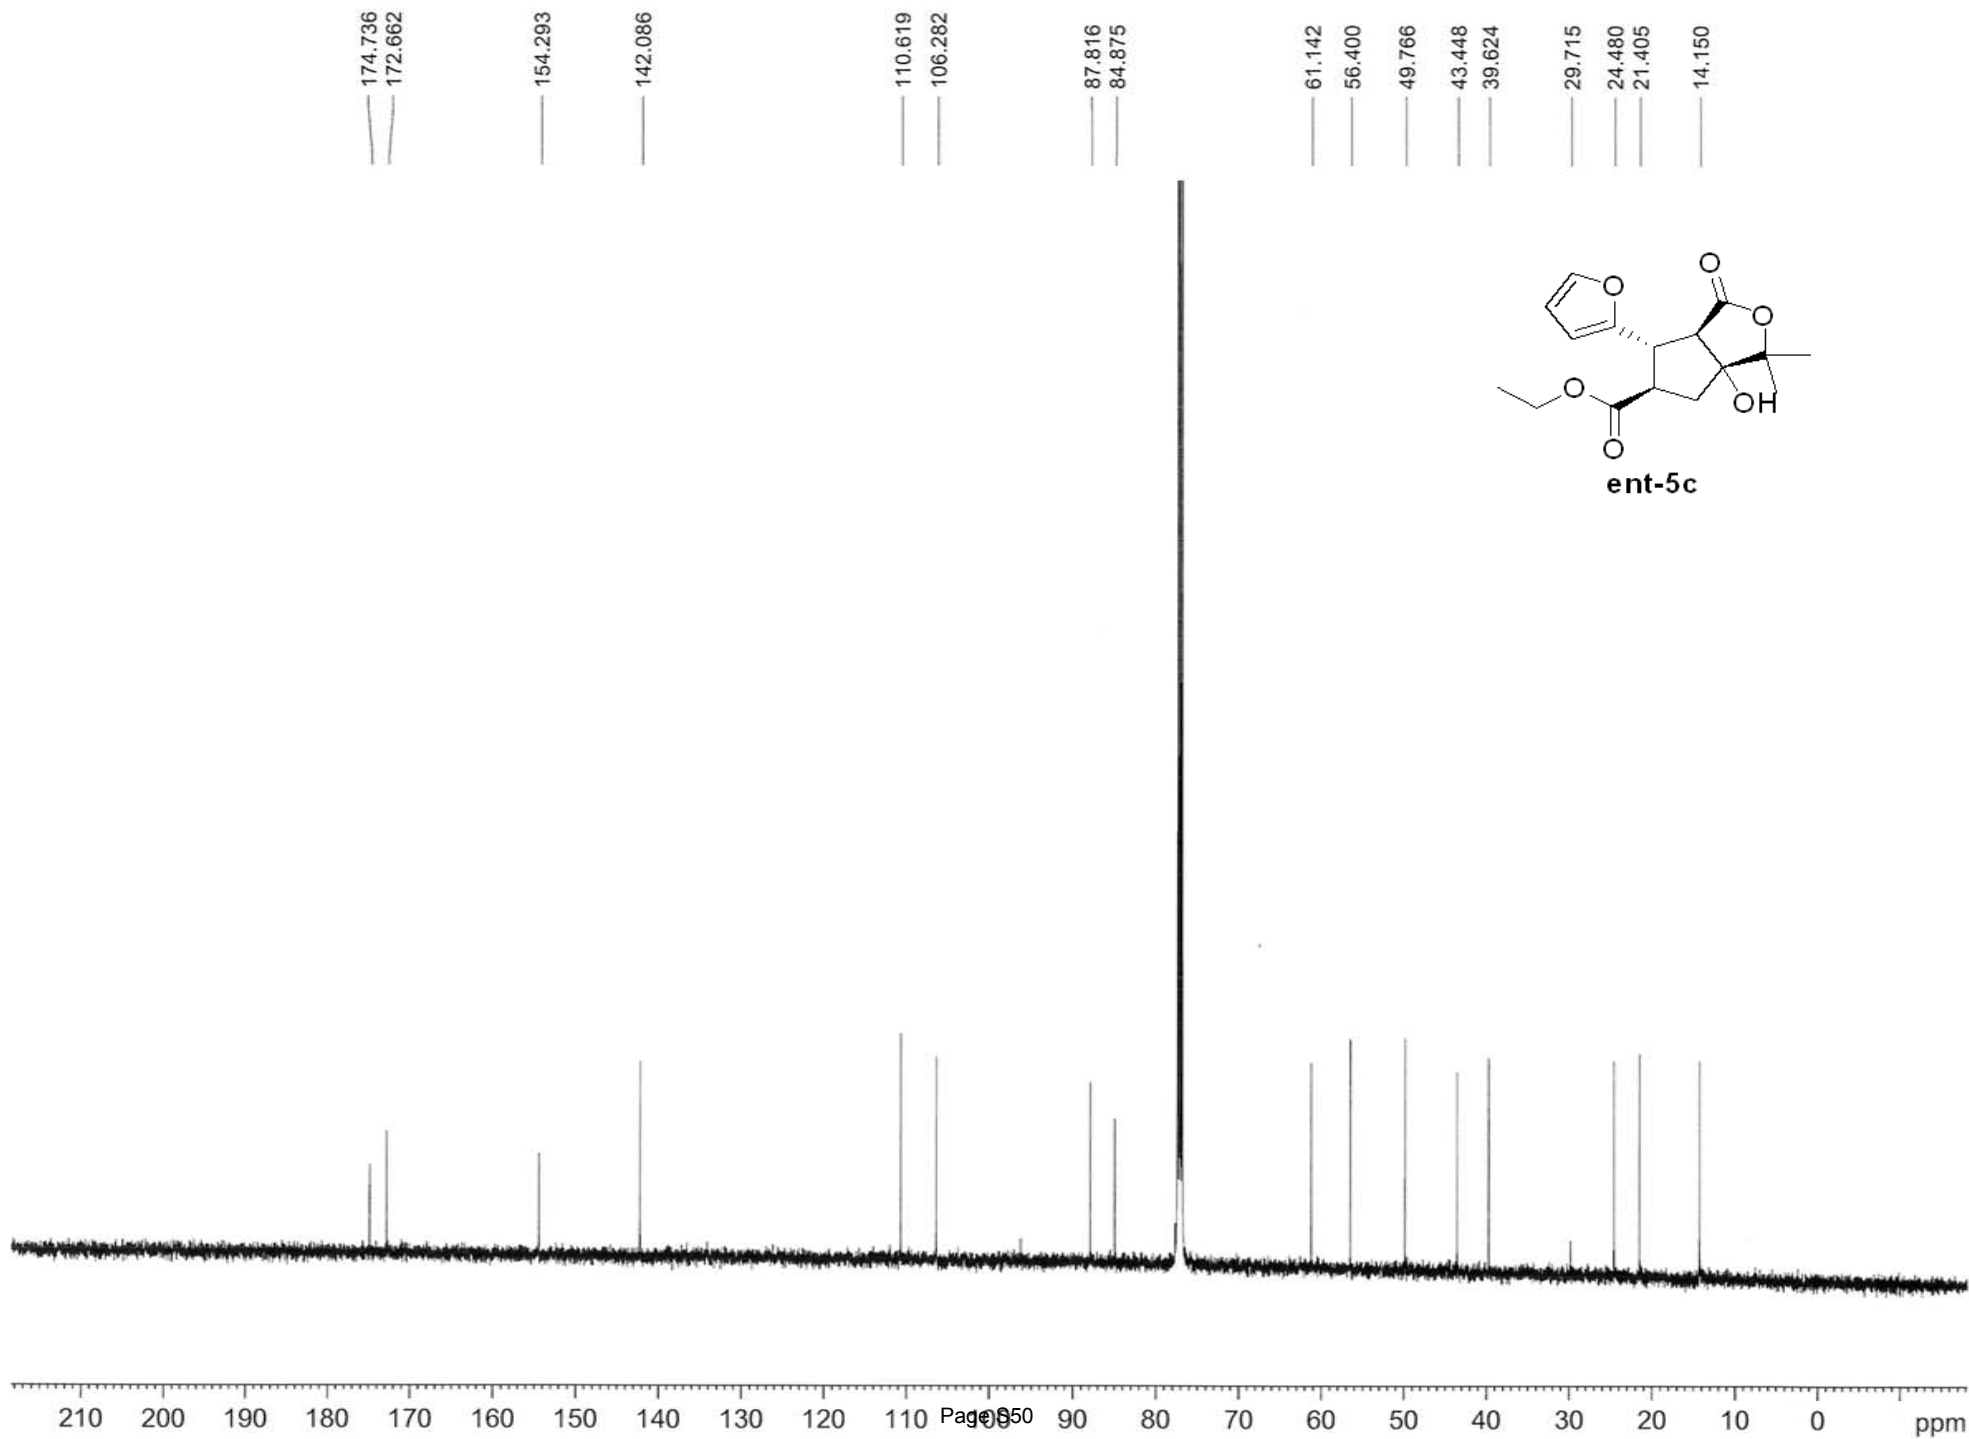

7.292  
7.193  
7.189  
7.185  
7.180  
6.961  
6.957  
6.953  
6.946

5.989  
4.393  
4.386  
4.373  
4.365  
3.883  
3.869  
3.862  
3.855  
3.848  
3.841  
3.833  
3.819  
3.676  
3.661  
3.654  
3.647  
3.640  
3.633  
3.626  
3.611  
3.591  
3.584  
3.579  
3.577  
3.571  
3.564  
3.559  
3.557  
3.552  
3.408  
3.405  
3.400  
3.397  
2.244  
2.237  
2.232  
1.575  
1.489  
0.950  
0.935  
0.921

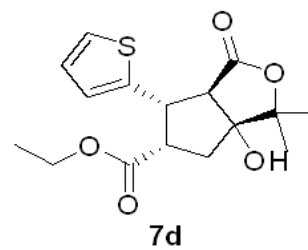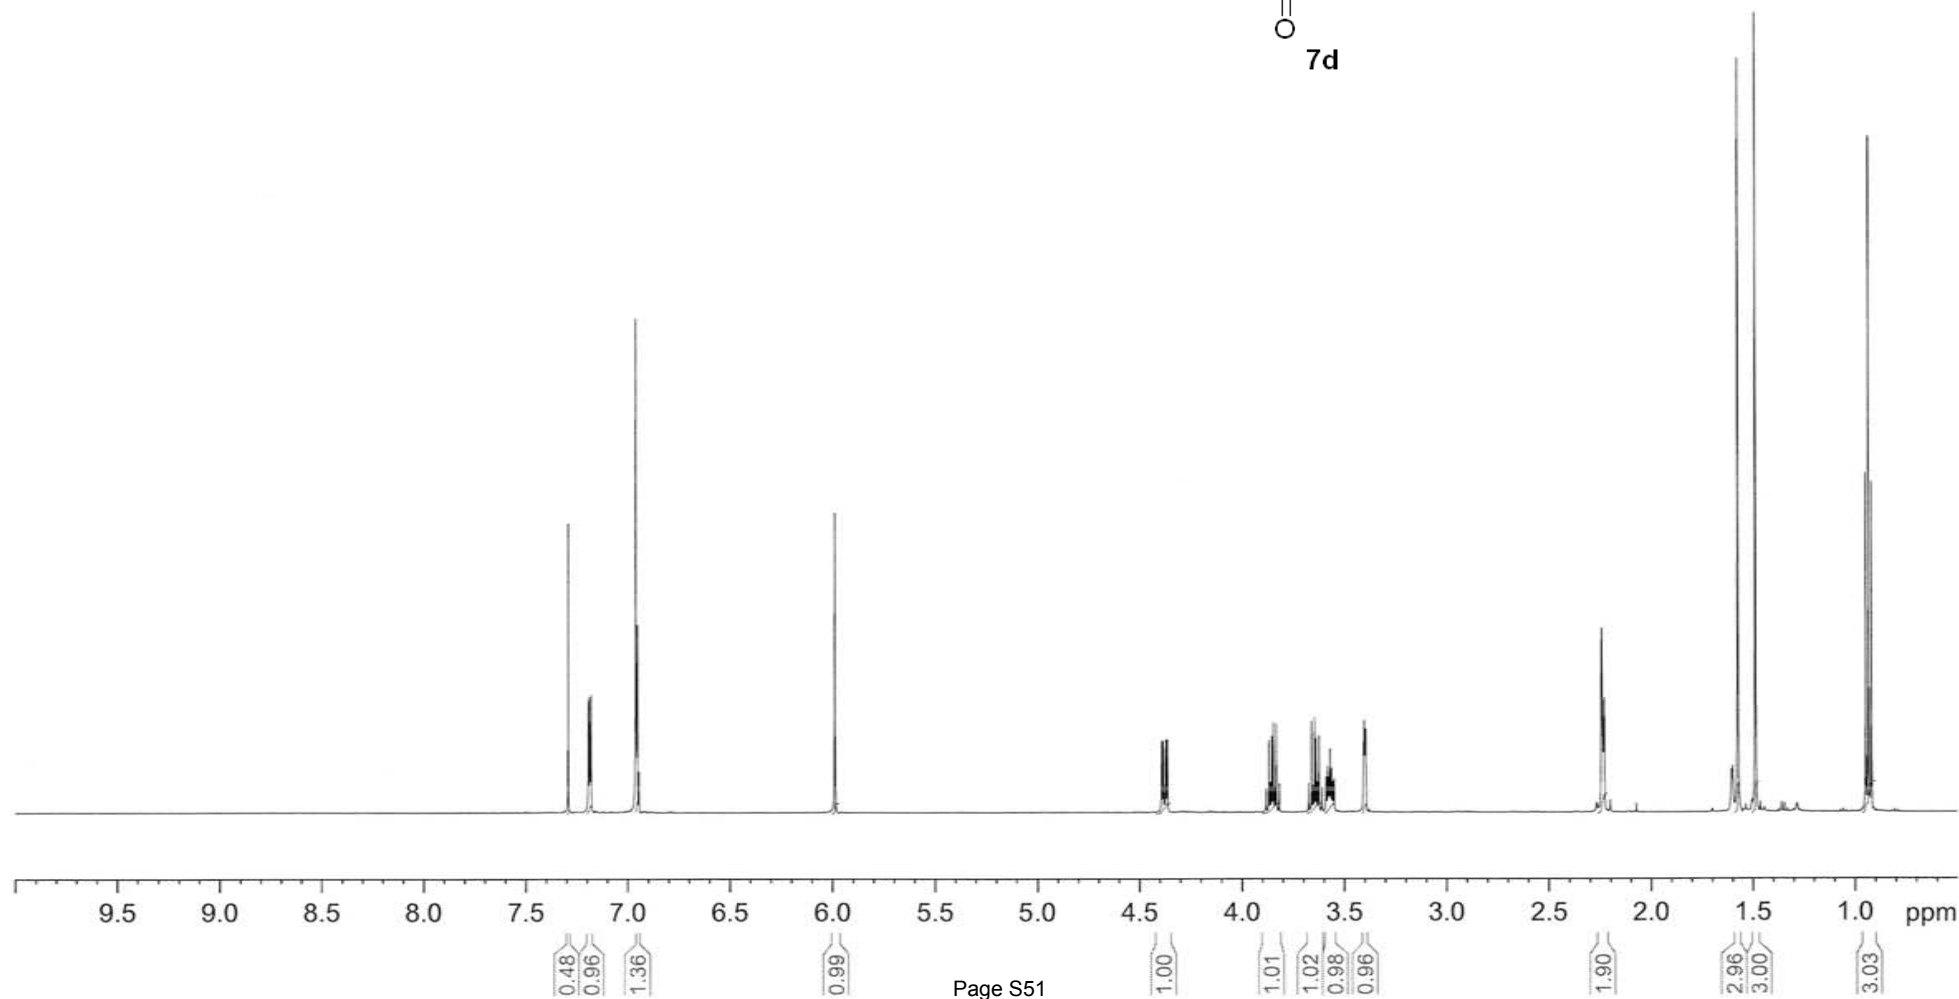

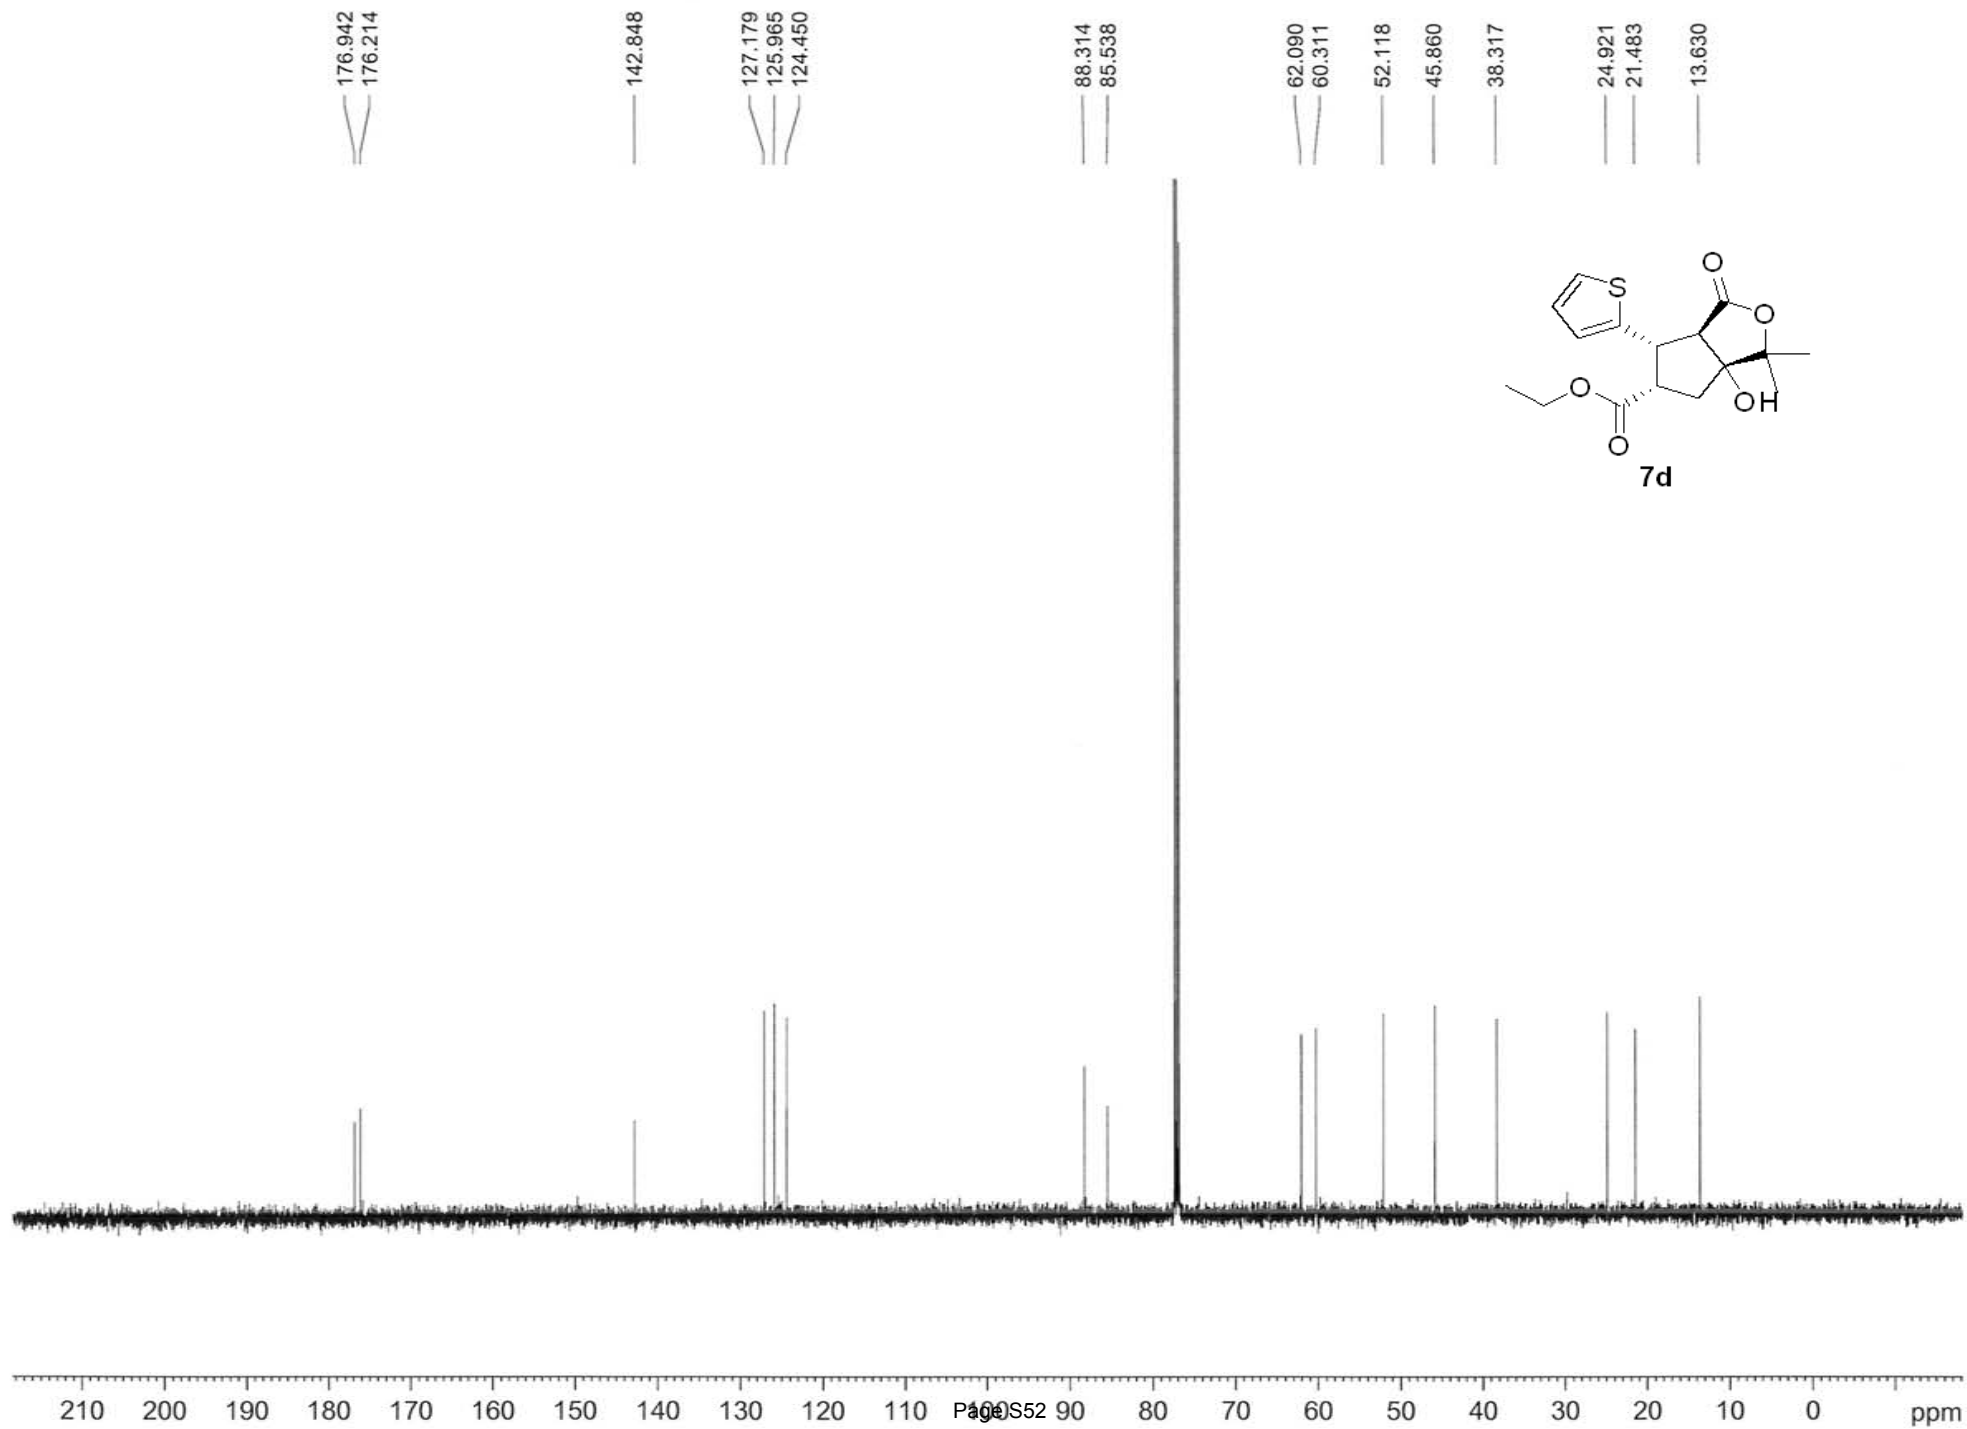

7.269  
7.187  
7.177  
6.997  
6.991  
6.939  
6.932  
6.929  
6.922

4.170  
4.163  
4.155  
4.149  
4.141  
4.135  
4.127  
4.121  
4.114  
3.540  
3.526  
3.521  
3.516  
3.507  
3.502  
3.497  
3.483  
3.130  
3.125  
3.121  
3.117  
2.244  
2.218  
2.200  
2.195  
2.187  
2.183  
2.174  
2.169  
2.160  
2.156  
1.475  
1.442  
1.244  
1.230  
1.216

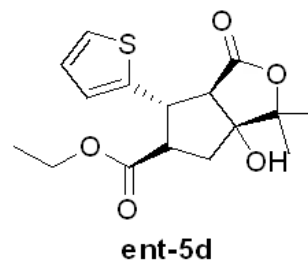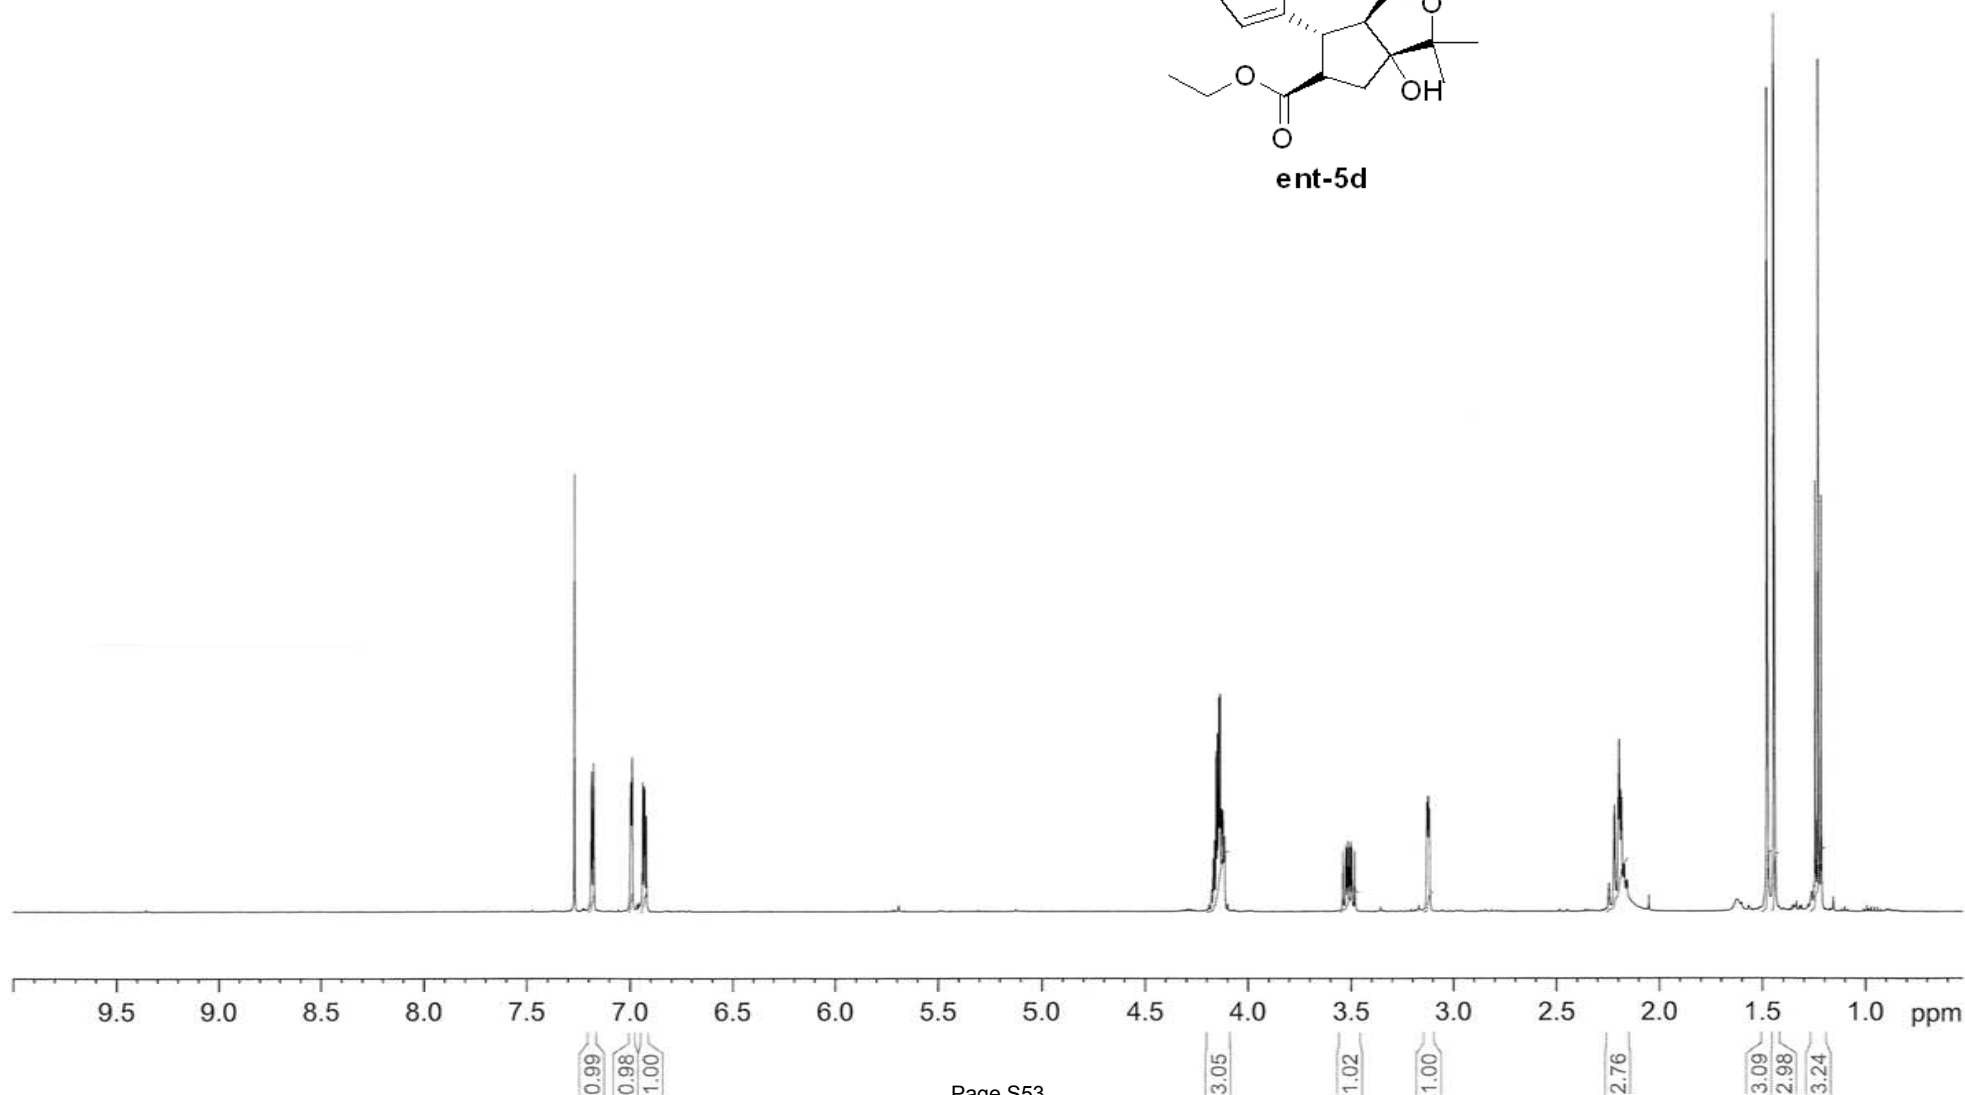

174.995  
172.746

146.380

127.117  
124.775  
124.262

87.947  
84.831

61.177  
59.642

53.392

45.716

40.113

24.501  
21.332

14.150

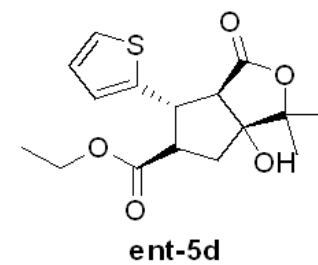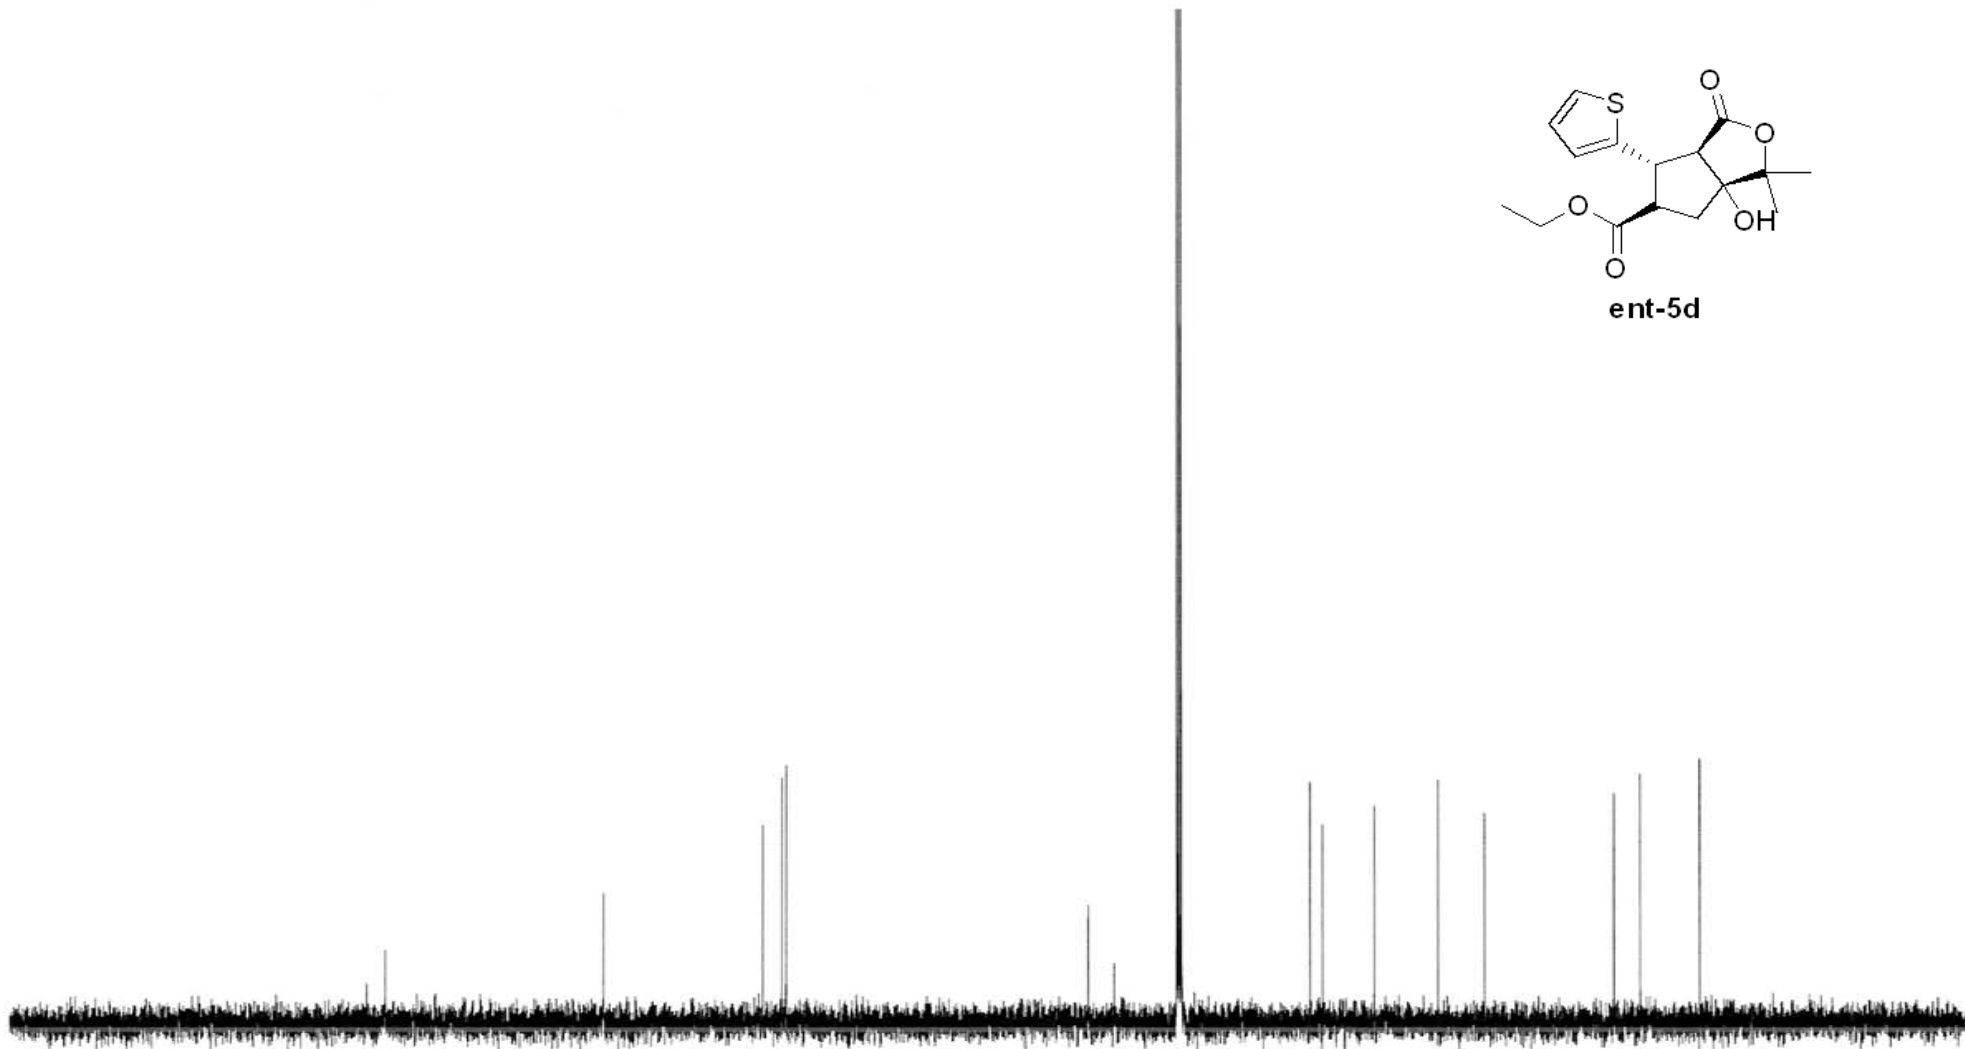

|    | FREQUENCY | PPM   | HEIGHT |
|----|-----------|-------|--------|
| 1  | 2986.706  | 7.468 | 12.0   |
| 2  | 2971.197  | 7.429 | 14.2   |
| 3  | 2907.627  | 7.270 | 70.6   |
| 4  | 2782.174  | 6.956 | 12.5   |
| 5  | 2766.512  | 6.917 | 11.0   |
| 6  | 1728.192  | 4.321 | 5.8    |
| 7  | 1721.128  | 4.303 | 18.7   |
| 8  | 1713.911  | 4.285 | 19.0   |
| 9  | 1706.848  | 4.268 | 6.3    |
| 10 | 1423.851  | 3.560 | 14.2   |
| 11 | 625.994   | 1.565 | 8.1    |
| 12 | 578.085   | 1.445 | 151.2  |
| 13 | 545.686   | 1.364 | 19.4   |
| 14 | 538.469   | 1.346 | 40.0   |
| 15 | 531.405   | 1.329 | 19.2   |

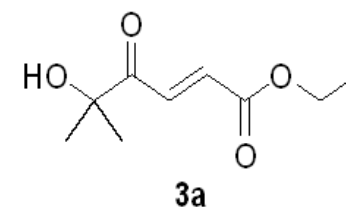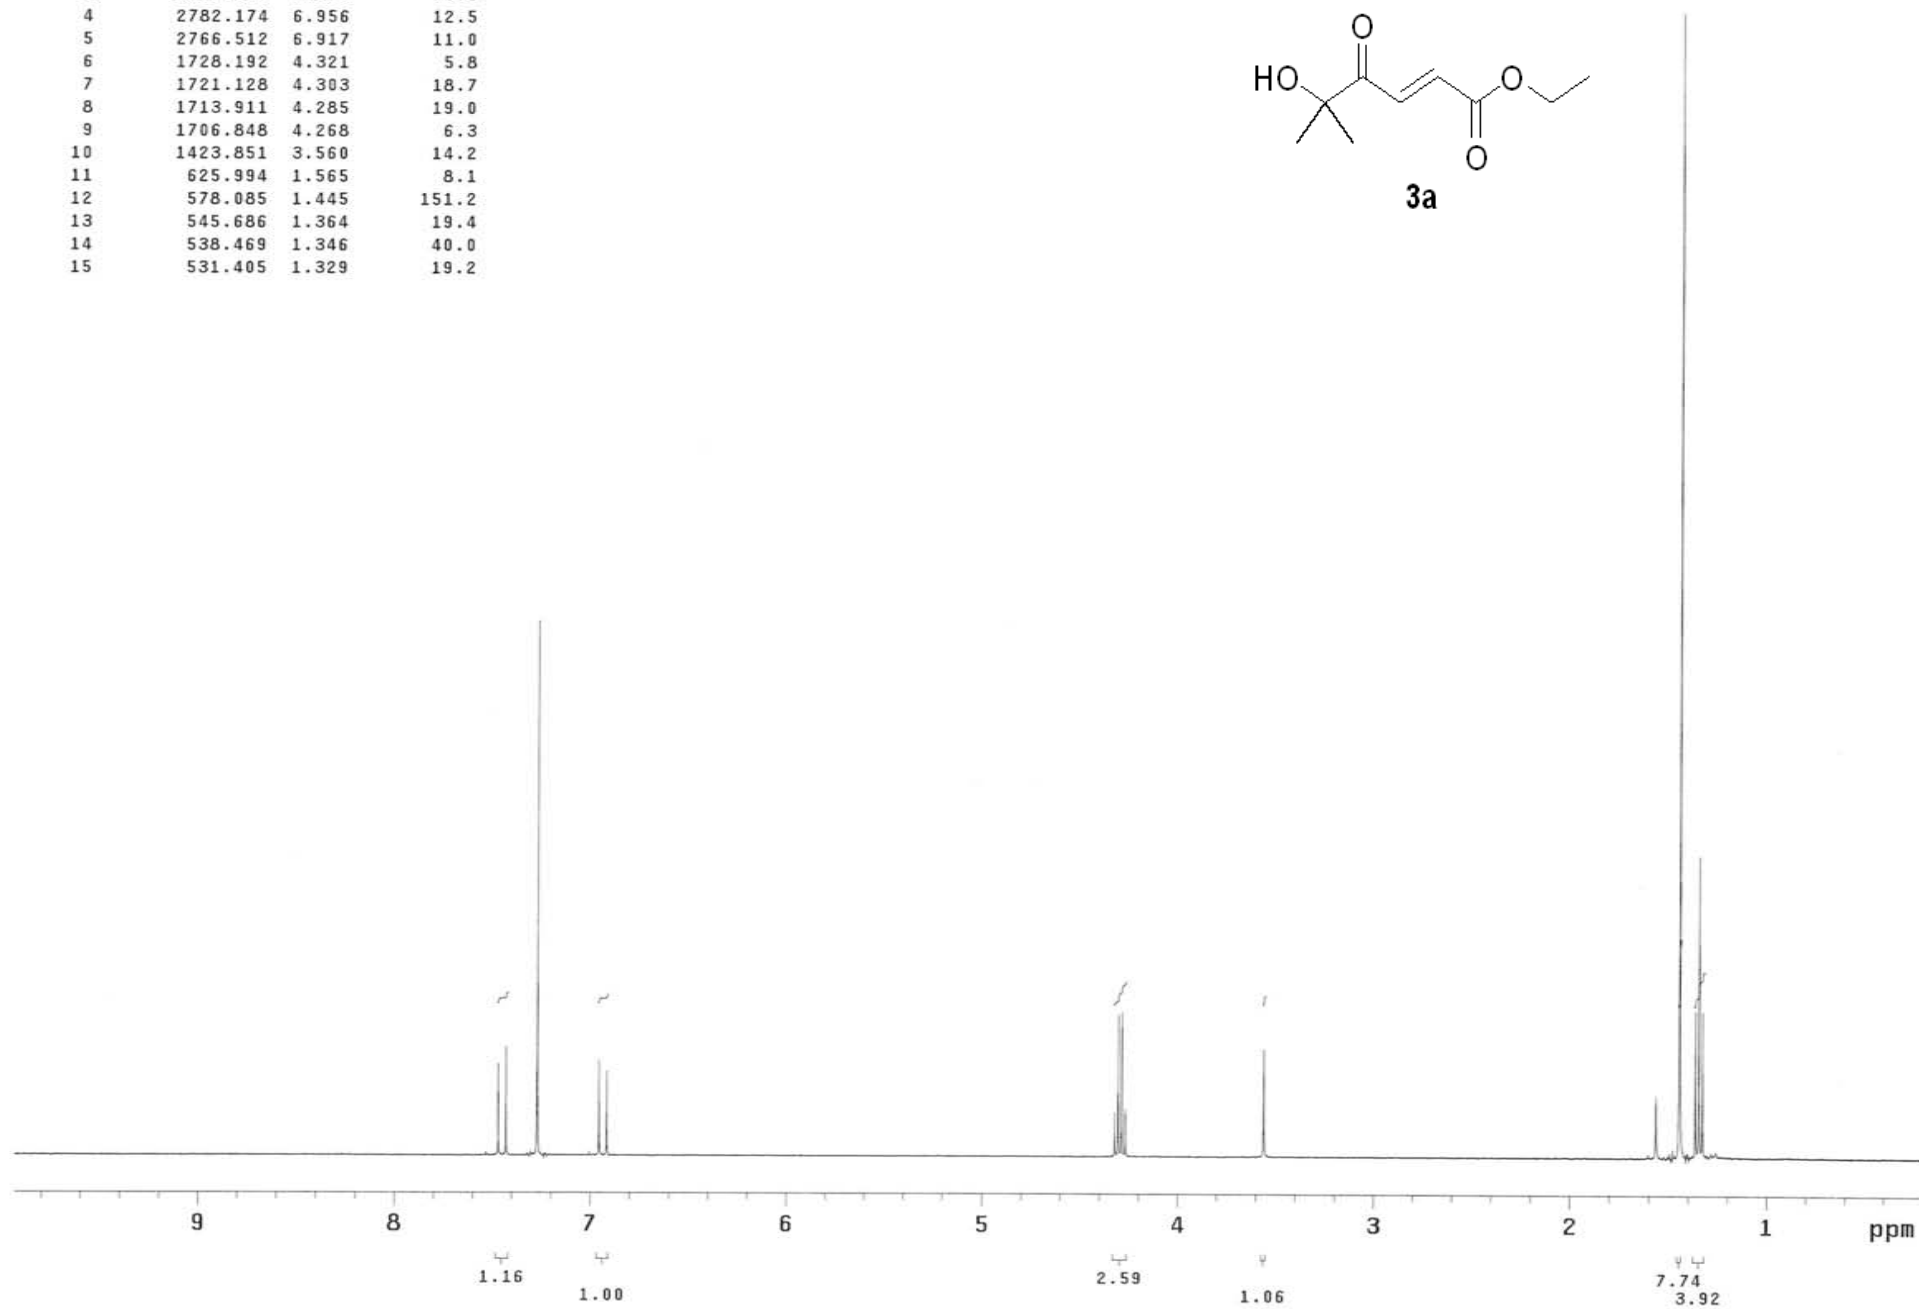

Bode, J. & Kaebamrungsri, S.

| PEAK | FREQUENCY | PPM     | HEIGHT |
|------|-----------|---------|--------|
| 1    | 20350.346 | 202.356 | 10.7   |
| 2    | 16624.799 | 165.310 | 12.2   |
| 3    | 13437.903 | 133.621 | 41.1   |
| 4    | 13410.437 | 133.348 | 37.7   |
| 5    | 7798.846  | 77.549  | 30.5   |
| 6    | 7766.801  | 77.230  | 31.8   |
| 7    | 7734.757  | 76.911  | 31.3   |
| 8    | 7663.038  | 76.198  | 15.9   |
| 9    | 6208.831  | 61.738  | 33.8   |
| 10   | 2620.618  | 26.058  | 80.9   |
| 11   | 1436.500  | 14.284  | 33.3   |

"Stereodivergency of Triazolium..."

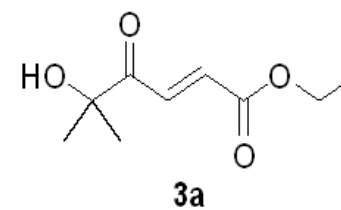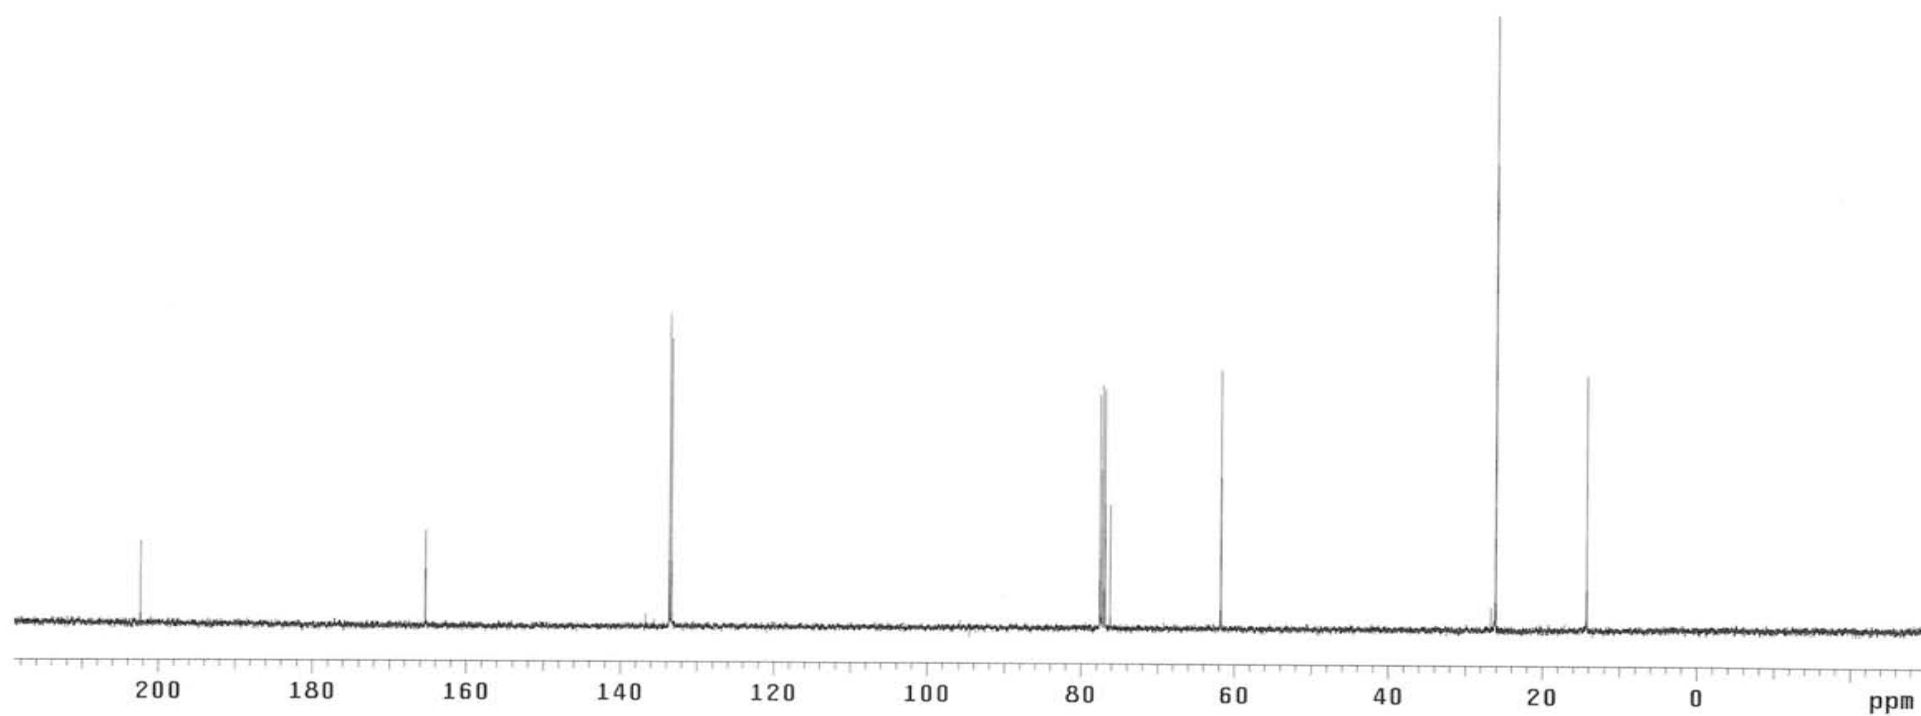



| NO | FREQUENCY | PPM   | HEIGHT |
|----|-----------|-------|--------|
| 1  | 2990.123  | 7.476 | 11.2   |
| 2  | 2974.614  | 7.437 | 13.3   |
| 3  | 2904.748  | 7.263 | 36.9   |
| 4  | 2779.756  | 6.950 | 12.8   |
| 5  | 2764.247  | 6.912 | 11.2   |
| 6  | 1533.987  | 3.835 | 86.8   |
| 7  | 1415.751  | 3.540 | 14.9   |
| 8  | 631.560   | 1.579 | 26.2   |
| 9  | 574.285   | 1.436 | 151.2  |

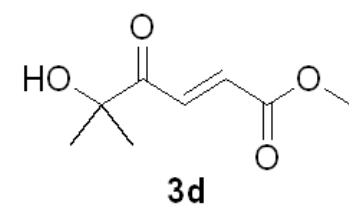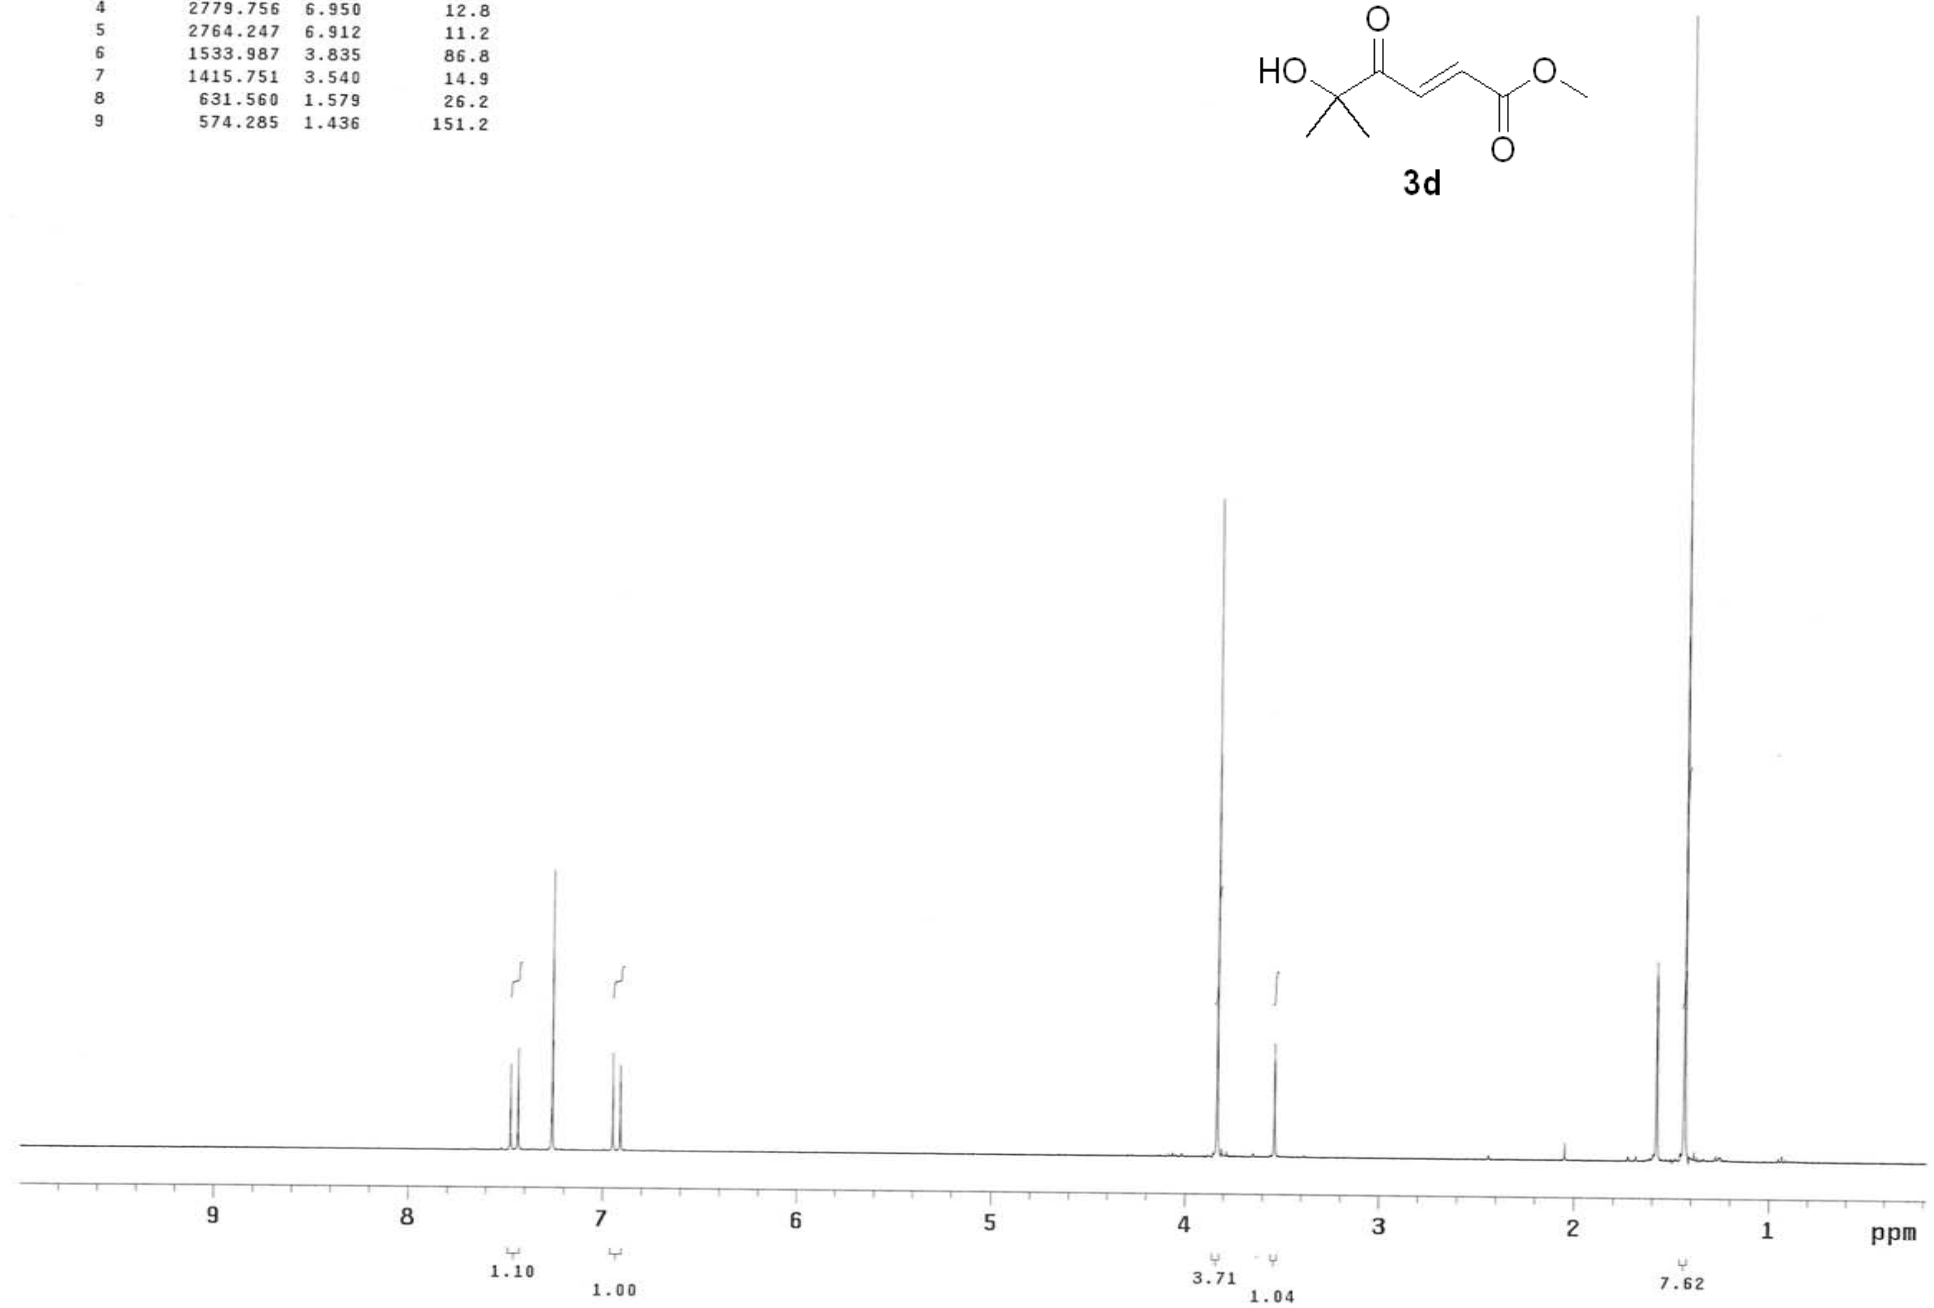

| Peak | FREQUENCY | PPM   | HEIGHT |
|------|-----------|-------|--------|
| 1    | 2907.013  | 7.268 | 25.3   |
| 2    | 2903.020  | 7.258 | 31.8   |
| 3    | 2901.638  | 7.255 | 30.5   |
| 4    | 2896.110  | 7.241 | 46.3   |
| 5    | 2886.437  | 7.217 | 71.9   |
| 6    | 2880.602  | 7.202 | 32.8   |
| 7    | 2879.066  | 7.199 | 41.3   |
| 8    | 2877.991  | 7.196 | 40.5   |
| 9    | 1620.552  | 4.052 | 32.5   |
| 10   | 1613.335  | 4.034 | 49.1   |
| 11   | 1606.272  | 4.016 | 34.0   |
| 12   | 1442.738  | 3.607 | 33.2   |
| 13   | 1430.454  | 3.577 | 29.4   |
| 14   | 586.070   | 1.465 | 151.3  |
| 15   | 524.342   | 1.311 | 145.3  |
| 16   | 432.518   | 1.081 | 60.3   |
| 17   | 425.455   | 1.064 | 127.7  |
| 18   | 418.391   | 1.046 | 62.7   |
| 19   | 301.999   | 0.755 | 59.6   |
| 20   | 294.935   | 0.737 | 123.1  |
| 21   | 287.718   | 0.719 | 63.3   |

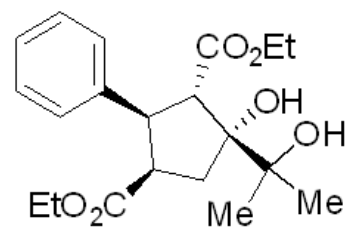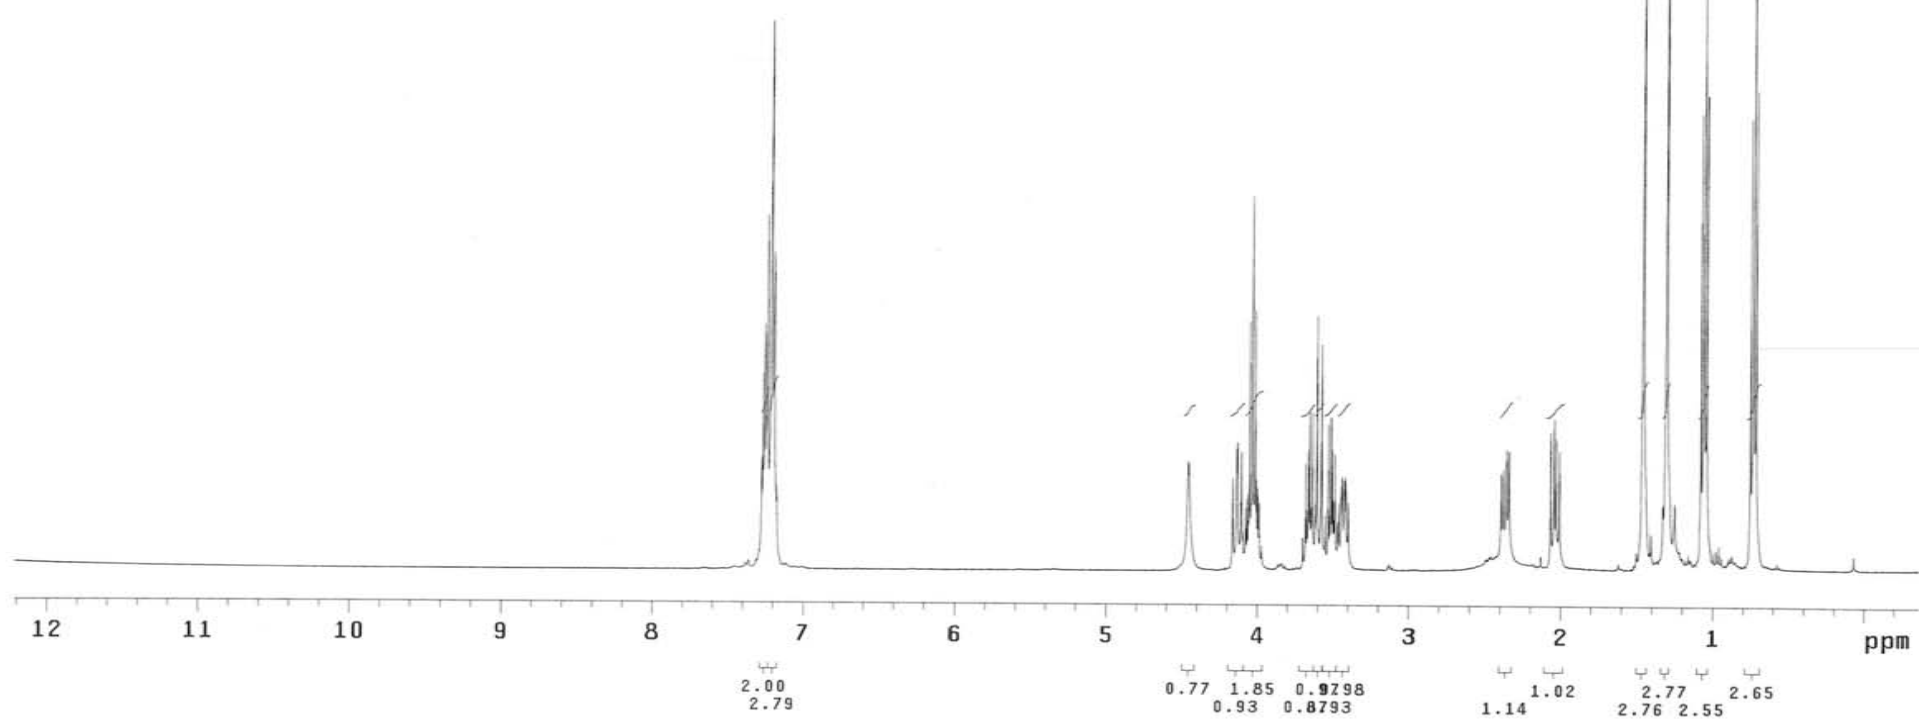

| INDEX | FREQUENCY | PPM     | HEIGHT |
|-------|-----------|---------|--------|
| 1     | 17663.191 | 175.636 | 12.4   |
| 2     | 17571.635 | 174.725 | 12.3   |
| 3     | 13883.474 | 138.052 | 14.1   |
| 4     | 12908.407 | 128.356 | 39.1   |
| 5     | 12901.540 | 128.288 | 44.7   |
| 6     | 12806.170 | 127.339 | 21.2   |
| 7     | 8769.334  | 87.199  | 16.3   |
| 8     | 7798.846  | 77.549  | 80.6   |
| 9     | 7766.801  | 77.230  | 81.0   |
| 10    | 7734.757  | 76.911  | 79.0   |
| 11    | 7525.705  | 74.833  | 15.7   |
| 12    | 6173.735  | 61.389  | 21.1   |
| 13    | 6086.757  | 60.524  | 19.2   |
| 14    | 5144.498  | 51.155  | 19.1   |
| 15    | 5137.632  | 51.087  | 18.3   |
| 16    | 4740.128  | 47.134  | 17.5   |
| 17    | 3856.617  | 38.349  | 11.3   |
| 18    | 2564.921  | 25.505  | 12.7   |
| 19    | 2517.618  | 25.034  | 16.7   |
| 20    | 1407.507  | 13.996  | 20.0   |
| 21    | 1380.803  | 13.730  | 18.4   |

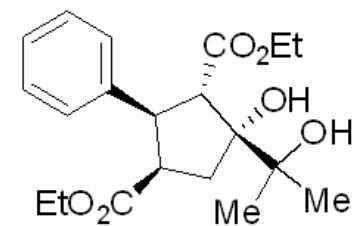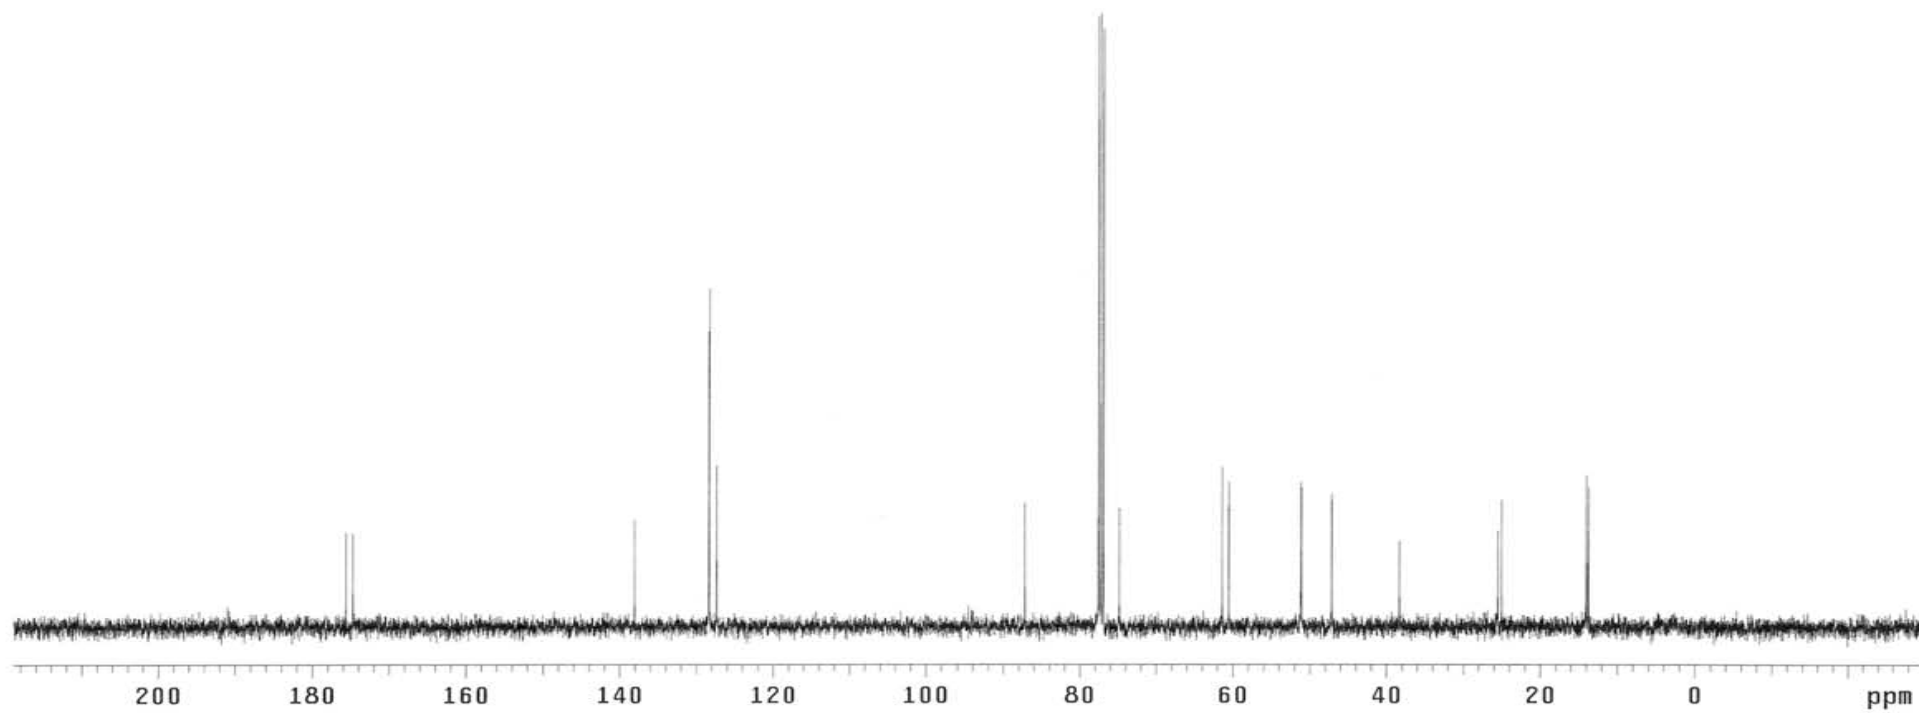

7.372  
7.369  
7.358  
7.343  
7.310  
7.308  
7.300  
7.296  
7.292  
7.284  
7.281  
7.263  
7.248  
7.235  
7.208  
7.194  
7.143  
7.140  
7.126  
7.110  
4.387  
4.383  
4.368  
4.364  
4.257  
4.247  
4.242  
4.239  
4.232  
4.225  
4.218  
4.211  
4.197  
4.190  
4.183  
4.176  
4.103  
4.078  
4.068  
4.062  
4.048  
3.890  
3.882  
3.876  
3.868  
3.854  
3.850  
3.840  
3.836  
3.822  
3.815  
3.808  
3.800  
3.583  
3.579  
3.567  
3.563  
3.552  
3.548  
3.405  
3.384  
3.365  
2.848  
2.845  
2.842  
2.811  
2.808  
2.805  
2.715  
2.698  
2.677  
2.661  
1.293  
1.278  
1.264  
0.917  
0.903  
0.888

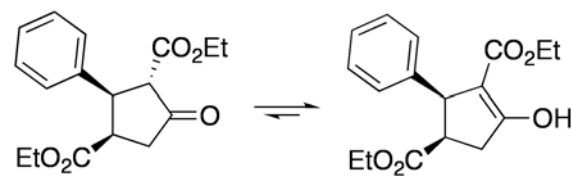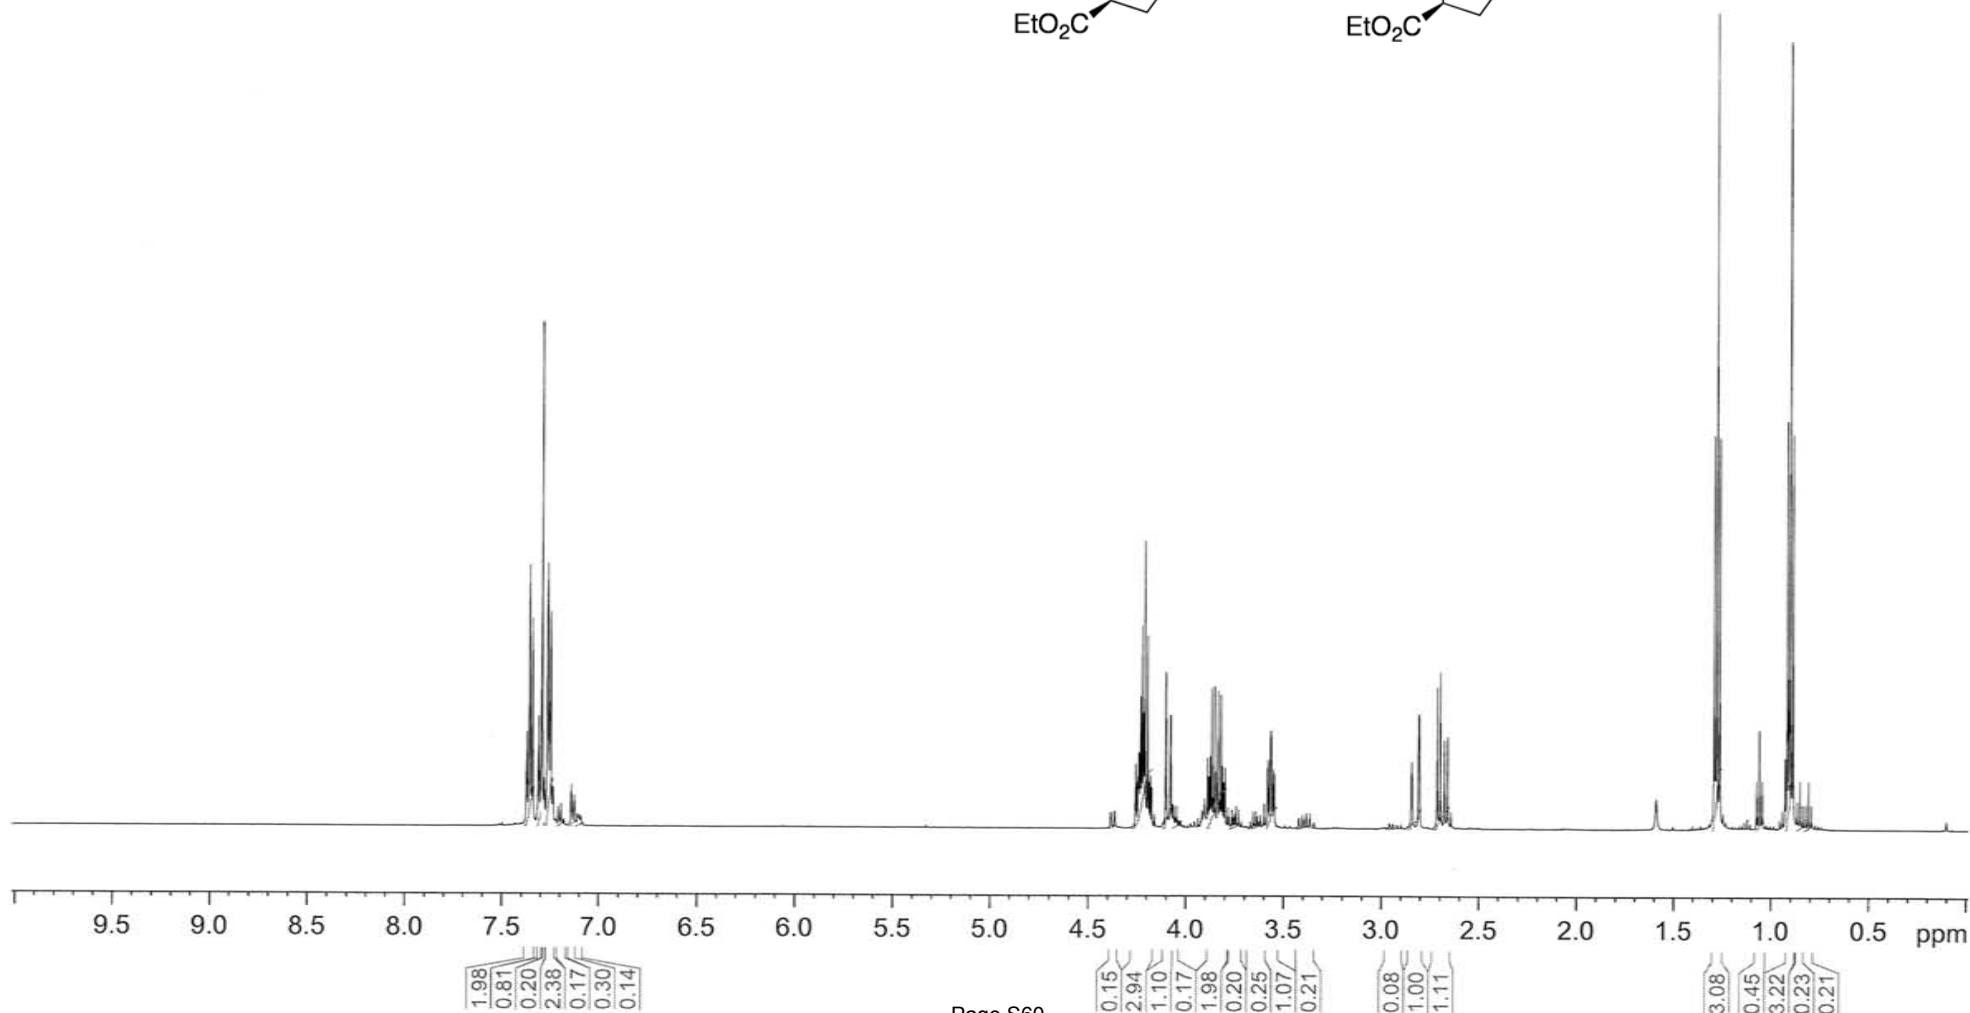

| Peak | FREQUENCY | PPM     | HEIGHT |
|------|-----------|---------|--------|
| 1    | 20976.738 | 208.584 | 8.8    |
| 2    | 17437.354 | 173.390 | 8.3    |
| 3    | 16979.576 | 168.838 | 8.8    |
| 4    | 13783.525 | 137.058 | 10.1   |
| 5    | 12960.289 | 128.872 | 39.9   |
| 6    | 12861.103 | 127.886 | 19.4   |
| 7    | 12806.933 | 127.347 | 35.2   |
| 8    | 7798.846  | 77.549  | 147.4  |
| 9    | 7766.801  | 77.230  | 147.7  |
| 10   | 7735.520  | 76.919  | 141.8  |
| 11   | 6233.246  | 61.981  | 16.6   |
| 12   | 6133.298  | 60.987  | 15.1   |
| 13   | 5703.750  | 56.716  | 17.8   |
| 14   | 4872.121  | 48.446  | 18.9   |
| 15   | 4576.854  | 45.510  | 15.0   |
| 16   | 4234.284  | 42.104  | 12.2   |
| 17   | 1441.077  | 14.330  | 15.0   |
| 18   | 1398.351  | 13.905  | 17.6   |

"Stereodivergency of Triazolium..."

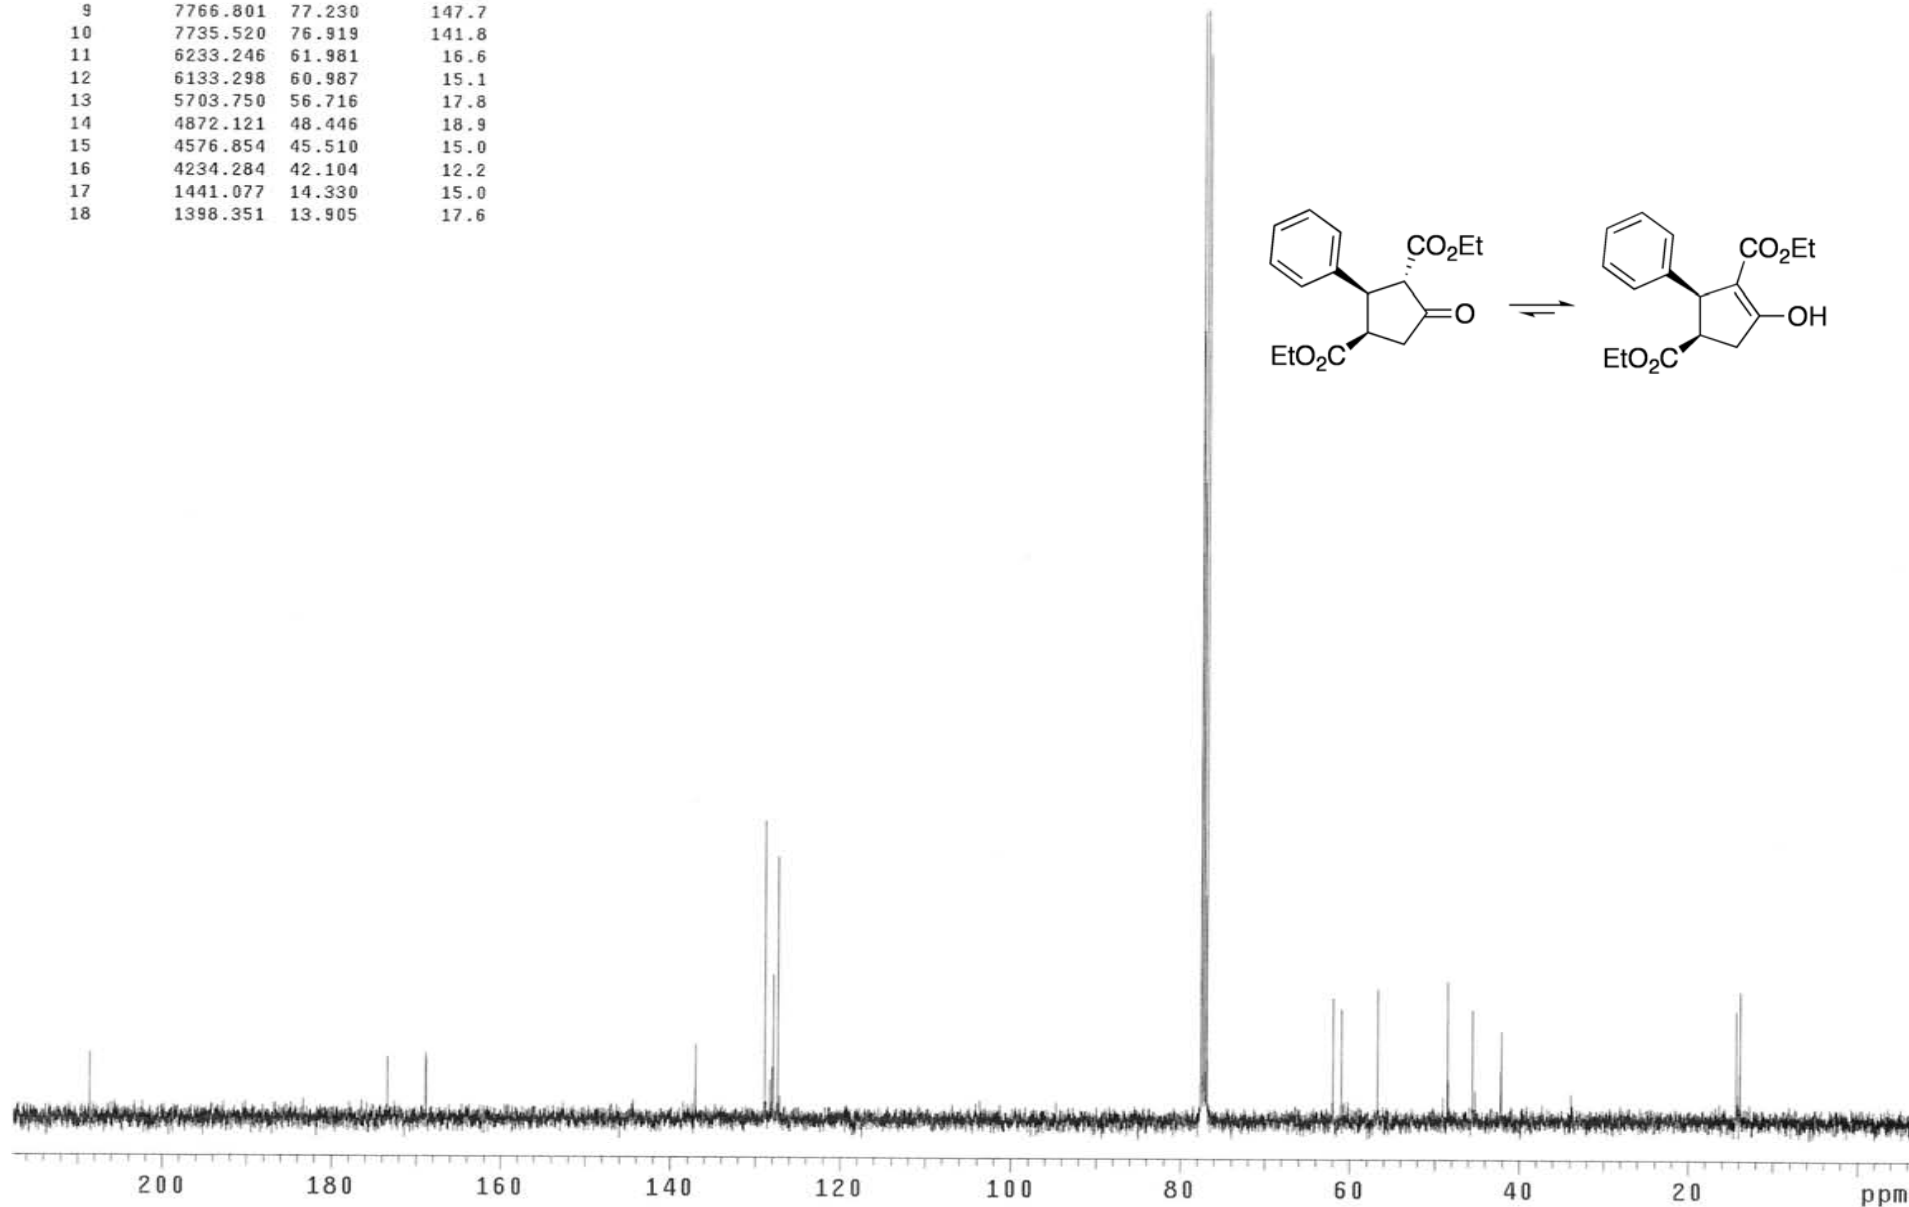

Supplement: NIHMS91355-supplement-1_si_001.pdf [file NIHMS91355-supplement-1_si_001.pdf]
